# Supplementary material for: Fe-mediated oxidative cascade [1 + 2 + 3]-cyclization/esterification reaction: synthesis of 4-alkylated 1,4-dihydropyridines
Source: Royal Society of Chemistry journal article supplement (doi:10.1039/d3ob00704a), 2023-01-01
Supplement: d3ob00704a1.pdf [file d3ob00704a1.pdf]

# Fe-Mediated Oxidative Cascade [1+2+3]-Cyclization/Esterification Reaction: Synthesis of 4-Alkylated 1,4-Dihydropyridines

Zhuoyuan Liu,<sup>a</sup> Yulin Sun,<sup>a</sup> Mingshuai Zhang,<sup>a</sup> Longkun Chen,<sup>a</sup> Xue-Bing Chen<sup>\*b</sup>, Xiang Li<sup>\*c</sup> and Fuchao Yu<sup>\*a</sup>

<sup>a</sup>Faculty of Life Science and Technology, Kunming University of Science and Technology, Kunming, 650504, P. R. China.

<sup>b</sup>College of Science, Honghe University, Mengzi, 661199, Yunnan, P. R. China.

<sup>c</sup>Research Center for Analysis and Measurement, Kunming University of Science and Technology, Kunming 650500, PR China.

## Supporting Information

### Table of Contents

|                                                                                   |    |
|-----------------------------------------------------------------------------------|----|
| 1. General information.....                                                       | 2  |
| 2. General procedure.....                                                         | 3  |
| 3. Spectroscopic data.....                                                        | 4  |
| 4. <sup>1</sup> H NMR and <sup>13</sup> C NMR spectra for spectroscopic data..... | 16 |
| 5. References and notes.....                                                      | 75 |

## 1. General information.

All compounds were fully characterized by spectroscopic data. The NMR spectra were recorded on a DRX600 ( $^1\text{H}$ : 600 MHz,  $^{13}\text{C}$ : 150 MHz), chemical shifts ( $\delta$ ) are expressed in ppm, and  $J$  values are given in Hz, and deuterated  $\text{CDCl}_3$  and  $\text{DMSO-}d_6$  were used as solvent. The reactions were monitored by thin layer chromatography (TLC) using silica gel  $\text{GF}_{254}$ . The melting points were determined on XT-4A melting point apparatus and are uncorrected. HRMs were performed on an Agilent LC/MS TOF instrument.

All chemicals and solvents were used as received without further purification unless otherwise stated. Column chromatography was performed on silica gel (200–300 mesh).

Enaminones **1** were prepared according to the literature<sup>1</sup>. Other reagents were purchased from Energy Chemical and Adamas-beta®.

## 2. General procedure.

### 2.1 Synthesis of 1,4-DHPs 4.

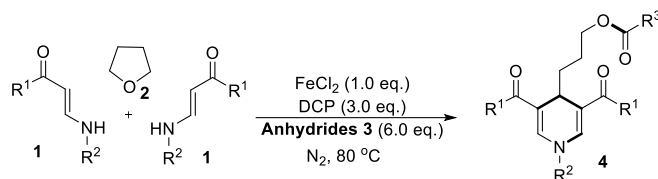

Enaminones **1** (0.4 mmol), FeCl<sub>2</sub> (0.2 mmol), acid anhydrides **3** (1.2 mmol), DCP (0.6 mmol) and tetrahydrofuran (3.0 mL) were charged into a 10 mL Ace Glass pressure tubes under nitrogen atmosphere, and the mixture was stirred at 80 °C for 8.0 h until enaminones were completely consumed. The mixture was cooled to room temperature, and then EtOAc (15 mL × 2) were added. The organic phase was washed with water (10 mL), dried over Na<sub>2</sub>SO<sub>4</sub>, concentrated and purified by flash column chromatography to afford 1,4-DHPs **4**.

### 2.2 Gram-level synthesis of 1,4-DHPs 4a.

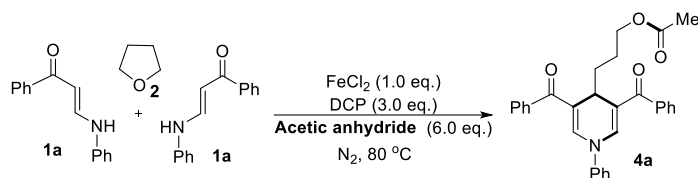

Enaminone **1a** (10 mmol), FeCl<sub>2</sub> (5.0 mmol), acetic anhydride (30 mmol), DCP (15 mmol) and tetrahydrofuran (50 mL) were charged into a 10 mL Ace Glass pressure tubes under nitrogen atmosphere, and the mixture was stirred at 80 °C for 8.0 h until enaminones were completely consumed. The mixture was cooled to room temperature, and then EtOAc (30 mL × 3) were added. The organic phase was washed with water (30 mL), dried over Na<sub>2</sub>SO<sub>4</sub>, concentrated and purified by flash column chromatography to afford 1,4-DHPs **4a** in 49% yield (1.1 g).

### 2.3 Synthesis of 1,4-DHP 5.

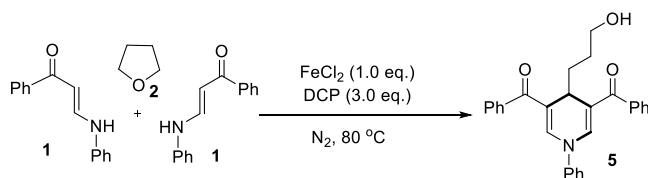

Enaminone **1a** (0.4 mmol), FeCl<sub>2</sub> (0.2 mmol), DCP (0.6 mmol) and tetrahydrofuran (3.0 mL) were charged into a 10 mL Ace Glass pressure tubes under nitrogen atmosphere, and the mixture was stirred at 80 °C for 8.0 h until enaminones were completely consumed. The mixture was cooled to room temperature, and then EtOAc (15 mL × 2) were added. The organic phase was washed with water (10 mL), dried over Na<sub>2</sub>SO<sub>4</sub>, concentrated and purified by flash column chromatography to afford 1,4-DHP **5** in 42% yield.

### 3. Spectroscopic data.

#### 3-(3,5-Dibenzoyl-1-phenyl-1,4-dihydropyridin-4-yl)propyl acetate (4a)

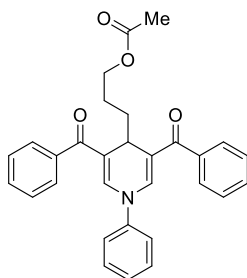

$V_{\text{Petroleum ether}}/V_{\text{Ethyl acetate}} = 5:1$ ,  $R_f = 0.5$ ; Yellow solid: 68 mg (73%); mp = 115–117 °C;  $^1\text{H NMR}$  (600 MHz,  $\text{DMSO-}d_6$ )  $\delta = 7.69$  (d,  $J = 7.6$  Hz, 4H, ArH), 7.59–7.57 (m, 2H, ArH), 7.53–7.50 (m, 4H, ArH), 7.43–7.40 (m, 2H, ArH), 7.33–7.32 (m, 2H, ArH), 7.29–7.28 (m, 3H, ArH+C=CH), 4.46 (t,  $J = 5.2$  Hz, 1H, C-CH), 4.00 (t,  $J = 6.5$  Hz, 2H, C-CH<sub>2</sub>), 1.94 (s, 3H, C-CH<sub>3</sub>), 1.69–1.62 (m, 2H, C-CH<sub>2</sub>), 1.58–1.55 (m, 2H, C-CH<sub>2</sub>);  $^{13}\text{C NMR}$  (150 MHz,  $\text{DMSO-}d_6$ )  $\delta = 194.8$ , 194.8, 170.9, 143.2, 141.7, 141.7, 139.2, 139.2, 131.8, 131.8, 130.5, 130.5, 129.0, 129.0, 129.0, 129.0, 128.9, 128.9, 128.9, 128.9, 127.2, 121.6, 121.6, 118.7, 118.7, 64.5, 31.9, 29.9, 24.5, 21.2; HRMS (TOF ES<sup>+</sup>):  $m/z$  calcd for  $\text{C}_{30}\text{H}_{27}\text{NO}_4$  [(M+H)<sup>+</sup>], 466.2013, found, 466.2017.

#### 3-(3,5-Bis(4-methoxybenzoyl)-1-phenyl-1,4-dihydropyridin-4-yl)propyl acetate (4b)

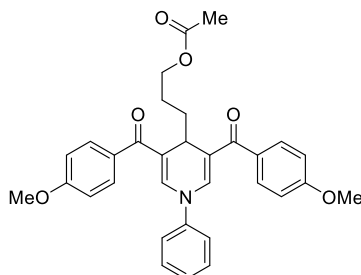

$V_{\text{Petroleum ether}}/V_{\text{Ethyl acetate}} = 5:1$ ,  $R_f = 0.5$ ; Yellow solid: 76 mg (72%); mp = 137–139 °C;  $^1\text{H NMR}$  (600 MHz,  $\text{DMSO-}d_6$ )  $\delta = 7.70$  (d,  $J = 8.3$  Hz, 4H, ArH), 7.43–7.40 (m, 2H, ArH), 7.36–7.35 (m, 2H, ArH), 7.27–7.26 (m, 3H, ArH+C=CH), 7.04 (d,  $J = 8.2$  Hz, 5H, ArH), 4.42 (t,  $J = 5.4$  Hz, 1H, C-CH), 3.96 (t,  $J = 6.5$  Hz, 2H, C-CH<sub>2</sub>), 3.82 (s, 6H, ArOCH<sub>3</sub>), 1.91 (s, 3H, C-CH<sub>3</sub>), 1.63–1.60 (m, 2H, C-CH<sub>2</sub>), 1.54–1.50 (m, 2H, CH<sub>2</sub>);  $^{13}\text{C NMR}$  (150 MHz,  $\text{DMSO-}d_6$ )  $\delta = 193.8$ , 193.8, 170.9, 162.4, 162.4, 143.3, 140.4, 140.4, 131.5, 131.5, 131.2, 131.2, 131.2, 131.2, 130.4, 130.4, 126.9, 121.4, 121.4, 118.6, 118.6, 114.3, 114.3, 114.3, 114.3, 64.44, 55.85, 55.85, 32.10, 30.64, 24.61, 21.16; HRMS (TOF ES<sup>+</sup>):  $m/z$  calcd for  $\text{C}_{32}\text{H}_{31}\text{NO}_6$  [(M+H)<sup>+</sup>], 526.2224, found, 526.2238.

#### 3-(3,5-Bis(4-methylbenzoyl)-1-phenyl-1,4-dihydropyridin-4-yl)propyl acetate (4c)

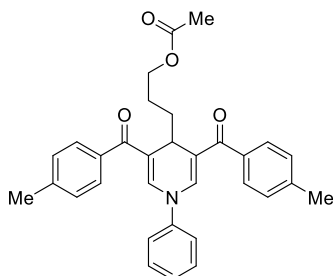

$V_{\text{Petroleum ether}}/V_{\text{Ethyl acetate}} = 4:1$ ,  $R_f=0.5$ ; Yellow solid: 66 mg (68%); mp = 157–159 °C;  $^1\text{H NMR}$  (600 MHz,  $\text{DMSO-}d_6$ )  $\delta = 7.60\text{--}7.58$  (m, 4H, ArH), 7.41–7.39 (m, 2H, ArH), 7.32–7.30 (m, 6H, ArH+C=CH), 7.26–7.24 (m, 2H, ArH), 4.43–4.41 (m, 1H, C-CH), 3.98–3.96 (m, 2H, C-CH<sub>2</sub>), 2.36 (s, 6H, ArCH<sub>3</sub>), 1.91 (s, 3H, C-CH<sub>3</sub>), 1.63–1.61 (m, 2H, C-CH<sub>2</sub>), 1.54–1.52 (m, 2H, C-CH<sub>2</sub>);  $^{13}\text{C NMR}$  (150 MHz,  $\text{DMSO-}d_6$ )  $\delta = 194.6, 194.6, 170.9, 143.3, 141.9, 141.9, 141.2, 141.2, 136.5, 136.5, 130.5, 130.5, 129.5, 129.5, 129.5, 129.5, 129.1, 129.1, 129.1, 129.1, 127.0, 121.5, 121.5, 118.7, 118.7, 64.4, 31.9, 30.1, 24.5, 21.5, 21.5, 21.2$ ; HRMS (TOF ES<sup>+</sup>): m/z calcd for  $\text{C}_{32}\text{H}_{31}\text{NO}_4$  [(M+H)<sup>+</sup>], 493.2373, found, 493.2382.

### 3-(3,5-Bis(4-ethylbenzoyl)-1-phenyl-1,4-dihydropyridin-4-yl)propyl acetate (4d)

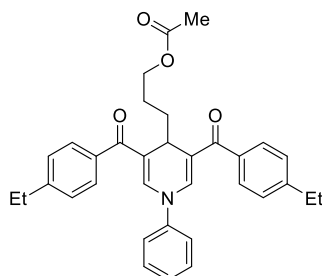

$V_{\text{Petroleum ether}}/V_{\text{Ethyl acetate}} = 5:1$ ,  $R_f = 0.5$ ; Yellow solid: 63 mg (60%); mp = 134–136 °C;  $^1\text{H NMR}$  (600 MHz,  $\text{DMSO-}d_6$ )  $\delta = 7.63$  (d,  $J = 7.8$  Hz, 4H, ArH), 7.43–7.41 (m, 2H, ArH), 7.35 (d,  $J = 7.8$  Hz, 6H, ArH), 7.29–7.27 (m, 3H, C=CH+ArH), 4.44 (t,  $J = 5.9$  Hz, 1H, C-CH), 3.98 (t,  $J = 6.4$  Hz, 2H, C-CH<sub>2</sub>), 2.69–2.65 (m, 4H, C-CH<sub>2</sub>), 1.93 (s, 3H, C-CH<sub>3</sub>), 1.67–1.60 (m, 2H, C-CH<sub>2</sub>), 1.57–1.52 (m, 2H, C-CH<sub>2</sub>), 1.20 (t,  $J = 7.6$  Hz, 6H, C-CH<sub>3</sub>);  $^{13}\text{C NMR}$  (150 MHz,  $\text{DMSO-}d_6$ )  $\delta = 194.6, 194.6, 170.9, 148.0, 148.0, 143.3, 141.2, 141.2, 136.7, 136.7, 130.5, 130.5, 130.5, 130.5, 129.2, 129.2, 129.2, 129.2, 128.4, 128.4, 128.4, 128.4, 127.1, 121.7, 121.7, 118.6, 118.6, 64.5, 32.0, 30.2, 28.5, 24.6, 21.2, 15.7$ ; HRMS (TOF ES<sup>+</sup>): m/z calcd for  $\text{C}_{34}\text{H}_{35}\text{NO}_4$  [(M+H)<sup>+</sup>], 520.2614, found, 520.2625.

### 3-(3,5-Bis(4-fluorobenzoyl)-1-phenyl-1,4-dihydropyridin-4-yl)propyl acetate (4e)

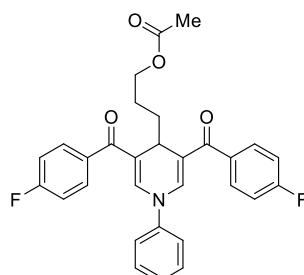

$V_{\text{Petroleum ether}}/V_{\text{Ethyl acetate}} = 5:1$ ,  $R_f = 0.5$ ; Yellow solid: 65 mg (65%); mp = 127–129 °C;  $^1\text{H NMR}$  (600 MHz,  $\text{DMSO-}d_6$ )  $\delta = 7.78\text{--}7.76$  (m, 4H, ArH), 7.41–7.28 (m, 11H, ArH+C=CH), 4.43–4.41 (m, 1H, C-CH), 3.98–3.96 (m, 2H, C-CH<sub>2</sub>), 1.92 (s, 3H, C-CH<sub>3</sub>), 1.63–1.61 (m, 2H, CH<sub>2</sub>), 1.55–1.53 (m, 2H, C-CH<sub>2</sub>);  $^{13}\text{C NMR}$  (150 MHz,  $\text{DMSO-}d_6$ )  $\delta = 193.6, 193.6, 170.9, 164.3$  ( $J_{\text{C-F}} = 249.5$  Hz), 164.3 ( $J_{\text{C-F}} = 249.5$  Hz), 143.2, 141.7, 141.7, 135.7, 131.7 ( $J_{\text{C-F}} = 9.0$  Hz), 130.40, 130.40, 130.40, 130.40, 127.1, 121.6, 121.6, 118.5, 118.5, 116.0 ( $J_{\text{C-F}} = 21.6$  Hz), 64.4, 31.9, 30.0, 24.5, 21.2; HRMS (TOF ES<sup>+</sup>): m/z calcd for  $\text{C}_{30}\text{H}_{25}\text{Cl}_2\text{NO}_4$  [(M+H)<sup>+</sup>], 502.1824, found, 502.1831.

### 3-(3,5-Bis(4-chlorobenzoyl)-1-phenyl-1,4-dihydropyridin-4-yl)propyl acetate (4f)

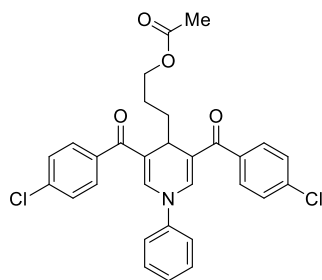

$V_{\text{Petroleum ether}}/V_{\text{Ethyl acetate}} = 5:1$ ,  $R_f = 0.5$ ; Yellow solid: 59 mg (56%); mp = 153–155 °C;  $^1\text{H NMR}$  (600 MHz,  $\text{DMSO-}d_6$ )  $\delta = 7.73$  (d,  $J = 7.9$  Hz, 4H, ArH), 7.58–7.57 (m, 4H, ArH), 7.43–7.39 (m, 2H, ArH), 7.33 (s, 2H, C=CH), 7.31–7.30 (m, 1H, ArH), 4.43–4.42 (m, 1H, C-CH), 4.00–3.98 (m, 2H, C-CH<sub>2</sub>), 1.94 (s, 3H, C-CH<sub>3</sub>), 1.69–1.61 (m, 2H, C-CH<sub>2</sub>), 1.61–1.50 (m, 2H, C-CH<sub>2</sub>);  $^{13}\text{C NMR}$  (150 MHz,  $\text{DMSO-}d_6$ )  $\delta = 193.6, 193.6, 170.9, 143.1, 142.0, 142.0, 137.9, 137.9, 136.6, 130.6, 130.9, 130.9, 130.9, 130.9, 130.4, 130.4, 129.1, 129.1, 129.1, 129.1, 127.2, 121.7, 121.7, 118.5, 118.5, 64.4, 31.8, 29.9, 24.5, 21.2$ ; HRMS (TOF ES<sup>+</sup>):  $m/z$  calcd for  $\text{C}_{30}\text{H}_{25}\text{Cl}_2\text{NO}_4$  [(M+H)<sup>+</sup>], 534.1233, found, 534.1238.

### 3-(3,5-Bis(4-bromobenzoyl)-1-phenyl-1,4-dihydropyridin-4-yl)propyl acetate (4g)

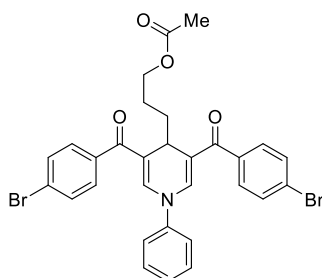

$V_{\text{Petroleum ether}}/V_{\text{Ethyl acetate}} = 5:1$ ,  $R_f = 0.5$ ; Yellow solid: 66 mg (54%); mp = 168–170 °C;  $^1\text{H NMR}$  (600 MHz,  $\text{DMSO-}d_6$ )  $\delta = 7.71$  (d,  $J = 8.1$  Hz, 4H, ArH), 7.64 (d,  $J = 8.1$  Hz, 4H, ArH), 7.44–7.41 (m, 2H, ArH), 7.39–7.37 (m, 2H, ArH), 7.32–7.28 (m, 3H, ArH+C=CH), 4.41 (t,  $J = 5.0$  Hz, 1H, C-CH), 3.98 (t,  $J = 6.4$  Hz, 2H, C-CH<sub>2</sub>), 1.94 (s, 3H, C-CH<sub>3</sub>), 1.67–1.59 (m, 2H, C-CH<sub>2</sub>), 1.56–1.53 (m, 2H, C-CH<sub>2</sub>);  $^{13}\text{C NMR}$  (150 MHz,  $\text{DMSO-}d_6$ )  $\delta = 193.8, 193.8, 170.9, 143.1, 142.0, 142.0, 138.3, 138.3, 132.0, 132.0, 132.0, 132.0, 131.0, 131.0, 131.0, 131.0, 130.4, 130.4, 127.2, 125.5, 125.5, 121.7, 121.7, 118.5, 118.5, 64.4, 31.8, 29.8, 24.5, 21.2$ ; HRMS (TOF ES<sup>+</sup>):  $m/z$  calcd for  $\text{C}_{30}\text{H}_{26}\text{Br}_2\text{NO}_4$  [(M+H)<sup>+</sup>], 622.0023, found, 622.0030.

### 3-(3,5-Di(2-naphthoyl)-1-phenyl-1,4-dihydropyridin-4-yl)propyl acetate (4h)

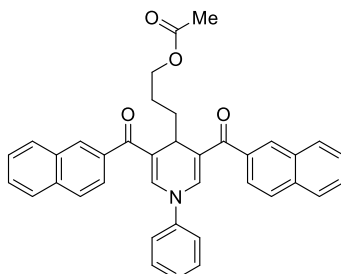

$V_{\text{Petroleum ether}}/V_{\text{Ethyl acetate}} = 3:1$ ,  $R_f = 0.5$ ; Yellow solid: 66 mg (58%); mp = 175–177 °C;  $^1\text{H NMR}$  (600 MHz,  $\text{DMSO-}d_6$ )  $\delta = 8.34$  (s, 2H, ArH), 8.14–8.13 (m, 2H, ArH), 8.05–7.99 (m, 4H, ArH), 7.78 (d,  $J = 8.5$  Hz, 2H, ArH), 7.65–7.55 (m, 4H, ArH), 7.43 (s, 2H, ArH), 7.36–7.34 (m, 4H, ArH+C=CH), 7.22–7.20 (m, 1H, ArH), 4.57–4.55 (m, 1H, C-CH), 4.05 (t,  $J = 6.6$  Hz, 2H, C-CH<sub>2</sub>), 1.92 (s, 3H, C-CH<sub>3</sub>),

1.79–1.72 (m, 2H, C-CH<sub>2</sub>), 1.68–1.64 (m, 2H, C-CH<sub>2</sub>); <sup>13</sup>C NMR (150 MHz, DMSO-*d*<sub>6</sub>)  $\delta$  = 194.8, 194.8, 171.0, 143.2, 141.9, 136.6, 136.6, 134.6, 134.6, 132.6, 132.6, 130.4, 130.4, 130.4, 129.6, 129.6, 129.3, 129.3, 128.7, 128.7, 128.3, 128.3, 128.1, 128.1, 127.4, 127.4, 127.0, 125.8, 125.8, 121.5, 121.5, 121.5, 119.0, 119.0, 64.6, 32.2, 30.1, 24.7, 21.2; HRMS (TOF ES<sup>+</sup>): *m/z* calcd for C<sub>38</sub>H<sub>31</sub>NO<sub>4</sub> [(M+H)<sup>+</sup>], 566.2326, found, 566.2333.

**3-(3,5-Bis(benzo[*d*][1,3]dioxole-5-carbonyl)-1-phenyl-1,4-dihydropyridin-4-yl)propyl acetate (4i)**

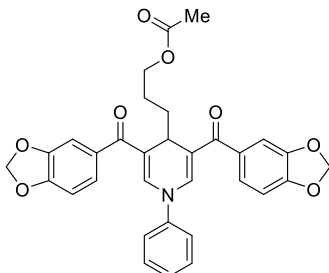

$V_{\text{Petroleum ether}}/V_{\text{Ethyl acetate}} = 5:1$ ,  $R_f = 0.5$ ; Yellow solid: 34 mg (31%); mp = 137–139 °C; <sup>1</sup>H NMR (600 MHz, DMSO-*d*<sub>6</sub>)  $\delta$  = 7.43 (t,  $J = 7.8$  Hz, 2H, ArH), 7.38 (d,  $J = 8.0$  Hz, 2H, ArH), 7.30–7.28 (m, 4H, ArH), 7.23 (s, 2H, C=CH), 7.02 (d,  $J = 8.0$  Hz, 2H, ArH), 6.12 (d,  $J = 4.5$  Hz, 4H, C-CH<sub>2</sub>), 4.39–4.38 (m, 1H, C-CH), 3.96 (t,  $J = 6.5$  Hz, 2H, C-CH<sub>2</sub>), 1.92 (s, 3H, C-CH<sub>3</sub>), 1.64–1.55 (m, 2H, C-CH<sub>2</sub>), 1.52–1.49 (m, 2H, C-CH<sub>2</sub>); <sup>13</sup>C NMR (150 MHz, DMSO-*d*<sub>6</sub>)  $\delta$  = 194.8, 194.8, 170.9, 143.2, 141.7, 141.7, 139.2, 139.2, 131.8, 131.8, 130.5, 130.5, 129.0, 129.0, 129.0, 129.0, 128.9, 128.9, 128.9, 128.9, 127.2, 121.6, 121.6, 118.7, 118.7, 64.5, 31.9, 29.9, 24.5, 21.2; HRMS (TOF ES<sup>+</sup>): *m/z* calcd for C<sub>32</sub>H<sub>27</sub>NO<sub>8</sub> [(M+H)<sup>+</sup>], 554.1809, found, 554.1814.

**3-(3,5-Di(furan-2-carbonyl)-1-phenyl-1,4-dihydropyridin-4-yl)propyl acetate (4j)**

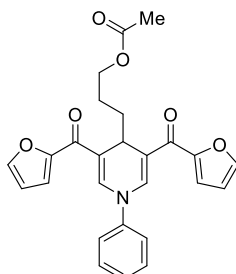

$V_{\text{Petroleum ether}}/V_{\text{Ethyl acetate}} = 4:1$ ,  $R_f = 0.5$ ; Yellow solid: 53 mg (59%); mp = 130–132 °C; <sup>1</sup>H NMR (600 MHz, DMSO-*d*<sub>6</sub>)  $\delta$  = 7.99 (d,  $J = 8.9$  Hz, 4H, C=CH), 7.59–7.57 (m, 2H, C=CH), 7.54–7.51 (m, 2H, ArH), 7.38–7.35 (m, 3H, ArH+C=CH), 6.76–6.67 (m, 2H, C=CH), 4.36–7.34 (m, 1H, C-CH), 3.93–3.91 (m, 2H, C-CH<sub>2</sub>), 1.90 (s, 3H, C-CH<sub>3</sub>), 1.56–1.50 (m, 2H, C-CH<sub>2</sub>), 1.49–1.44 (m, 2H, C-CH<sub>2</sub>); <sup>13</sup>C NMR (150 MHz, DMSO-*d*<sub>6</sub>)  $\delta$  = 179.9, 179.9, 170.8, 152.3, 152.3, 147.4, 147.4, 143.4, 139.9, 139.9, 130.5, 130.5, 127.1, 121.6, 121.6, 118.5, 118.5, 117.8, 117.8, 112.6, 112.6, 64.4, 32.0, 29.9, 24.4, 21.1; HRMS (TOF ES<sup>+</sup>): *m/z* calcd for C<sub>26</sub>H<sub>23</sub>NO<sub>6</sub> [(M+H)<sup>+</sup>], 446.1598, found, 446.1604.

**3-(3,5-Bis(4-(methylsulfonyl)benzoyl)-1-phenyl-1,4-dihydropyridin-4-yl)propyl acetate (4k)**

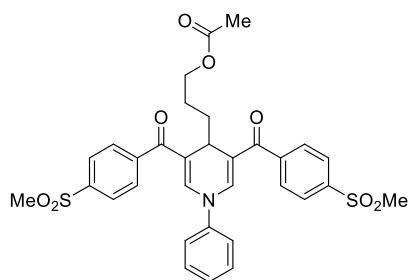

$V_{\text{Petroleum ether}}/V_{\text{Ethyl acetate}} = 3:1$ ,  $R_f = 0.5$ ; Yellow solid: 54 mg (44%); mp = 171–173 °C;  $^1\text{H NMR}$  (600 MHz,  $\text{DMSO-}d_6$ )  $\delta = 8.04$  (d,  $J = 8.0$  Hz, 4H, ArH), 7.93 (d,  $J = 8.0$  Hz, 4H, ArH), 7.46–7.38 (m, 4H, ArH), 7.35 (s, 2H, C=CH), 7.32–7.28 (m, 1H, ArH), 4.44 (t,  $J = 5.2$  Hz, 1H, C–CH), 4.01 (t,  $J = 6.5$  Hz, 2H, C–CH<sub>2</sub>), 3.29 (s, 6H, C–CH<sub>3</sub>), 1.96 (s, 3H, C–CH<sub>3</sub>), 1.67–1.64 (m, 2H, C–CH<sub>2</sub>), 1.61–1.58 (m, 2H, C–CH<sub>2</sub>);  $^{13}\text{C NMR}$  (150 MHz,  $\text{DMSO-}d_6$ )  $\delta = 193.6$ , 193.6, 170.9, 143.6, 143.6, 143.1, 143.1, 143.0, 143.0, 130.4, 130.4, 130.4, 130.4, 129.7, 129.7, 129.7, 129.7, 127.7, 127.7, 127.7, 127.7, 122.1, 122.1, 118.5, 118.5, 64.5, 43.7, 43.7, 31.9, 29.4, 24.5, 21.2; HRMS (TOF ES<sup>+</sup>):  $m/z$  calcd for  $\text{C}_{32}\text{H}_{31}\text{NO}_8\text{S}_2$  [(M+H)<sup>+</sup>], 622.1564, found, 622.1558.

### 3-(3,5-Dibenzoyl-1-(3,4,5-trimethoxyphenyl)-1,4-dihydropyridin-4-yl)propyl acetate (4l)

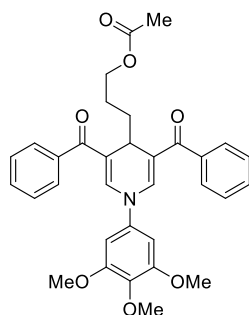

$V_{\text{Petroleum ether}}/V_{\text{Ethyl acetate}} = 4:1$ ,  $R_f = 0.5$ ; Yellow solid: 50 mg (48%); mp = 135–137 °C;  $^1\text{H NMR}$  (600 MHz,  $\text{DMSO-}d_6$ )  $\delta = 7.71$ –7.69 (m, 4H, ArH), 7.56–7.49 (m, 6H, ArH), 7.22 (s, 2H, C=CH), 6.68–7.66 (m, 2H, ArH), 4.43–4.45 (m, 1H, C–CH), 3.40–3.38 (s, 2H, C–CH<sub>2</sub>), 3.72 (s, 6H, ArOCH<sub>3</sub>), 3.58 (s, 3H, ArOCH<sub>3</sub>), 1.92 (s, 3H, C–CH<sub>3</sub>), 1.66–1.64 (m, 2H, C–CH<sub>2</sub>), 1.57–1.55 (m, 2H, C–CH<sub>2</sub>);  $^{13}\text{C NMR}$  (150 MHz,  $\text{DMSO-}d_6$ )  $\delta = 194.8$ , 194.8, 170.9, 153.9, 153.9, 153.9, 142.4, 142.4, 139.6, 139.2, 136.7, 131.9, 131.9, 129.0, 129.0, 129.0, 129.0, 128.9, 128.9, 128.9, 128.9, 118.1, 118.1, 100.5, 100.5, 64.5, 60.5, 56.7, 56.7, 32.0, 30.0, 24.6, 21.2; HRMS (TOF ES<sup>+</sup>):  $m/z$  calcd for  $\text{C}_{31}\text{H}_{30}\text{NO}_5$  [(M+H)<sup>+</sup>], 556.2330, found, 556.2333

### 3-(3,5-Dibenzoyl-1-(4-(dimethylamino)phenyl)-1,4-dihydropyridin-4-yl)propyl acetate (4m)

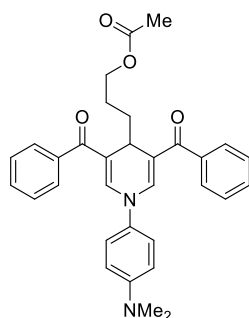

$V_{\text{Petroleum ether}}/V_{\text{Ethyl acetate}} = 5:1$ ,  $R_f = 0.5$ ; Yellow liquid: 47 mg (46%);  $^1\text{H NMR}$  (600 MHz,  $\text{DMSO-}d_6$ )  $\delta =$



7.65–7.61 (m, 4H, ArH), 7.54 (d,  $J = 7.6$  Hz, 2H, ArH), 7.50–7.47 (m, 4H, ArH), 7.12–7.09 (m, 4H, ArH+C=CH), 6.67 (d,  $J = 8.5$  Hz, 2H, ArH), 4.44–4.43 (m, 1H, C–CH), 4.00 (t,  $J = 6.5$  Hz, 2H, CH<sub>2</sub>), 2.84 (s, 6H, N-CH<sub>3</sub>), 1.94 (s, 3H, C-CH<sub>3</sub>), 1.66–1.64 (m, 2H, C-CH<sub>2</sub>), 1.57–1.53 (m, 2H, C-CH<sub>2</sub>); <sup>13</sup>C NMR (150 MHz, DMSO-*d*<sub>6</sub>)  $\delta = 194.7, 194.7, 170.9, 149.8, 142.9, 142.9, 139.4, 139.4, 132.7, 131.6, 131.6, 128.5, 128.5, 128.5, 128.5, 128.9, 128.9, 128.9, 128.9, 123.2, 123.2, 117.8, 117.8, 113.3, 113.3, 64.5, 40.6, 40.6, 31.9, 29.6, 24.5, 21.2$ ; HRMS (TOF ES<sup>+</sup>):  $m/z$  calcd for C<sub>31</sub>H<sub>30</sub>NO<sub>5</sub> [(M+H)<sup>+</sup>], 509.2435, found, 509.2441.

### 3-(3,5-Dibenzoyl-1-(4-methoxyphenyl)-1,4-dihydropyridin-4-yl)propyl acetate (4n)

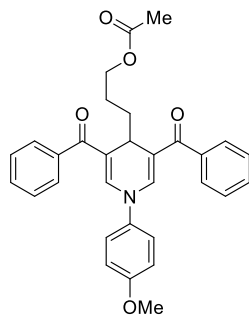

$V_{\text{Petroleum ether}}/V_{\text{Ethyl acetate}} = 4:1$ ,  $R_f = 0.5$ ; Yellow solid: 50 mg (47%); mp = 113–115 °C; <sup>1</sup>H NMR (600 MHz, DMSO-*d*<sub>6</sub>)  $\delta = 7.66$  (d,  $J = 7.6$  Hz, 4H, ArH), 7.58–7.55 (m, 2H, ArH), 7.51–7.49 (m, 4H, ArH), 7.28 (d,  $J = 8.7$  Hz, 2H, ArH), 7.15 (s, 2H, C=CH), 6.95 (d,  $J = 8.6$  Hz, 2H, ArH), 4.44 (t,  $J = 5.2$  Hz, 1H, C–CH), 4.00 (t,  $J = 6.6$  Hz, 2H, C-CH<sub>2</sub>), 3.72 (s, 3H, ArOCH<sub>3</sub>), 1.94 (s, 3H, CH<sub>3</sub>), 1.68–1.63 (m, 2H, C-CH<sub>2</sub>), 1.59–1.53 (m, 2H, C-CH<sub>2</sub>); <sup>13</sup>C NMR (150 MHz, DMSO-*d*<sub>6</sub>)  $\delta = 194.7, 194.7, 190.7, 170.9, 158.4, 142.5, 142.5, 139.3, 139.3, 136.6, 131.7, 131.7, 129.0, 129.0, 129.0, 129.0, 128.8, 128.8, 128.8, 128.8, 123.7, 123.7, 118.1, 118.1, 115.5, 115.5, 64.5, 55.9, 31.9, 29.7, 24.5, 21.2$ ; HRMS (TOF ES<sup>+</sup>):  $m/z$  calcd for C<sub>31</sub>H<sub>29</sub>NO<sub>5</sub> [(M+H)<sup>+</sup>], 496.2118, found, 496.2122.

### 3-(3,5-Dibenzoyl-1-(*p*-tolyl)-1,4-dihydropyridin-4-yl)propyl acetate (4o)

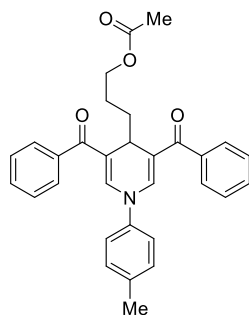

$V_{\text{Petroleum ether}}/V_{\text{Ethyl acetate}} = 5:1$ ,  $R_f = 0.5$ ; Yellow solid: 63 mg (66%); mp = 127–129 °C; <sup>1</sup>H NMR (600 MHz, DMSO-*d*<sub>6</sub>)  $\delta = 7.66$ –7.65 (m, 4H, ArH), 7.57–7.55 (m, 2H, ArH), 7.51–7.49 (m, 4H, ArH), 7.20–7.18 (m, 6H, ArH+C=CH), 4.44–4.42 (m, 1H, C–CH), 4.00–4.38 (m, 2H, C-CH<sub>2</sub>), 2.24 (s, 3H, ArCH<sub>3</sub>), 1.92 (s, 3H, C-CH<sub>3</sub>), 1.65–1.63 (m, 2H, CH<sub>2</sub>), 1.56–1.54 (m, 2H, CH<sub>2</sub>); <sup>13</sup>C NMR (150 MHz, DMSO-*d*<sub>6</sub>)  $\delta = 194.8, 194.8, 170.9, 142.0, 142.0, 140.9, 139.2, 139.2, 136.8, 131.8, 131.8, 130.8, 130.8, 130.0, 130.0, 130.0, 130.0, 128.8, 128.8, 128.8, 128.8, 121.7, 121.7, 118.4, 118.4, 64.5, 31.9, 29.8, 24.5, 21.2, 20.8$ ; HRMS (TOF ES<sup>+</sup>):  $m/z$  calcd for C<sub>31</sub>H<sub>29</sub>NO<sub>4</sub> [(M+H)<sup>+</sup>], 480.2169, found, 480.2186.

### 3-(3,5-Dibenzoyl-1-(4-chlorophenyl)-1,4-dihydropyridin-4-yl)propyl acetate (4p)

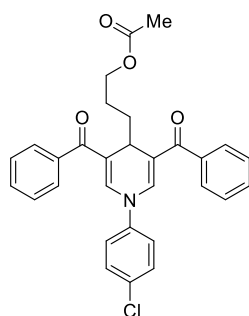

$V_{\text{Petroleum ether}}/V_{\text{Ethyl acetate}} = 5:1$ ,  $R_f = 0.5$ ; Yellow solid: 64 mg (64%); mp = 135–137 °C;  $^1\text{H NMR}$  (600 MHz,  $\text{DMSO-}d_6$ )  $\delta = 7.69$  (d,  $J = 7.5$  Hz, 4H, ArH), 7.59–7.56 (m, 2H, ArH), 7.51–7.49 (m, 4H, ArH), 7.44–7.44 (m, 2H, ArH), 7.37–7.36 (m, 2H, ArH), 7.25 (s, 2H, C=CH), 4.55–4.30 (m, 1H, C–CH), 3.99–3.97 (m, 2H, C–CH<sub>2</sub>), 1.92 (s, 3H, C–CH<sub>3</sub>), 1.68–1.60 (m, 2H, C–CH<sub>2</sub>), 1.57–1.53 (m, 2H, C–CH<sub>2</sub>);  $^{13}\text{C NMR}$  (150 MHz,  $\text{DMSO-}d_6$ )  $\delta = 194.8, 194.8, 170.9, 142.1, 141.4, 141.4, 139.1, 139.1, 131.9, 131.9, 131.3, 130.2, 130.2, 129.0, 129.0, 129.0, 129.0, 128.9, 128.9, 128.9, 128.9, 123.5, 123.5, 118.8, 118.8, 64.4, 31.9, 29.9, 24.5, 21.2$ ; HRMS (TOF ES<sup>+</sup>):  $m/z$  calcd for  $\text{C}_{30}\text{H}_{26}\text{ClNO}_4$  [(M+H)<sup>+</sup>], 500.1623, found, 500.1630.

### 3-(3,5-Dibenzoyl-1-(4-bromophenyl)-1,4-dihydropyridin-4-yl)propyl acetate (4q)

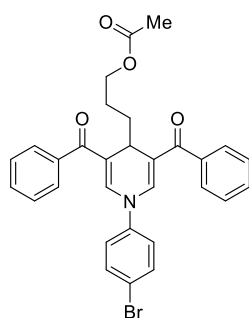

$V_{\text{Petroleum ether}}/V_{\text{Ethyl acetate}} = 5:1$ ,  $R_f = 0.5$ ; Yellow solid: 50 mg (46%); mp = 133–135 °C;  $^1\text{H NMR}$  (600 MHz,  $\text{DMSO-}d_6$ )  $\delta = 7.69$  (d,  $J = 7.4$  Hz, 4H, ArH), 7.60–7.57 (m, 4H, ArH), 7.52–7.50 (m, 4H, ArH), 7.32 (d,  $J = 8.4$  Hz, 2H, ArH), 7.26 (s, 2H, C=CH), 4.45–4.43 (m, 1H, C–CH), 4.00–3.97 (m, 2H, C–CH<sub>2</sub>), 1.93 (s, 3H, C–CH<sub>3</sub>), 1.72–1.59 (m, 2H, C–CH<sub>2</sub>), 1.56–1.54 (m, 2H, C–CH<sub>2</sub>);  $^{13}\text{C NMR}$  (150 MHz,  $\text{DMSO-}d_6$ )  $\delta = 194.8, 194.8, 170.9, 142.5, 141.3, 141.3, 139.1, 139.1, 133.2, 133.2, 131.9, 131.9, 129.0, 129.0, 129.0, 129.0, 128.9, 128.9, 128.9, 128.9, 123.8, 123.8, 119.5, 118.9, 118.9, 64.4, 31.8, 29.9, 24.5, 21.2$ ; HRMS (TOF ES<sup>+</sup>):  $m/z$  calcd for  $\text{C}_{30}\text{H}_{26}\text{BrNO}_4$  [(M+H)<sup>+</sup>], 544.1118, found, 544.1112.

### 3-(3,5-Dibenzoyl-1-benzyl-1,4-dihydropyridin-4-yl)propyl acetate (4r)

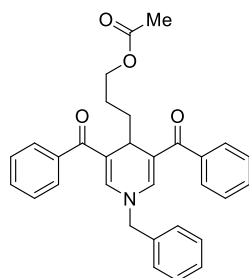

$V_{\text{Petroleum ether}}/V_{\text{Ethyl acetate}} = 6:1$ ,  $R_f = 0.5$ ; Yellow solid: 44 mg (46%); mp = 119–121 °C;  $^1\text{H NMR}$  (600

MHz, DMSO-*d*<sub>6</sub>)  $\delta$  = 7.56–7.54 (m, 2H, ArH), 7.50–7.46 (m, 8H, ArH), 7.41–7.43 (m, 2H, ArH), 7.35–7.32 (m, 1H, ArH), 7.23 (d, *J* = 7.5 Hz, 2H, ArH), 7.13 (s, 2H, C=CH), 4.73 (s, 2H, C-CH<sub>2</sub>), 4.33 (t, *J* = 5.2 Hz, 1H, C-CH), 3.91 (t, *J* = 6.5 Hz, 2H, C-CH<sub>2</sub>), 1.93 (s, 3H, C-CH<sub>3</sub>), 1.49–1.45 (m, 2H, CH<sub>2</sub>), 1.41–1.38 (m, 2H, CH<sub>2</sub>); <sup>13</sup>C NMR (150 MHz, DMSO-*d*<sub>6</sub>)  $\delta$  = 194.3, 194.3, 170.8, 144.4, 144.4, 139.6, 139.6, 137.6, 131.5, 131.5, 129.3, 129.3, 128.8, 128.8, 128.8, 128.8, 128.7, 128.7, 128.7, 128.7, 128.4, 127.9, 127.9, 116.7, 116.7, 64.5, 57.0, 31.8, 29.4, 24.5, 21.2; HRMS (TOF ES<sup>+</sup>): *m/z* calcd for C<sub>31</sub>H<sub>30</sub>NO<sub>4</sub> [(M+H)<sup>+</sup>], 480.2179, found, 480.2171.

### 3-(3,5-Dibenzoyl-1-cyclohexyl-1,4-dihydropyridin-4-yl)propyl acetate (4s)

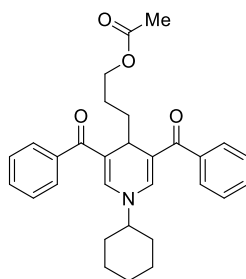

V<sub>Petroleum ether</sub>/V<sub>Ethyl acetate</sub> = 5:1, R<sub>f</sub> = 0.5; Yellow liquid: 52 mg (55%); <sup>1</sup>H NMR (600 MHz, DMSO-*d*<sub>6</sub>)  $\delta$  = 7.57–7.56 (m, 6H, ArH), 7.51–7.50 (m, 4H, ArH), 7.06 (s, 2H, C=CH), 4.36 (t, *J* = 5.2 Hz, 1H, C-CH), 3.96 (t, *J* = 6.6 Hz, 2H, C-CH<sub>2</sub>), 3.48–3.46 (m, 1H, C-CH), 1.93 (s, 3H, C-CH<sub>3</sub>), 1.78–1.74 (m, 2H, C-CH<sub>2</sub>), 1.69–1.65 (m, 2H, C-CH<sub>2</sub>), 1.59–1.46 (m, 4H, C-CH<sub>2</sub>), 1.44–1.40 (m, 2H, C-CH<sub>2</sub>), 1.26–1.20 (m, 4H, C-CH<sub>2</sub>); <sup>13</sup>C NMR (150 MHz, DMSO-*d*<sub>6</sub>)  $\delta$  = 194.4, 194.4, 170.9, 142.2, 142.2, 139.7, 139.7, 131.4, 131.4, 128.9, 128.9, 128.9, 128.9, 128.7, 128.7, 128.7, 128.7, 116.6, 116.6, 64.5, 62.3, 32.1, 32.1, 31.8, 29.9, 25.2, 25.2, 24.8, 24.3, 21.2, 21.2; HRMS (TOF ES<sup>+</sup>): *m/z* calcd for C<sub>30</sub>H<sub>33</sub>NO<sub>4</sub> [(M+H)<sup>+</sup>], 472.2482, found, 472.2487.

### 3-(3,3,6,6-tetramethyl-1,8-dioxo-10-(*p*-tolyl)-1,2,3,4,5,6,7,8,9,10-decahydroacridin-9-yl)propyl acetate (4t)

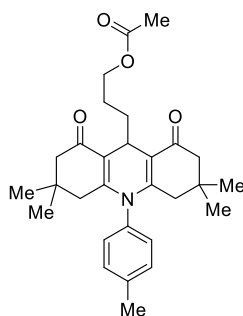

V<sub>Petroleum ether</sub>/V<sub>Ethyl acetate</sub> = 3:1, R<sub>f</sub> = 0.5; White solid: 57 mg (62%); mp = 159–160 °C; <sup>1</sup>H NMR (600 MHz, DMSO-*d*<sub>6</sub>)  $\delta$  = 7.39–7.04 (m, 4H, ArH), 3.97 (m, 3H, C-CH<sub>2</sub>+C-CH), 2.40 (s, 3H, ArCH<sub>3</sub>), 2.17 (t, *J* = 16.4 Hz, 4H, CH<sub>2</sub>), 2.08 (d, *J* = 16.0 Hz, 2H, C-CH<sub>2</sub>), 1.96 (s, 3H, C-CH<sub>3</sub>), 1.69 (d, *J* = 17.5 Hz, 2H, CH<sub>2</sub>), 1.53–1.45 (m, 2H, CH<sub>2</sub>), 1.35–1.27 (m, 2H, C-CH<sub>2</sub>), 0.88 (s, 6H, C-CH<sub>3</sub>), 0.86 (s, 6H, C-CH<sub>3</sub>); <sup>13</sup>C NMR (150 MHz, DMSO-*d*<sub>6</sub>)  $\delta$  = 195.9, 195.9, 170.8, 152.1, 152.1, 139.3, 136.3, 112.4, 112.4, 64.6, 64.6, 50.2, 50.2, 41.4, 41.4, 32.2, 32.2, 32.2, 31.9, 30.0, 30.0, 26.5, 26.5, 25.1, 24.9, 21.2, 21.2, 21.2, 21.2; HRMS (TOF ES<sup>+</sup>): *m/z* calcd for C<sub>29</sub>H<sub>37</sub>NO<sub>4</sub> [(M+H)<sup>+</sup>], 464.2795, found, 464.2801.

### 3-(3,5-Di(cyclopropanecarbonyl)-1-phenyl-1,4-dihydropyridin-4-yl)propyl acetate (4u)

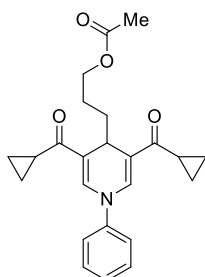

$V_{\text{Petroleum ether}}/V_{\text{Ethyl acetate}} = 4:1$ ,  $R_f = 0.5$ ; Yellow solid: 40 mg (51%); mp = 110-112 °C;  $^1\text{H NMR}$  (600 MHz,  $\text{DMSO-}d_6$ )  $\delta = 8.08$  (s, 2H, C=CH), 7.61 (d,  $J = 7.9$  Hz, 2H, ArH), 7.52 (t,  $J = 7.7$  Hz, 2H, ArH), 7.35 (t,  $J = 7.4$  Hz, 1H, ArH), 4.06 (t,  $J = 5.2$  Hz, 1H, C-CH), 3.88 (t,  $J = 6.6$  Hz, 2H, C-CH<sub>2</sub>), 2.75–2.73 (m, 2H, C-CH<sub>2</sub>), 1.94 (s, 3H, C-CH<sub>3</sub>), 1.41–1.35 (m, 2H, C-CH<sub>2</sub>), 1.27–1.20 (m, 2H, C-CH<sub>2</sub>), 0.97–0.72 (m, 8H, CH<sub>2</sub>);  $^{13}\text{C NMR}$  (150 MHz,  $\text{DMSO-}d_6$ )  $\delta = 197.4$ , 197.4, 170.8, 143.2, 138.7, 138.7, 130.1, 130.1, 126.7, 121.9, 121.9, 120.0, 120.0, 64.5, 31.9, 28.3, 24.2, 21.2, 15.6, 15.6, 10.3, 10.3, 10.3, 10.3; HRMS (TOF ES<sup>+</sup>): m/z calcd for  $\text{C}_{24}\text{H}_{27}\text{NO}_4$  [(M+H)<sup>+</sup>], 394.2013, found, 394.2019.

### 3-(3,5-Bis(3-methylbutanoyl)-1-(*p*-tolyl)-1,4-dihydropyridin-4-yl)propyl acetate (4v)

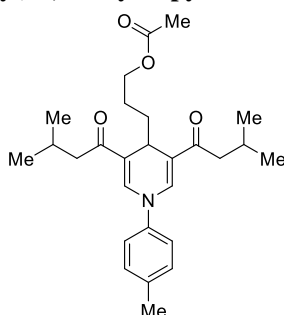

$V_{\text{Petroleum ether}}/V_{\text{Ethyl acetate}} = 4:1$ ,  $R_f = 0.5$ ; Yellow solid: 45 mg (53%); mp = 115-117 °C;  $^1\text{H NMR}$  (600 MHz,  $\text{DMSO-}d_6$ )  $\delta = 7.78$  (s, 2H, C=CH), 7.42 (d,  $J = 8.0$  Hz, 2H, ArH), 7.32 (d,  $J = 8.0$  Hz, 2H, ArH), 4.07 (t,  $J = 5.0$  Hz, 1H, C-CH), 3.88 (t,  $J = 6.6$  Hz, 2H, C-CH<sub>2</sub>), 2.68–2.64 (m, 2H, C-CH<sub>2</sub>), 2.48–2.47 (m, 1H, ArH), 2.35 (s, 3H, ArCH<sub>3</sub>), 2.07–2.03 (m, 2H, C-CH<sub>2</sub>), 1.92 (s, 3H, C-CH<sub>3</sub>), 1.38–1.35 (m, 2H, C-CH<sub>2</sub>), 1.24–1.21 (m, 2H, C-CH<sub>2</sub>), 0.88–0.86 (m, 12H, C-CH<sub>3</sub>);  $^{13}\text{C NMR}$  (150 MHz,  $\text{DMSO-}d_6$ )  $\delta = 198.1$ , 198.1, 170.8, 140.9, 139.2, 139.2, 136.2, 130.5, 130.5, 130.5, 121.9, 121.9, 121.9, 119.2, 119.2, 64.4, 45.4, 45.4, 31.5, 27.8, 25.9, 25.9, 24.1, 22.9, 22.9, 22.9, 22.9, 21.1, 20.9; HRMS (TOF ES<sup>+</sup>): m/z calcd for  $\text{C}_{26}\text{H}_{35}\text{NO}_4$  [(M+H)<sup>+</sup>], 440.2795, found, 440.2804.

### 3-(3,5-Dibenzoyl-1-phenyl-1,4-dihydropyridin-4-yl)propyl 2-chloroacetate (4w)

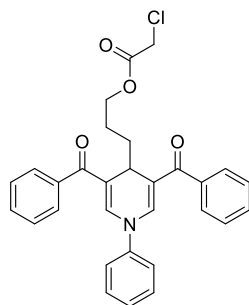

$V_{\text{Petroleum ether}}/V_{\text{Ethyl acetate}} = 5:1$ ,  $R_f = 0.5$ ; Yellow solid: 51 mg (51%); mp = 119–121 °C;  $^1\text{H NMR}$  (600 MHz,  $\text{DMSO-}d_6$ )  $\delta = 7.69\text{--}7.67$  (m, 4H, ArH), 7.61–7.54 (m, 2H, ArH), 7.52–7.49 (m, 4H, ArH), 7.42–7.36 (m, 3H, ArH), 7.33–7.29 (m, 2H, ArH), 7.25 (s, 2H, C=CH), 4.46–4.42 (m, 1H, C–CH), 4.33–4.29 (m, 2H, C–CH<sub>2</sub>), 4.14–4.09 (m, 2H, C–CH<sub>2</sub>), 1.69–1.64 (m, 2H, C–CH<sub>2</sub>), 1.59–1.55 (m, 2H, C–CH<sub>2</sub>);  $^{13}\text{C NMR}$  (150 MHz,  $\text{DMSO-}d_6$ )  $\delta = 194.8, 194.8, 167.9, 143.2, 141.8, 141.8, 139.2, 139.2, 131.8, 131.8, 130.5, 130.5, 129.0, 129.0, 129.0, 129.0, 128.9, 128.9, 128.9, 128.9, 127.2, 121.6, 121.6, 118.7, 118.7, 66.2, 41.6, 31.9, 29.8, 24.4$ ; HRMS (TOF ES<sup>+</sup>):  $m/z$  calcd for  $\text{C}_{30}\text{H}_{26}\text{ClNO}_4$  [(M+H)<sup>+</sup>], 500.1623, found, 500.1626.

### 3-(3,5-dibenzoyl-1-phenyl-1,4-dihydropyridin-4-yl)propyl propionate (4x)

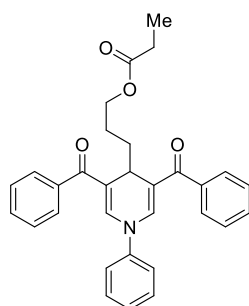

$V_{\text{Petroleum ether}}/V_{\text{Ethyl acetate}} = 5:1$ ,  $R_f = 0.5$ ; Yellow solid: 58 mg (61%); mp = 130–132 °C;  $^1\text{H NMR}$  (600 MHz,  $\text{DMSO-}d_6$ )  $\delta = 7.68$  (d,  $J = 7.5$  Hz, 4H, ArH), 7.58–7.56 (m, 2H, ArH), 7.52–7.49 (m, 4H, ArH), 7.40 (t,  $J = 7.7$  Hz, 2H, ArH), 7.31 (d,  $J = 7.9$  Hz, 2H, ArH), 7.28–7.26 (m, 2H, ArH+C=CH), 4.45 (t,  $J = 5.1$  Hz, 1H, C–CH), 4.01 (t,  $J = 6.4$  Hz, 2H, C–CH<sub>2</sub>), 2.22–2.20 (m, 2H, C–CH<sub>2</sub>), 1.67–1.63 (m, 2H, C–CH<sub>2</sub>), 1.58–1.54 (m, 2H, C–CH<sub>2</sub>), 0.94 (t,  $J = 7.5$  Hz, 3H, C–CH<sub>3</sub>);  $^{13}\text{C NMR}$  (150 MHz,  $\text{DMSO-}d_6$ )  $\delta = 194.8, 194.8, 174.1, 143.2, 141.7, 141.7, 139.2, 139.2, 131.8, 131.8, 130.5, 130.5, 129.0, 129.0, 129.0, 129.0, 129.0, 128.9, 128.9, 128.9, 128.9, 127.2, 121.6, 121.6, 118.7, 118.7, 64.3, 31.7, 29.9, 27.3, 24.6, 9.5$ ; HRMS (TOF ES<sup>+</sup>):  $m/z$  calcd for  $\text{C}_{31}\text{H}_{29}\text{NO}_4$  [(M+H)<sup>+</sup>], 480.2169, found, 480.2173.

### 3-(3,5-Dibenzoyl-1-phenyl-1,4-dihydropyridin-4-yl)propyl isobutyrate (4y)

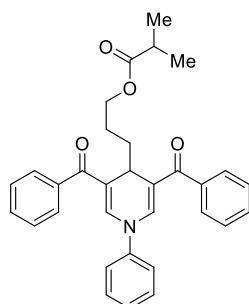

$V_{\text{Petroleum ether}}/V_{\text{Ethyl acetate}} = 5:1$ ,  $R_f = 0.5$ ; Yellow solid: 59 mg (60%); mp = 148–150 °C;  $^1\text{H NMR}$  (600 MHz,  $\text{DMSO-}d_6$ )  $\delta = 7.67$  (d,  $J = 7.4$  Hz, 4H, ArH), 7.58–7.56 (m, 2H, ArH), 7.51–7.49 (m, 4H, ArH), 7.42–7.39 (m, 2H, ArH), 7.31–7.30 (m, 2H, ArH), 7.28–7.25 (m, 3H, ArH+C=CH), 4.45 (t,  $J = 5.2$  Hz, 1H, C-CH), 4.02 (t,  $J = 6.2$  Hz, 2H, C-CH<sub>2</sub>), 2.43–2.42 (m, 1H, C-CH), 1.67–1.63 (m, 2H, C-CH<sub>2</sub>), 1.60–1.50 (m, 2H, C-CH<sub>2</sub>), 0.98 (d,  $J = 7.0$  Hz, C-CH<sub>3</sub>);  $^{13}\text{C NMR}$  (150 MHz,  $\text{DMSO-}d_6$ )  $\delta = 194.8$ , 194.8, 176.6, 143.2, 141.8, 141.8, 139.2, 139.2, 131.8, 131.8, 130.5, 130.5, 129.0, 129.0, 129.0, 129.0, 128.9, 128.9, 128.9, 127.2, 121.6, 121.6, 118.6, 118.6, 64.2, 33.6, 31.6, 29.9, 24.5, 19.2, 19.2; HRMS (TOF ES<sup>+</sup>):  $m/z$  calcd for  $\text{C}_{30}\text{H}_{26}\text{ClNO}_4$  [(M+H)<sup>+</sup>], 494.2326, found, 494.2332.

### 3-(3,5-Dibenzoyl-1-phenyl-1,4-dihydropyridin-4-yl)propyl pivalate (4z)

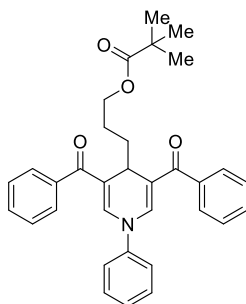

$V_{\text{Petroleum ether}}/V_{\text{Ethyl acetate}} = 4:1$ ,  $R_f = 0.5$ ; Yellow solid: 43 mg (41%); mp = 174–176 °C  $^1\text{H NMR}$  (600 MHz,  $\text{CDCl}_3$ )  $\delta = 7.65$ –7.64 (m, 4H, ArH), 7.51–7.50 (m, 2H, ArH), 7.47–7.45 (m, 4H, ArH), 7.38–7.36 (m, 2H, ArH), 7.27–7.22 (m, 2H, ArH+C=CH), 7.08–7.07 (m, 2H, ArH), 4.48–4.46 (m, 1H, C-CH), 4.08–4.06 (m, 2H, C-CH<sub>2</sub>), 1.75–1.73 (m, 4H, C-CH<sub>2</sub>), 1.12 (s, 9H, C-CH<sub>3</sub>);  $^{13}\text{C NMR}$  (150 MHz,  $\text{CDCl}_3$ )  $\delta = 195.0$ , 195.0, 178.7, 143.0, 141.0, 141.0, 139.2, 139.2, 131.2, 131.2, 130.1, 130.1, 128.5, 128.5, 128.5, 128.5, 128.5, 128.5, 128.5, 126.8, 121.0, 121.0, 119.8, 119.8, 64.4, 38.7, 31.7, 30.4, 27.2, 27.2, 27.2, 24.8; HRMS (TOF ES<sup>+</sup>):  $m/z$  calcd for  $\text{C}_{34}\text{H}_{35}\text{NO}_4$  [(M+Na)<sup>+</sup>], 530.2307, found, 530.2312.

### 4-(3,5-Dibenzoyl-1-phenyl-1,4-dihydropyridin-4-yl)butan-2-yl acetate (4a')

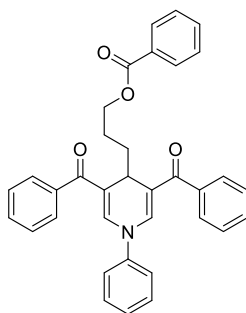

$V_{\text{Petroleum ether}}/V_{\text{Ethyl acetate}} = 5:1$ ,  $R_f = 0.5$ ; Yellow solid: 60 mg (57%); mp = 136–138 °C;  $^1\text{H NMR}$  (600 MHz,  $\text{DMSO-}d_6$ )  $\delta = 7.69$  (d,  $J = 7.6$  Hz, 4H, ArH), 7.58 (t,  $J = 7.4$  Hz, 2H, ArH), 7.52 (t,  $J = 7.5$  Hz, 4H, ArH), 7.41 (t,  $J = 7.7$  Hz, 2H, ArH), 7.33 (d,  $J = 7.9$  Hz, 2H, CH=CH<sub>2</sub>), 7.28 (m, 3H, ArH), , 4.46 (t,  $J = 5.2$  Hz, 1H, C-CH), 4.00 (t,  $J = 6.5$  Hz, 2H, CH<sub>2</sub>), 1.94 (s, 3H, CH<sub>3</sub>), 1.69–1.62 (m, 2H, CH<sub>2</sub>), 1.58–1.55 (m, 2H, CH<sub>2</sub>);  $^{13}\text{C NMR}$  (150 MHz,  $\text{DMSO-}d_6$ )  $\delta = 194.8$ , 194.8, 170.9, 143.2, 141.7, 141.7, 139.2, 139.2, 131.8, 131.8, 130.5, 130.5, 129.0, 129.0, 129.0, 129.0, 128.9, 128.9, 128.9, 128.9, 127.2, 121.6, 121.6, 118.7, 118.7, 64.5, 31.9, 29.9, 24.5, 21.2; HRMS (TOF ES<sup>+</sup>):  $m/z$  calcd for  $\text{C}_{30}\text{H}_{27}\text{NO}_4$  [(M+H)<sup>+</sup>], 528.2196, found, 528.2181.

**4-(3,5-Dibenzoyl-1-phenyl-1,4-dihydropyridin-4-yl)butyl acetate (4b')**

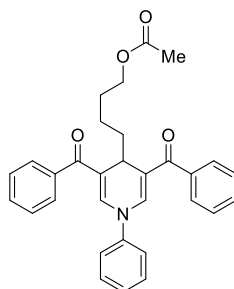

$V_{\text{Petroleum ether}}/V_{\text{Ethyl acetate}} = 6:1$ ,  $R_f = 0.5$ ; Yellow solid: 55 mg (57%); mp = 121–123 °C;  $^1\text{H NMR}$  (600 MHz,  $\text{DMSO-}d_6$ )  $\delta = 7.72\text{--}7.65$  (m, 4H, ArH), 7.58 (t,  $J = 6.9$  Hz, 2H, ArH), 7.51 (m,  $J = 9.8, 5.2$  Hz, 4H, ArH), 7.45–7.37 (m, 2H, ArH), 7.33 (s, 2H, C=CH), 7.29–7.24 (m, 2H, ArH), 4.42 (t,  $J = 5.4$  Hz, 1H, C–CH), 3.96 (t, 2H, C–CH<sub>2</sub>), 1.90 (s, 3H, C–CH<sub>3</sub>), 1.58–1.52 (m, 4H, C–CH<sub>2</sub>), 1.40–1.38 (m, 2H, C–CH<sub>2</sub>);  $^{13}\text{C NMR}$  (150 MHz,  $\text{DMSO-}d_6$ )  $\delta = 194.8, 194.8, 170.8, 143.3, 141.5, 141.5, 139.2, 139.2, 131.8, 131.8, 130.5, 130.5, 129.0, 129.0, 129.0, 129.0, 128.9, 128.9, 128.9, 128.9, 127.2, 121.6, 121.6, 119.0, 119.0, 64.1, 35.4, 30.1, 28.5, 21.4, 21.1$ ; HRMS (TOF ES<sup>+</sup>):  $m/z$  calcd for  $\text{C}_{31}\text{H}_{29}\text{NO}_4$  [(M+H)<sup>+</sup>], 480.2169, found, 480.2180.

**4-(3-Hydroxypropyl)-1-phenyl-1,4-dihydropyridine-3,5-diylbis(phenylmethanone) (5)**

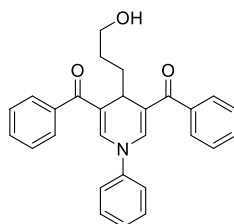

$V_{\text{Petroleum ether}}/V_{\text{Ethyl acetate}} = 5:1$ ,  $R_f = 0.2$ ; Yellow solid: 35 mg (42%); mp = 160–162 °C;  $^1\text{H NMR}$  (600 MHz,  $\text{CDCl}_3$ ):  $\delta = 7.67\text{--}7.65$  (m, 4H, ArH), 7.53–7.50 (m, 2H, ArH), 7.46–7.44 (m, 4H, ArH), 7.38–7.36 (m, 2H, ArH), 7.25 (s, 2H, C=CH), 7.08–7.07 (m, 2H, ArH), 4.66 (t,  $J = 5.3$  Hz, 1H, C–CH), 3.72 (t,  $J = 6.4$  Hz, 2H, OCH<sub>2</sub>), 1.76–1.72 (m, 2H, C–CH<sub>2</sub>), 1.68–1.63 (m, 2H, C–CH<sub>2</sub>);  $^{13}\text{C NMR}$  (150 MHz,  $\text{DMSO-}d_6$ ):  $\delta = 194.9, 194.9, 143.3, 141.4, 141.4, 139.3, 139.3, 131.8, 131.8, 130.5, 130.5, 129.0, 129.0, 129.0, 129.0, 128.9, 128.9, 128.9, 128.9, 127.1, 121.5, 121.5, 119.2, 119.2, 61.5, 32.3, 30.2, 28.8$ ; HRMS (TOF ES<sup>+</sup>):  $m/z$  calcd for  $\text{C}_{28}\text{H}_{25}\text{NO}_3$  [(M+H)<sup>+</sup>], 424.1907, found, 424.1906.

**4.  $^1\text{H}$  NMR and  $^{13}\text{C}$  NMR spectra for spectroscopic data.**



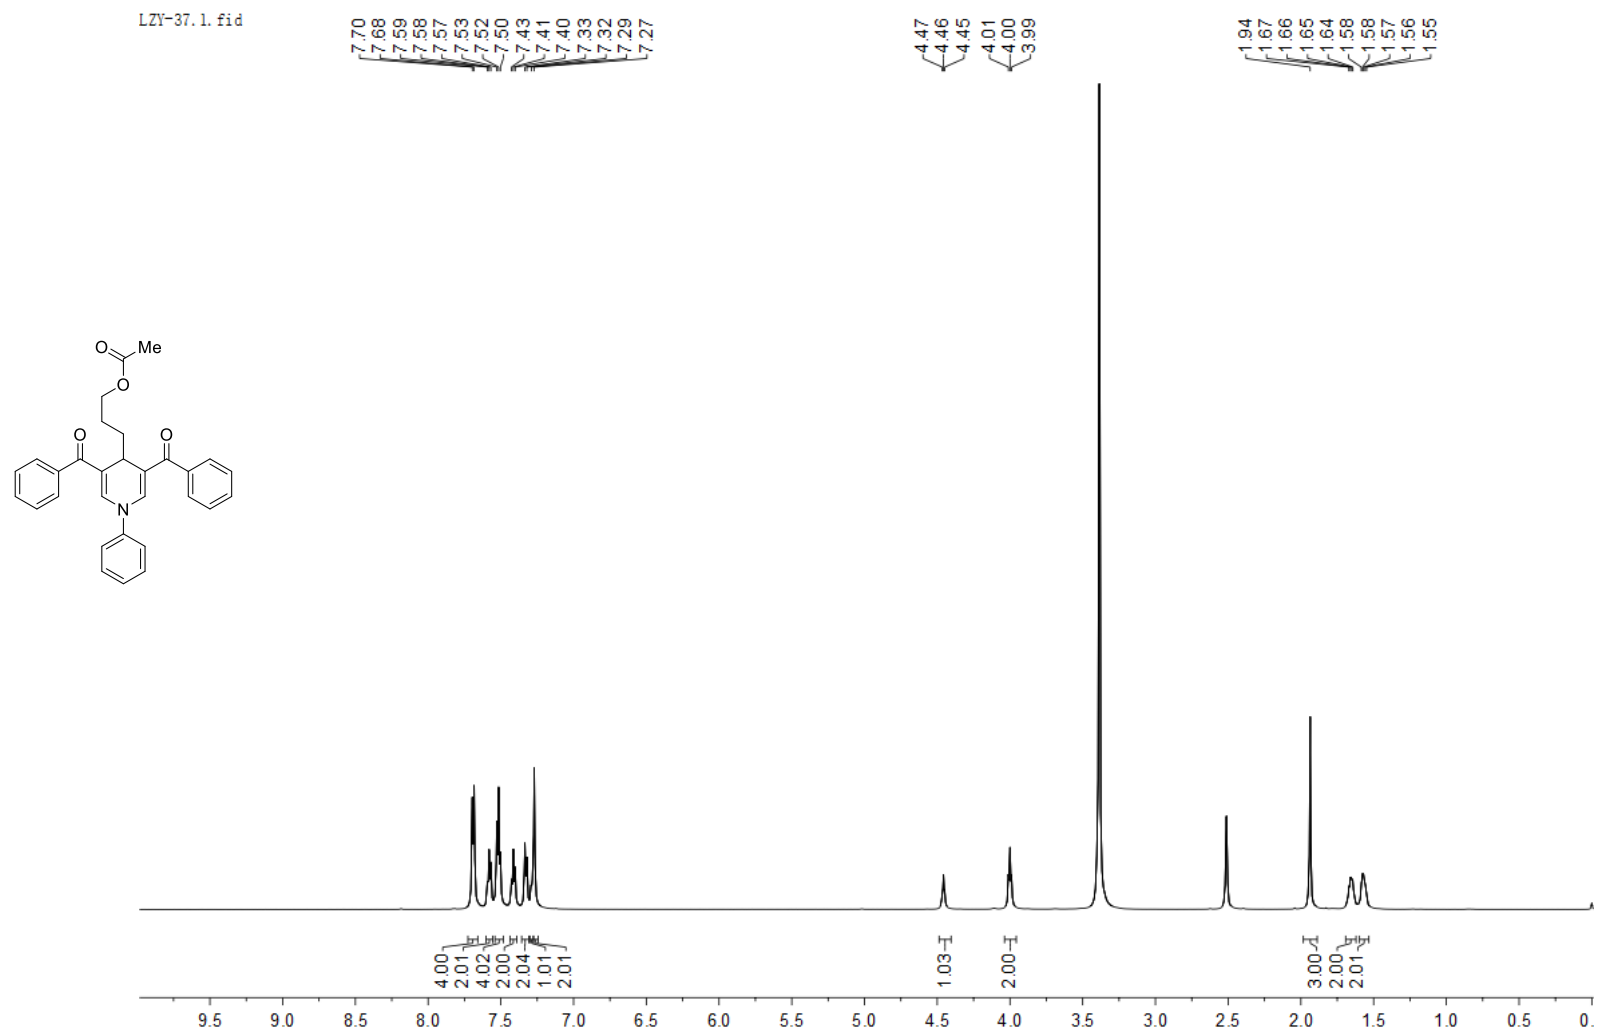

**Figure S1.**  $^1\text{H}$  NMR (600 MHz,  $\text{DMSO-}d_6$ ) spectra of compound **4a**

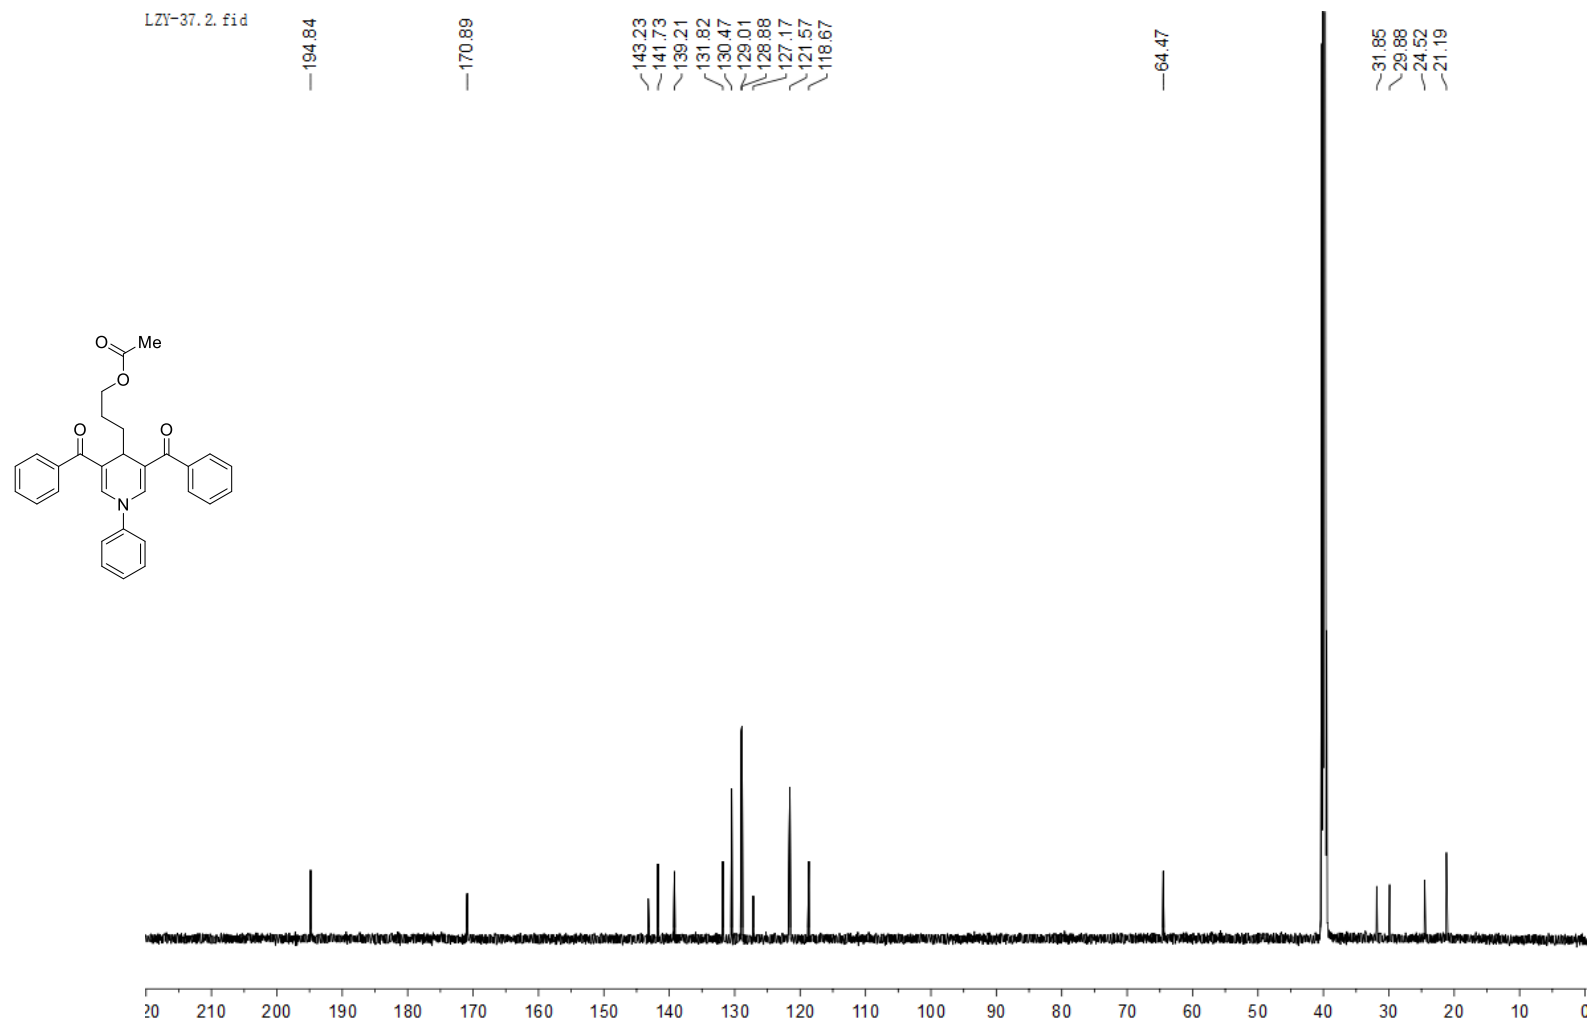

Figure S2.  $^{13}\text{C}$  NMR (150 MHz,  $\text{DMSO-}d_6$ ) spectra of compound **4a**

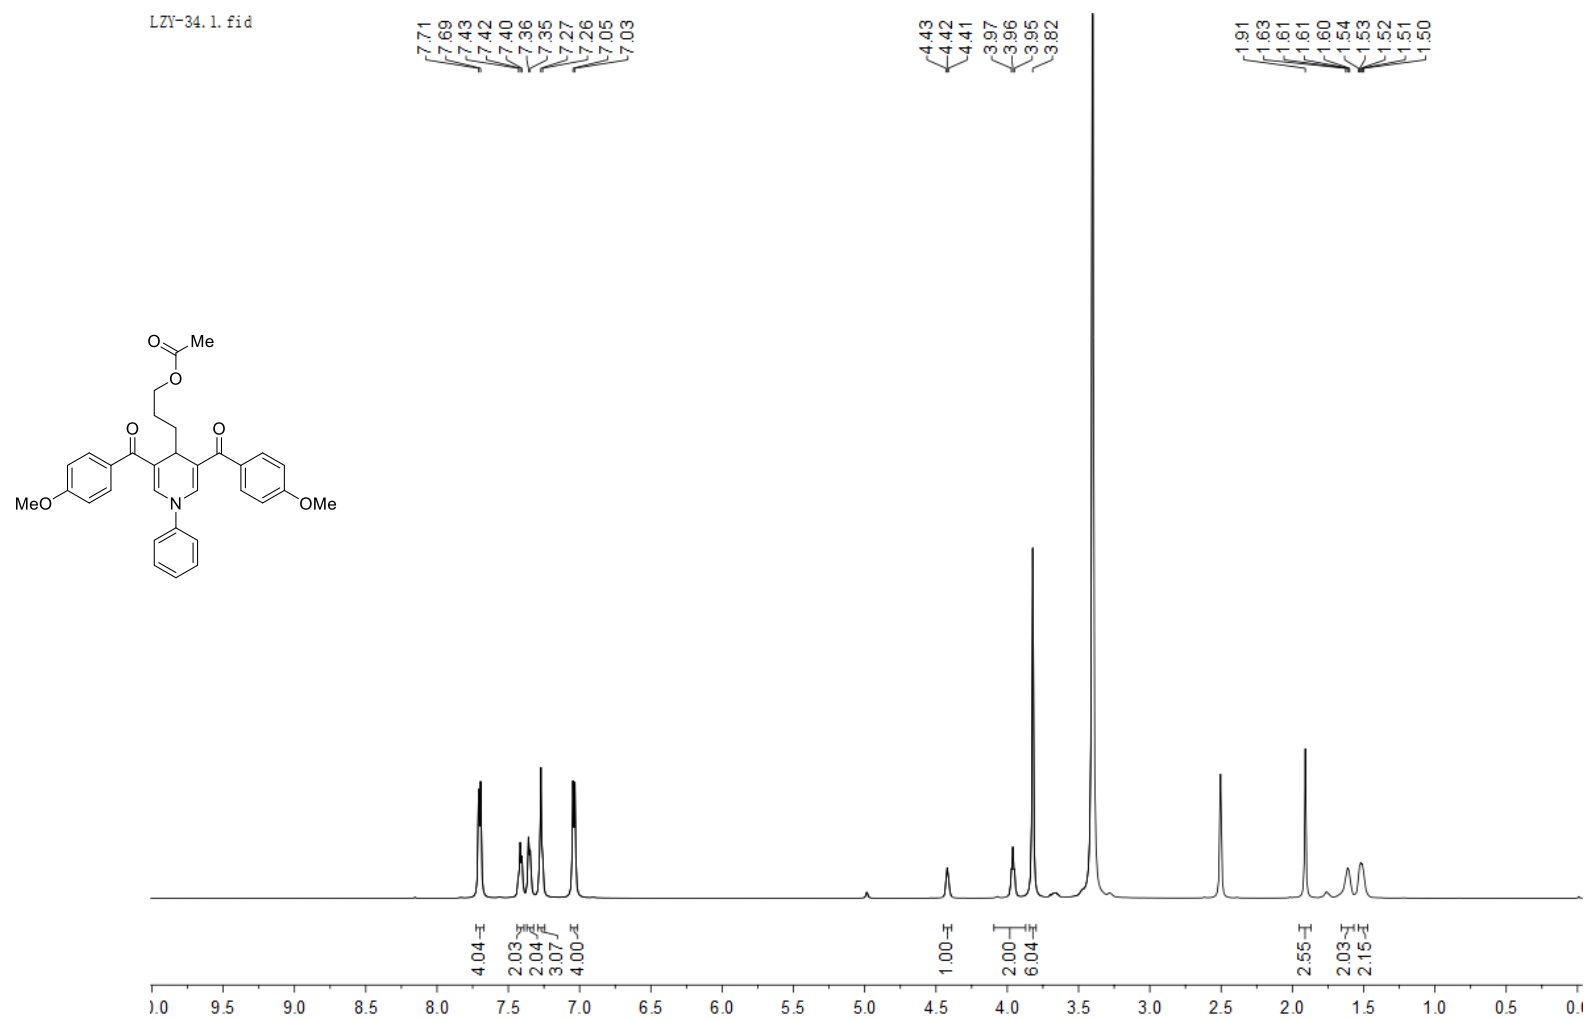

**Figure S3.**  $^1\text{H}$  NMR (600 MHz,  $\text{DMSO-}d_6$ ) spectra of compound **4b**

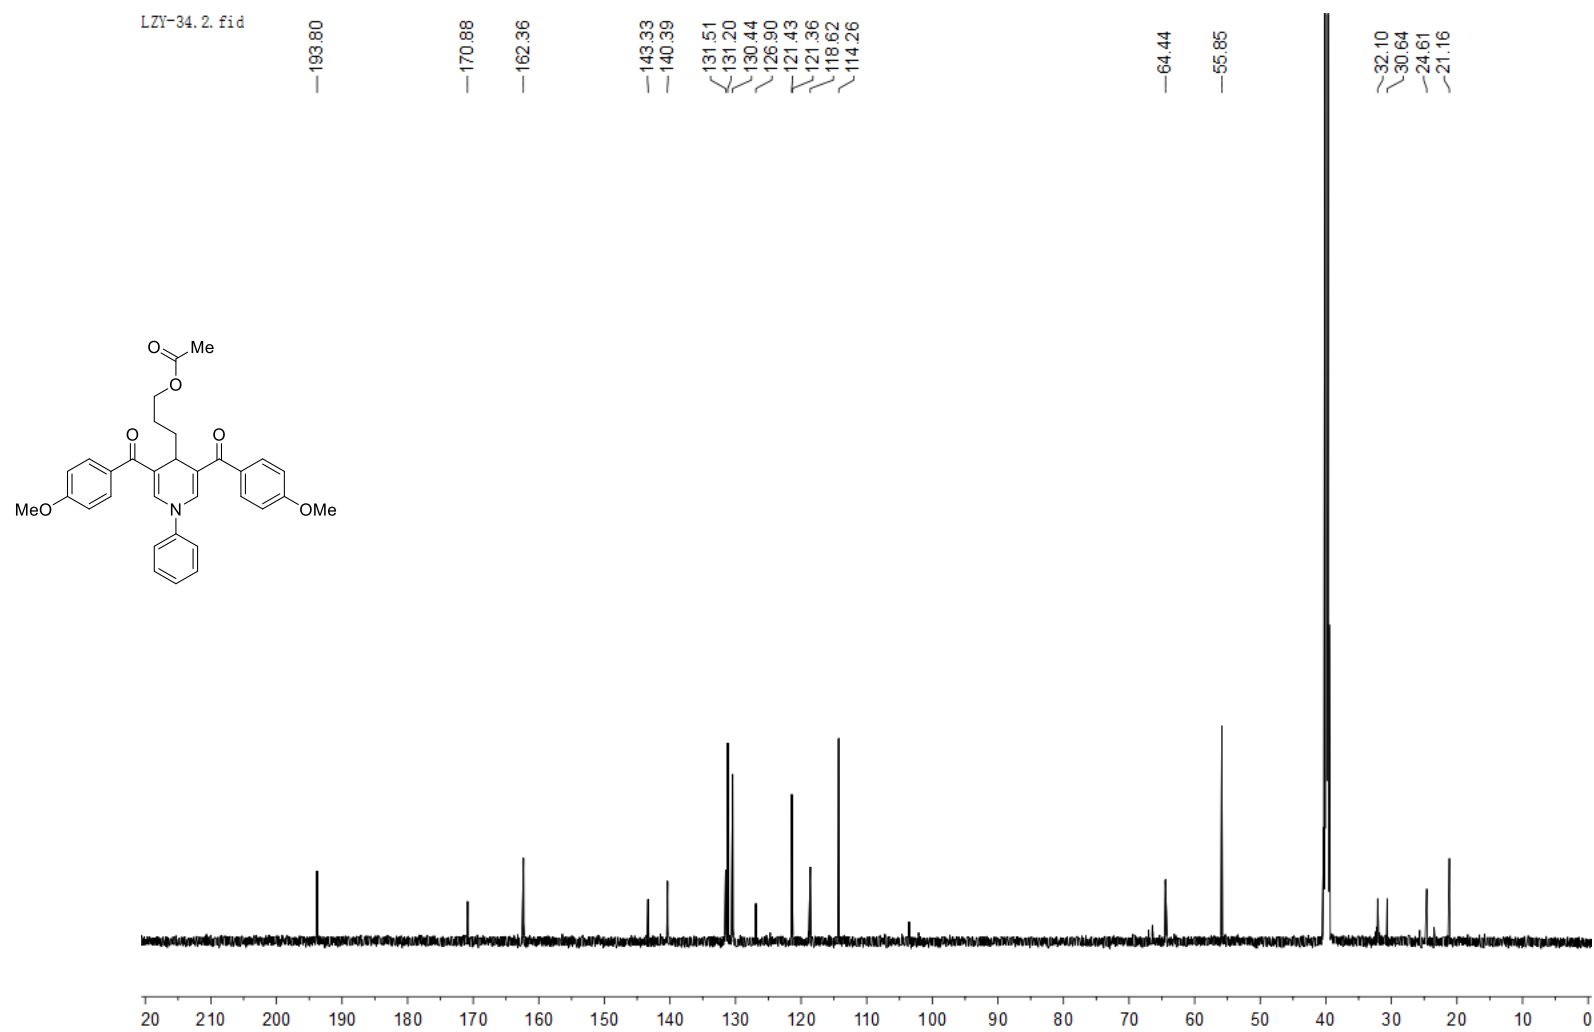

**Figure S4.**  $^{13}\text{C}$  NMR (150 MHz,  $\text{DMSO-}d_6$ ) spectra of compound **4b**

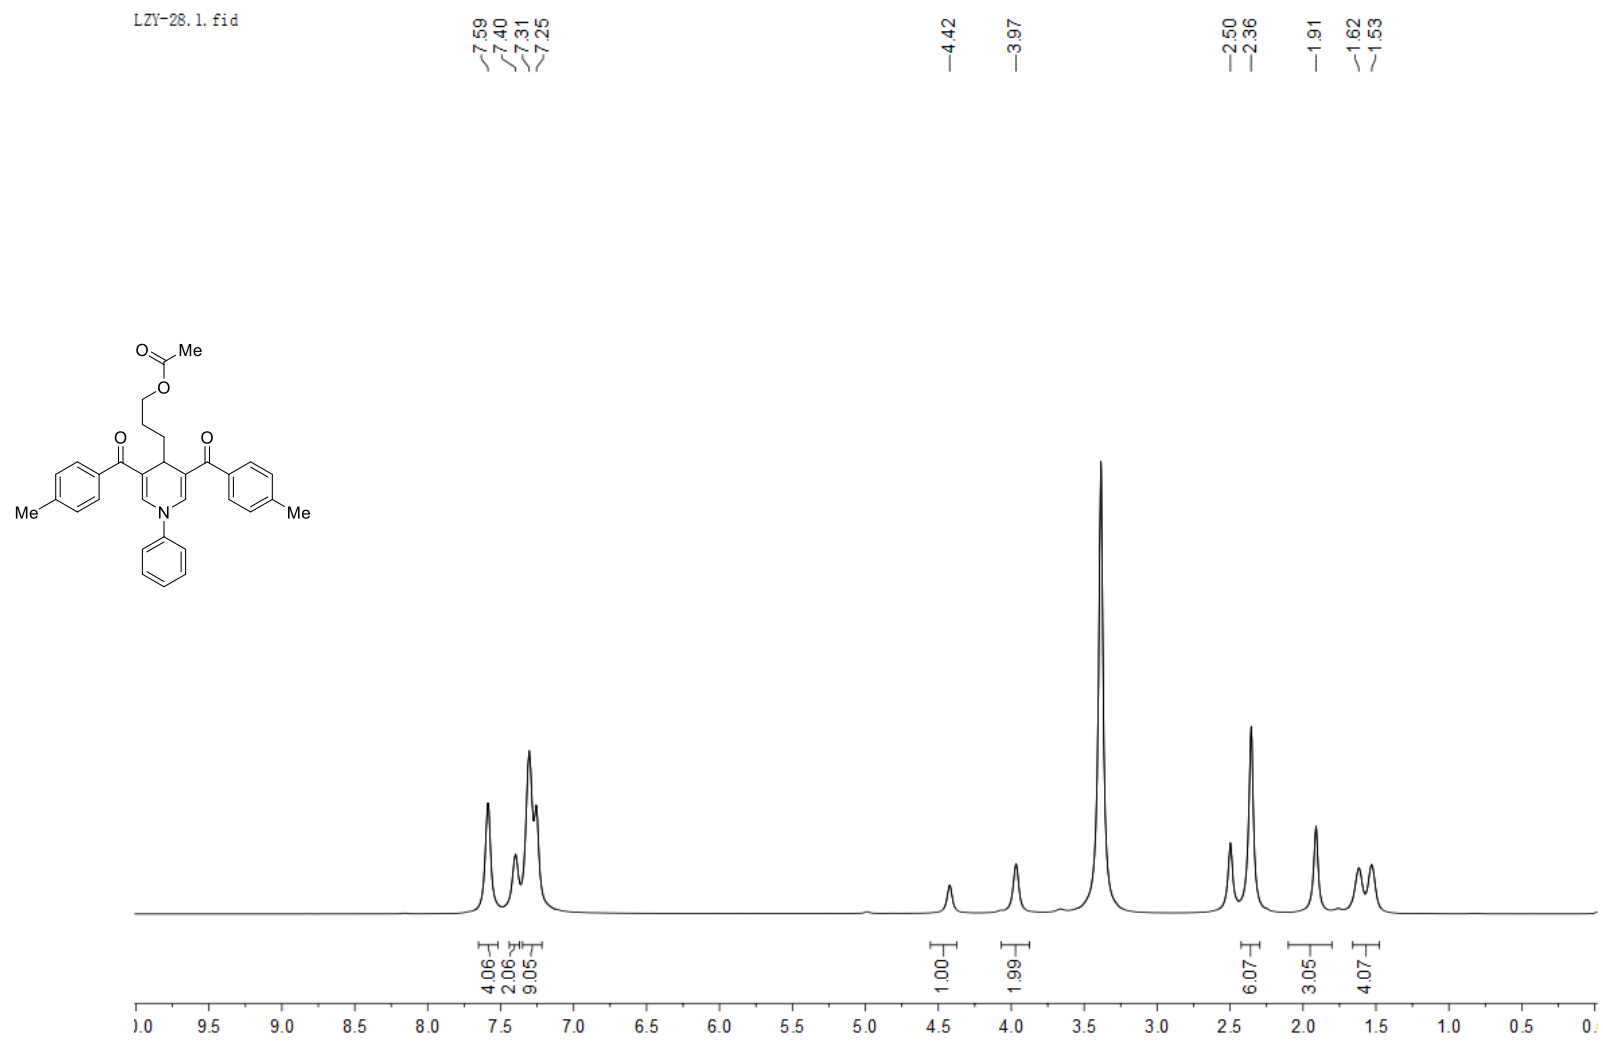

Figure S5. <sup>1</sup>H NMR (600 MHz, DMSO-*d*<sub>6</sub>) spectra of compound **4c**

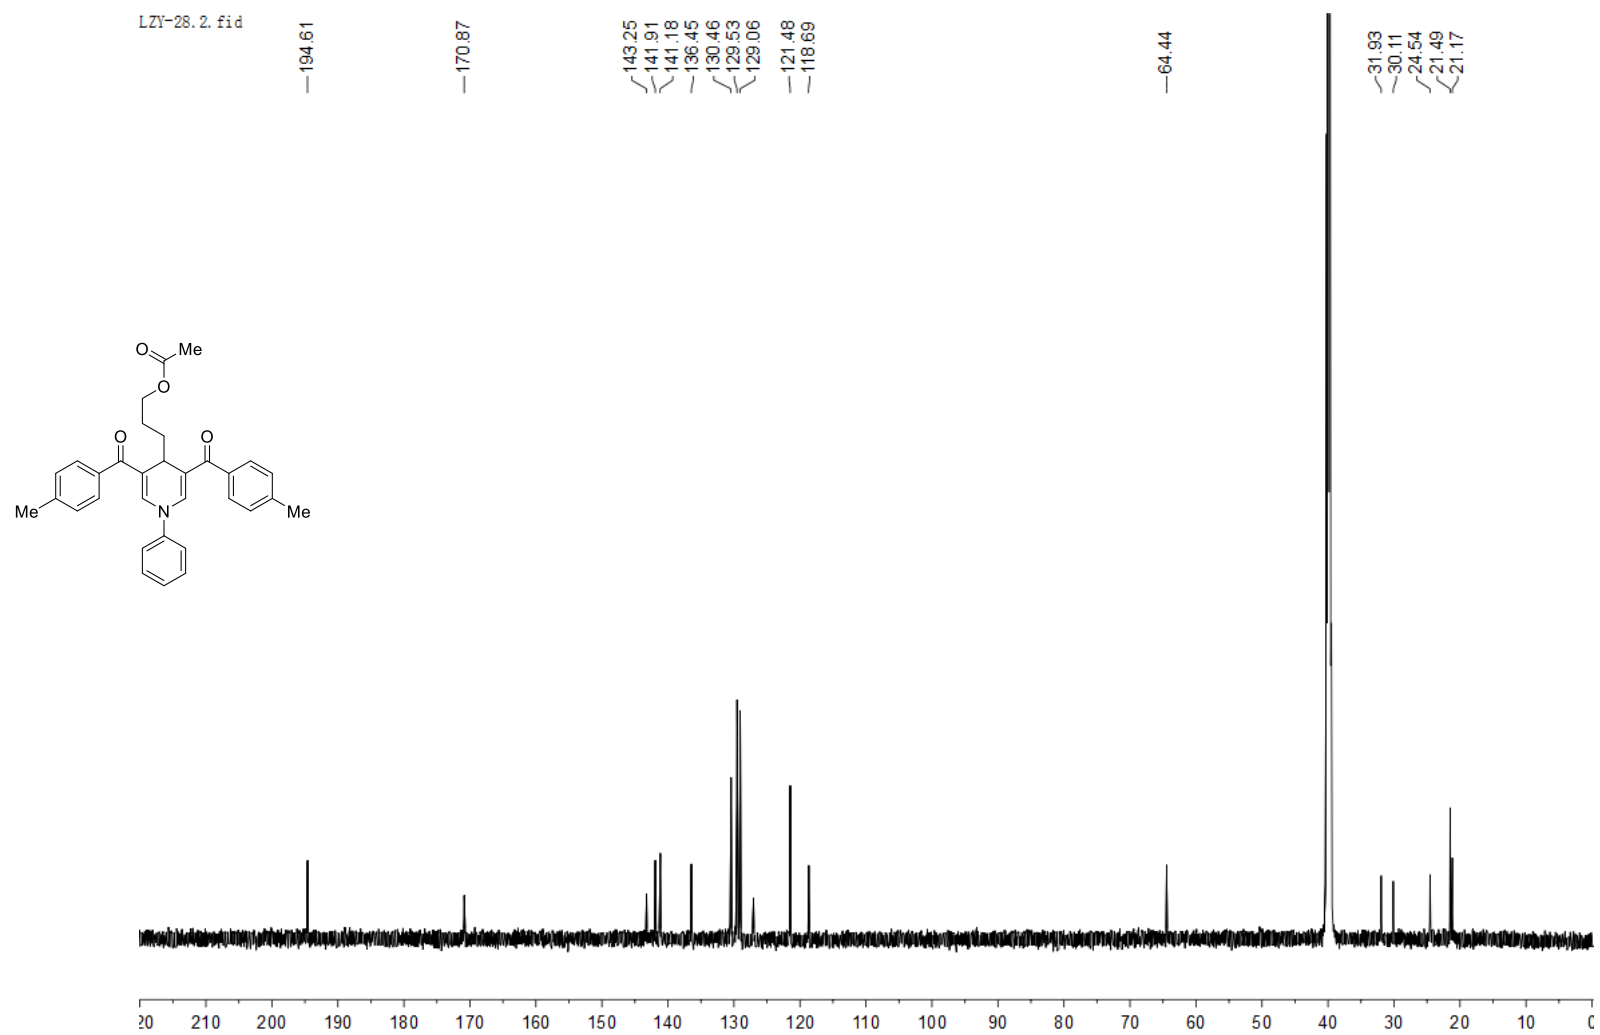

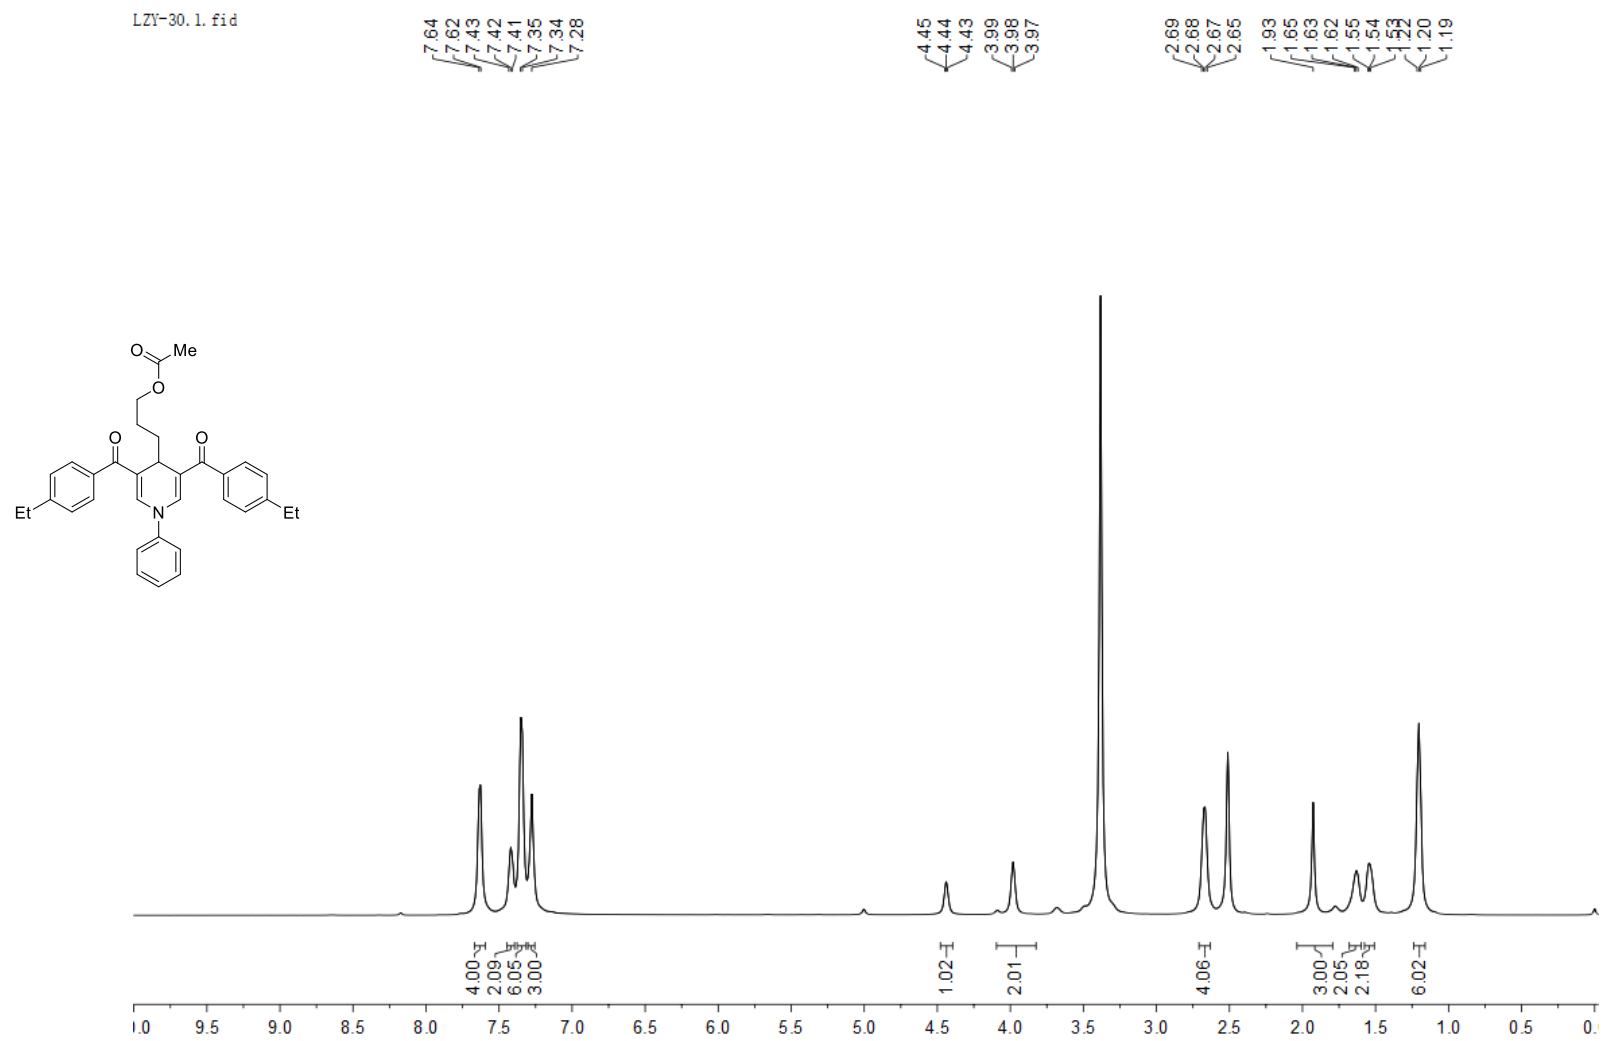

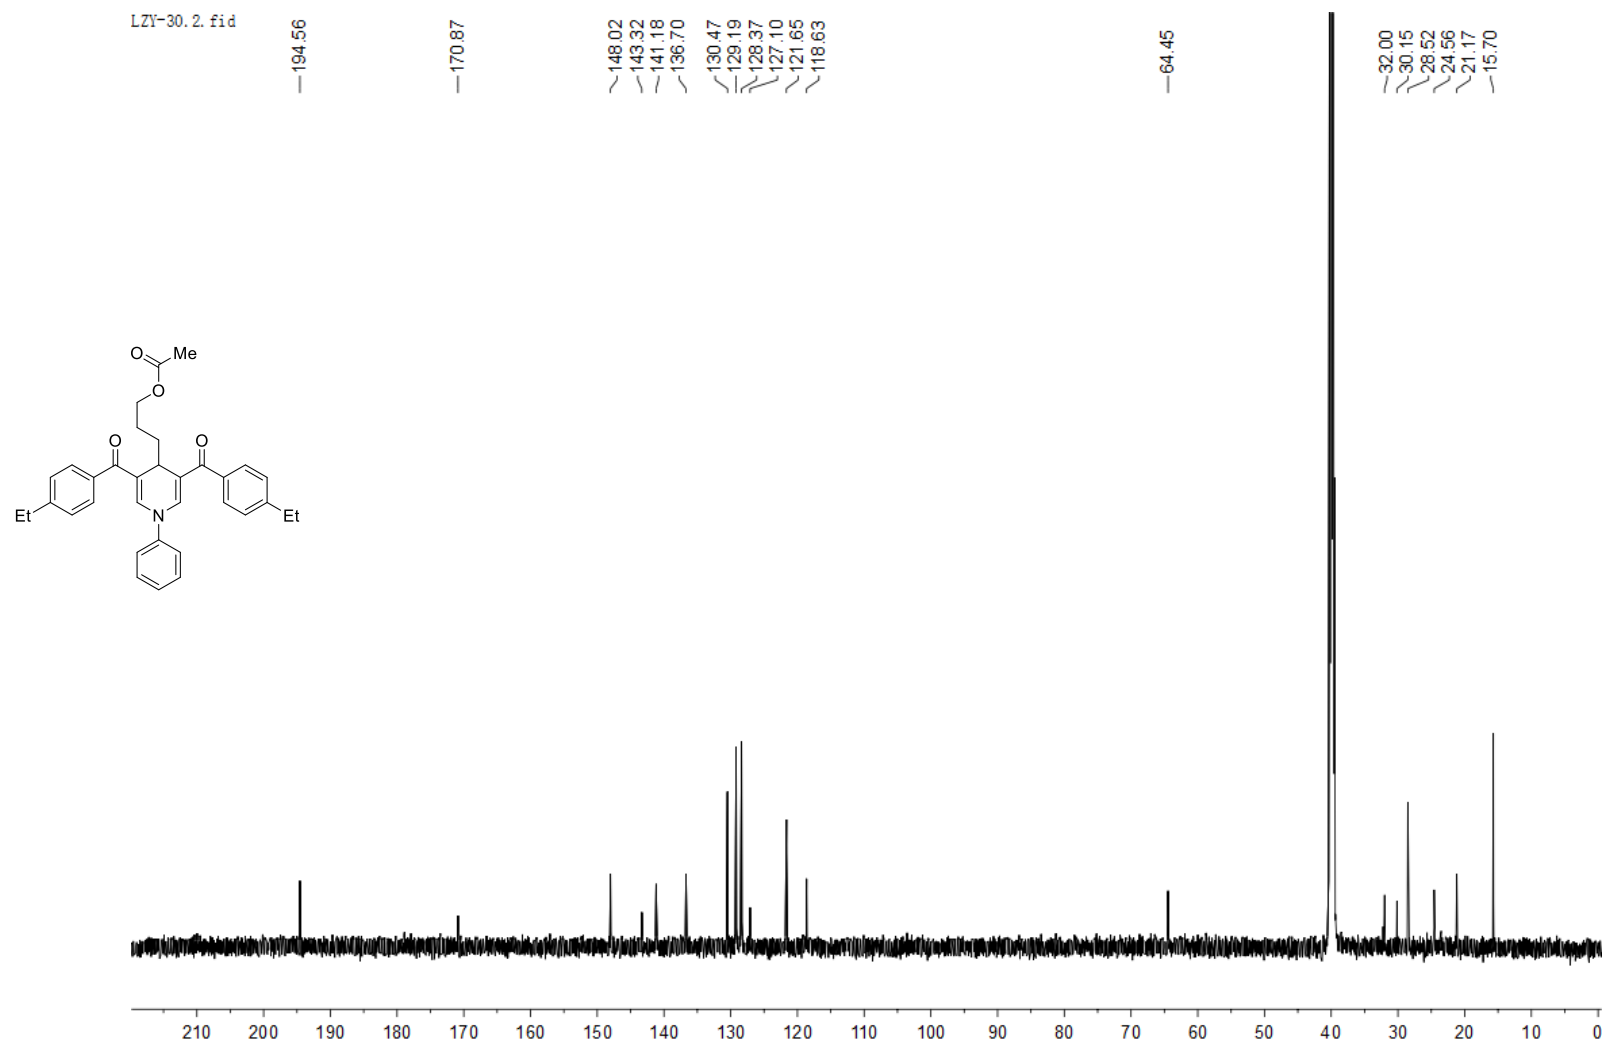

**Figure S8.**  $^{13}\text{C}$  NMR (150 MHz,  $\text{DMSO-}d_6$ ) spectra of compound **4d**



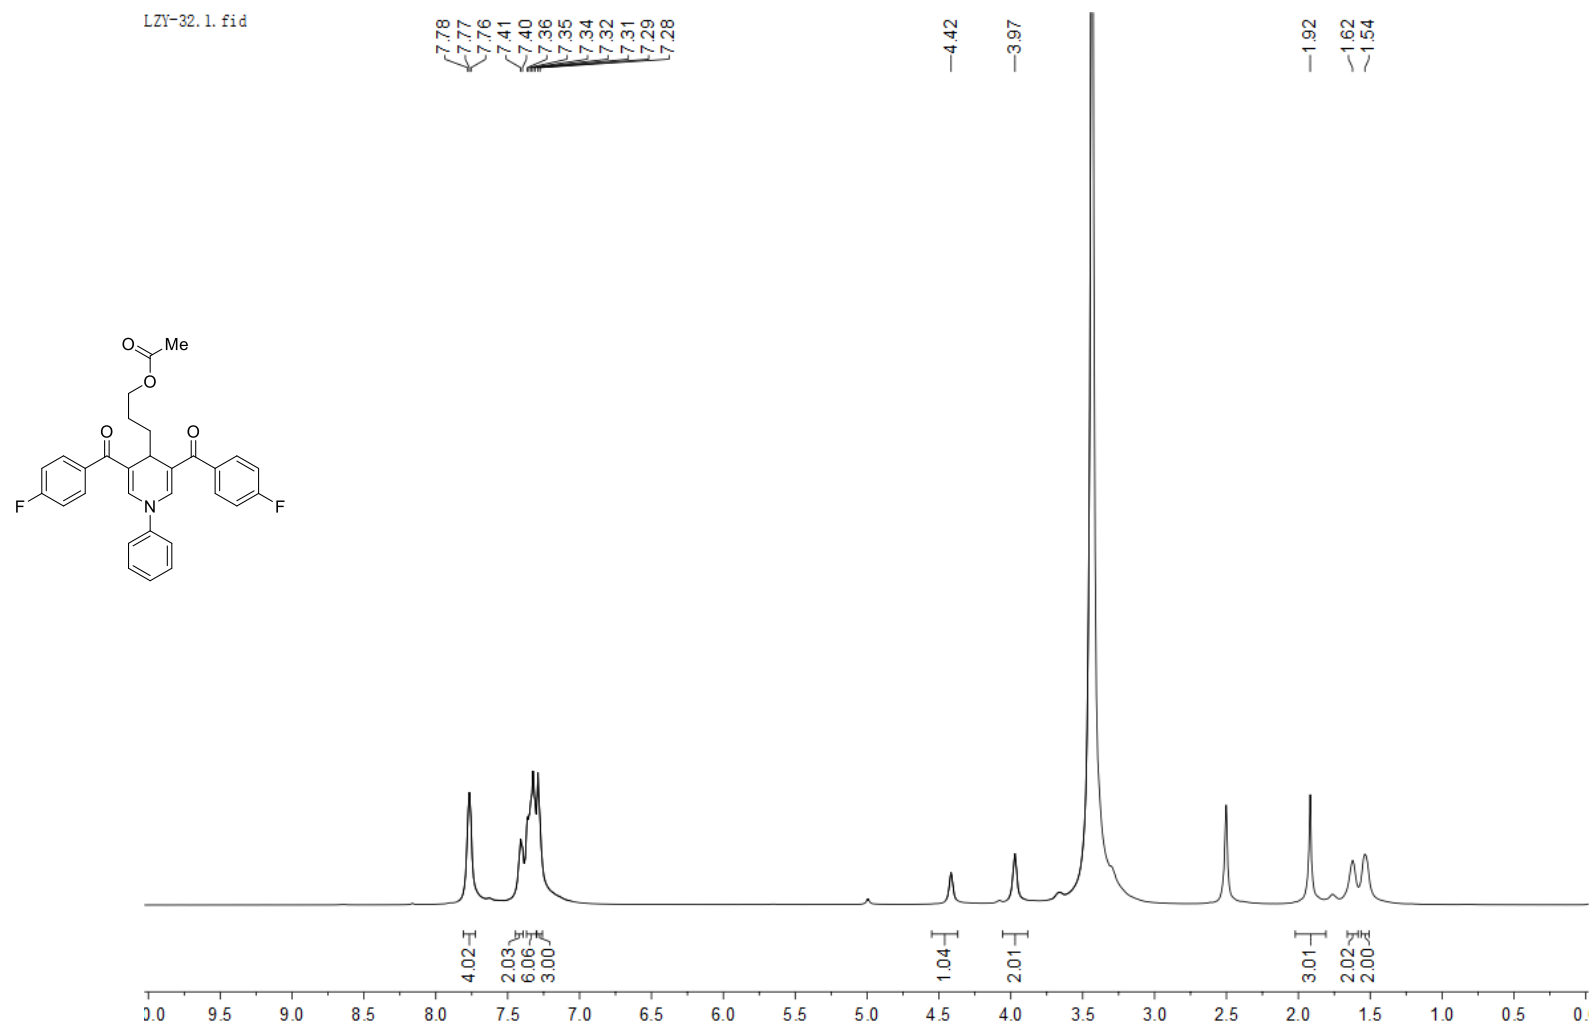

Figure S9.  $^1\text{H}$  NMR (600 MHz,  $\text{DMSO-}d_6$ ) spectra of compound **4e**

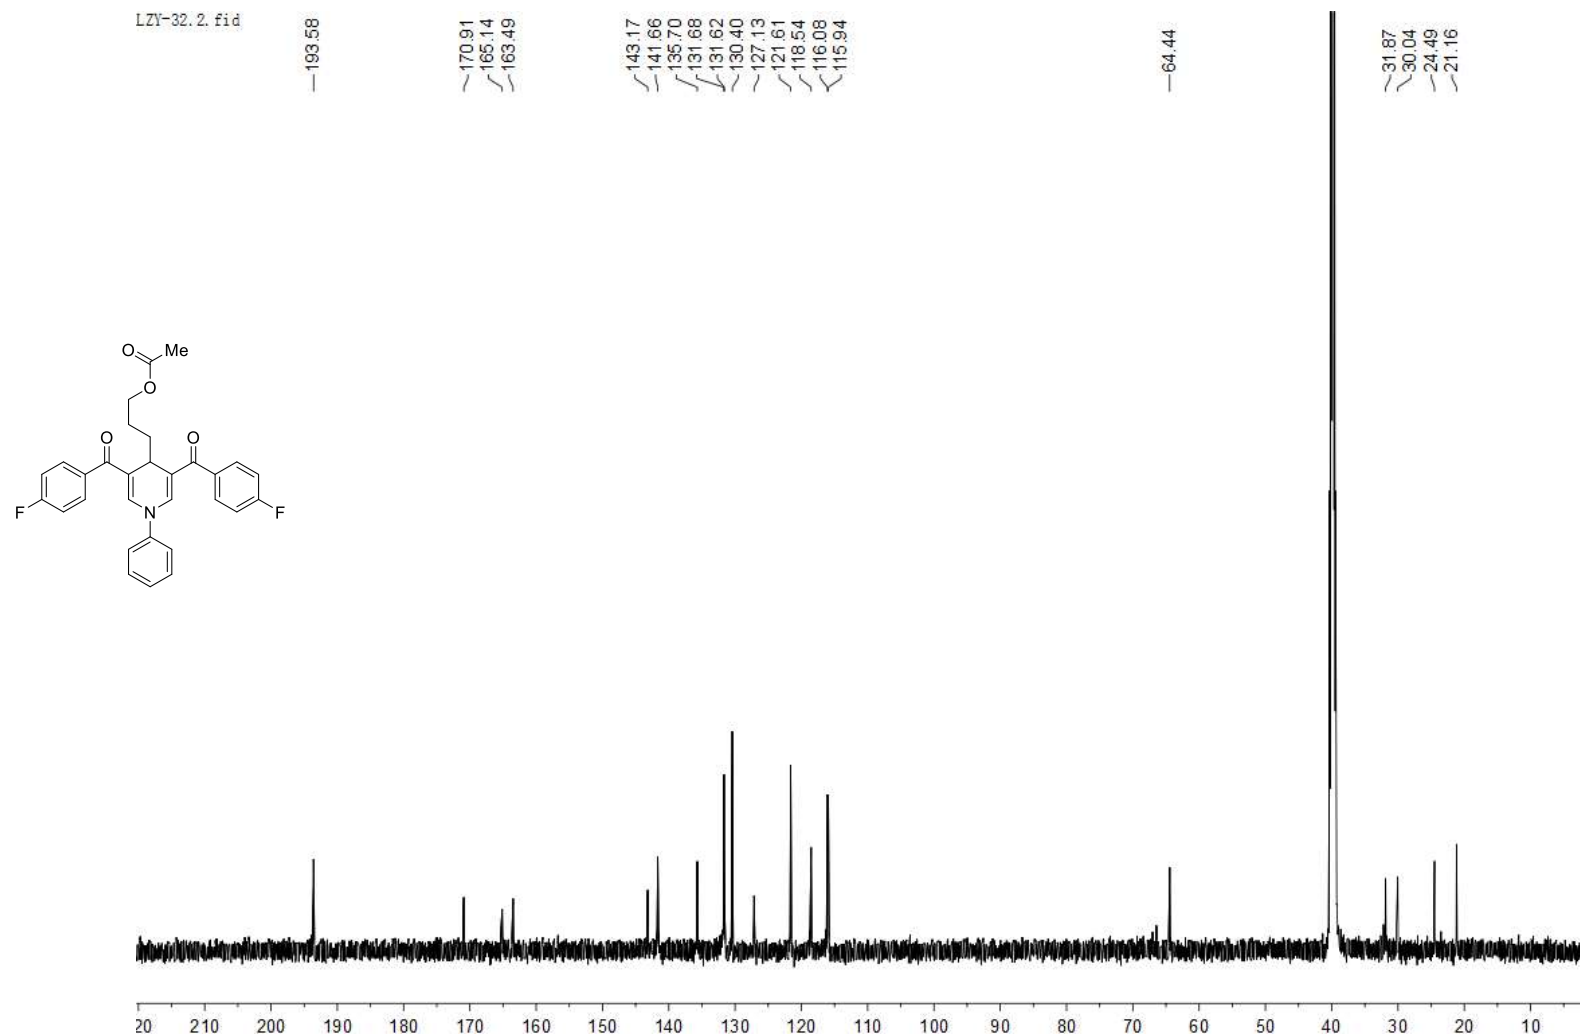

Figure S10.  $^{13}\text{C}$  NMR (150 MHz,  $\text{DMSO-}d_6$ ) spectra of compound **4e**

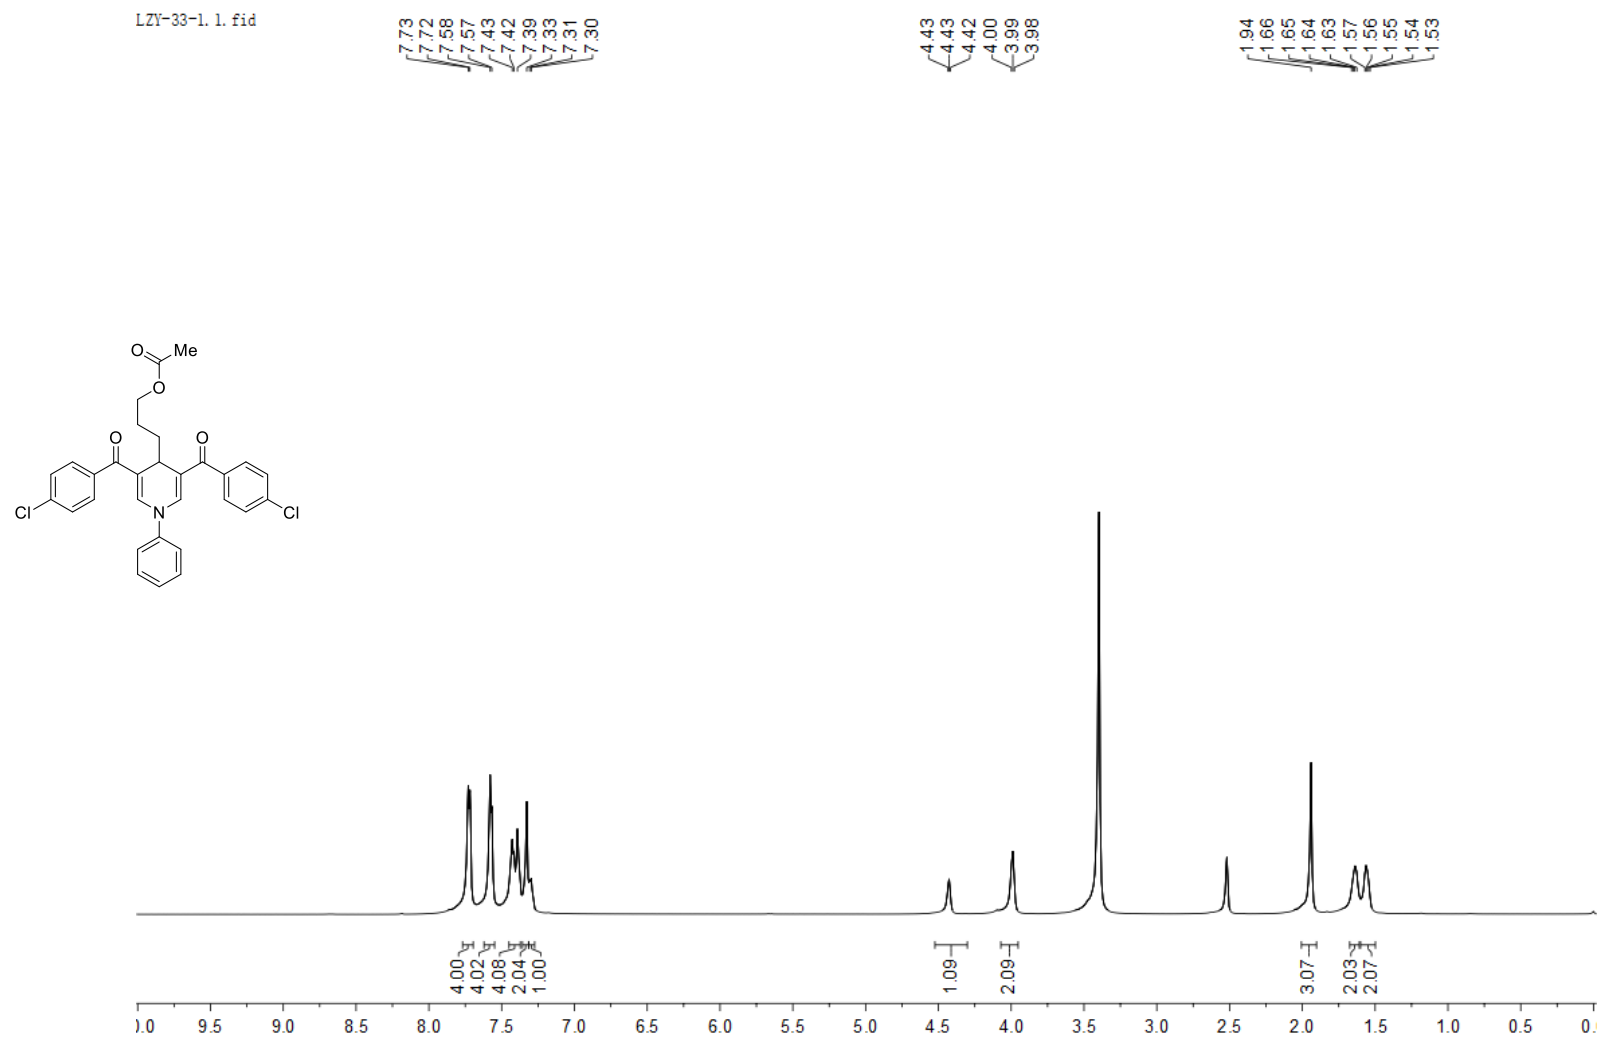

**Figure S11.** <sup>1</sup>H NMR (600 MHz, DMSO-*d*<sub>6</sub>) spectra of compound **4f**

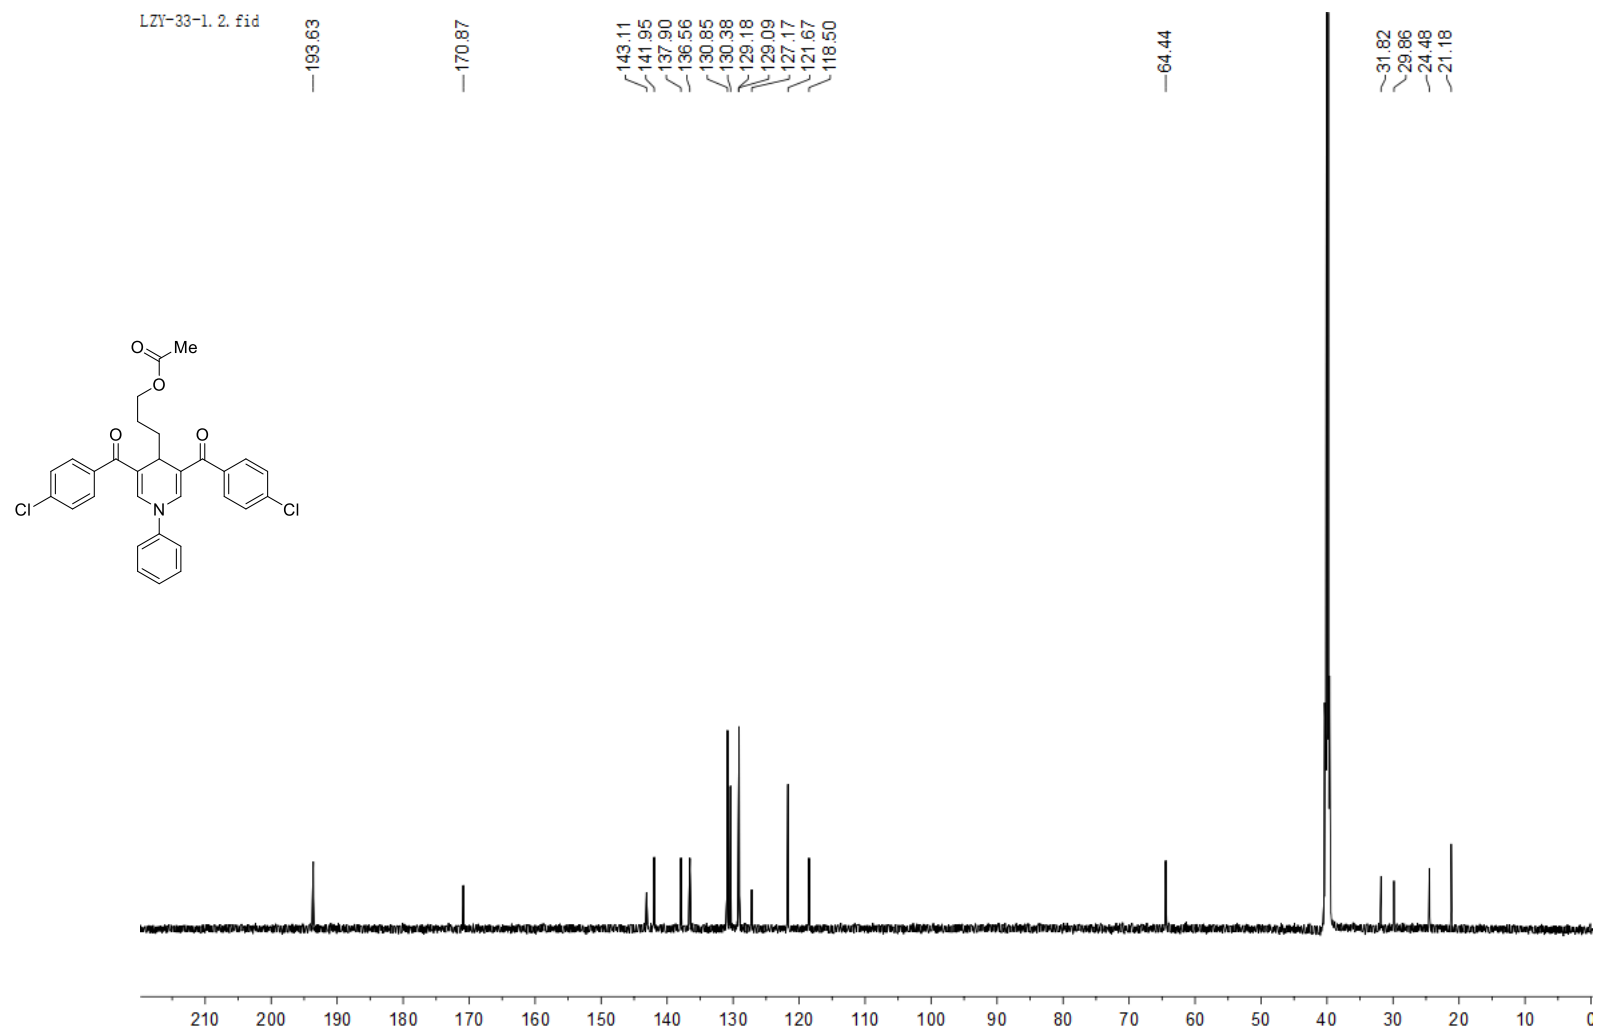

Figure S12.  $^{13}\text{C}$  NMR (150 MHz,  $\text{DMSO-}d_6$ ) spectra of compound **4f**

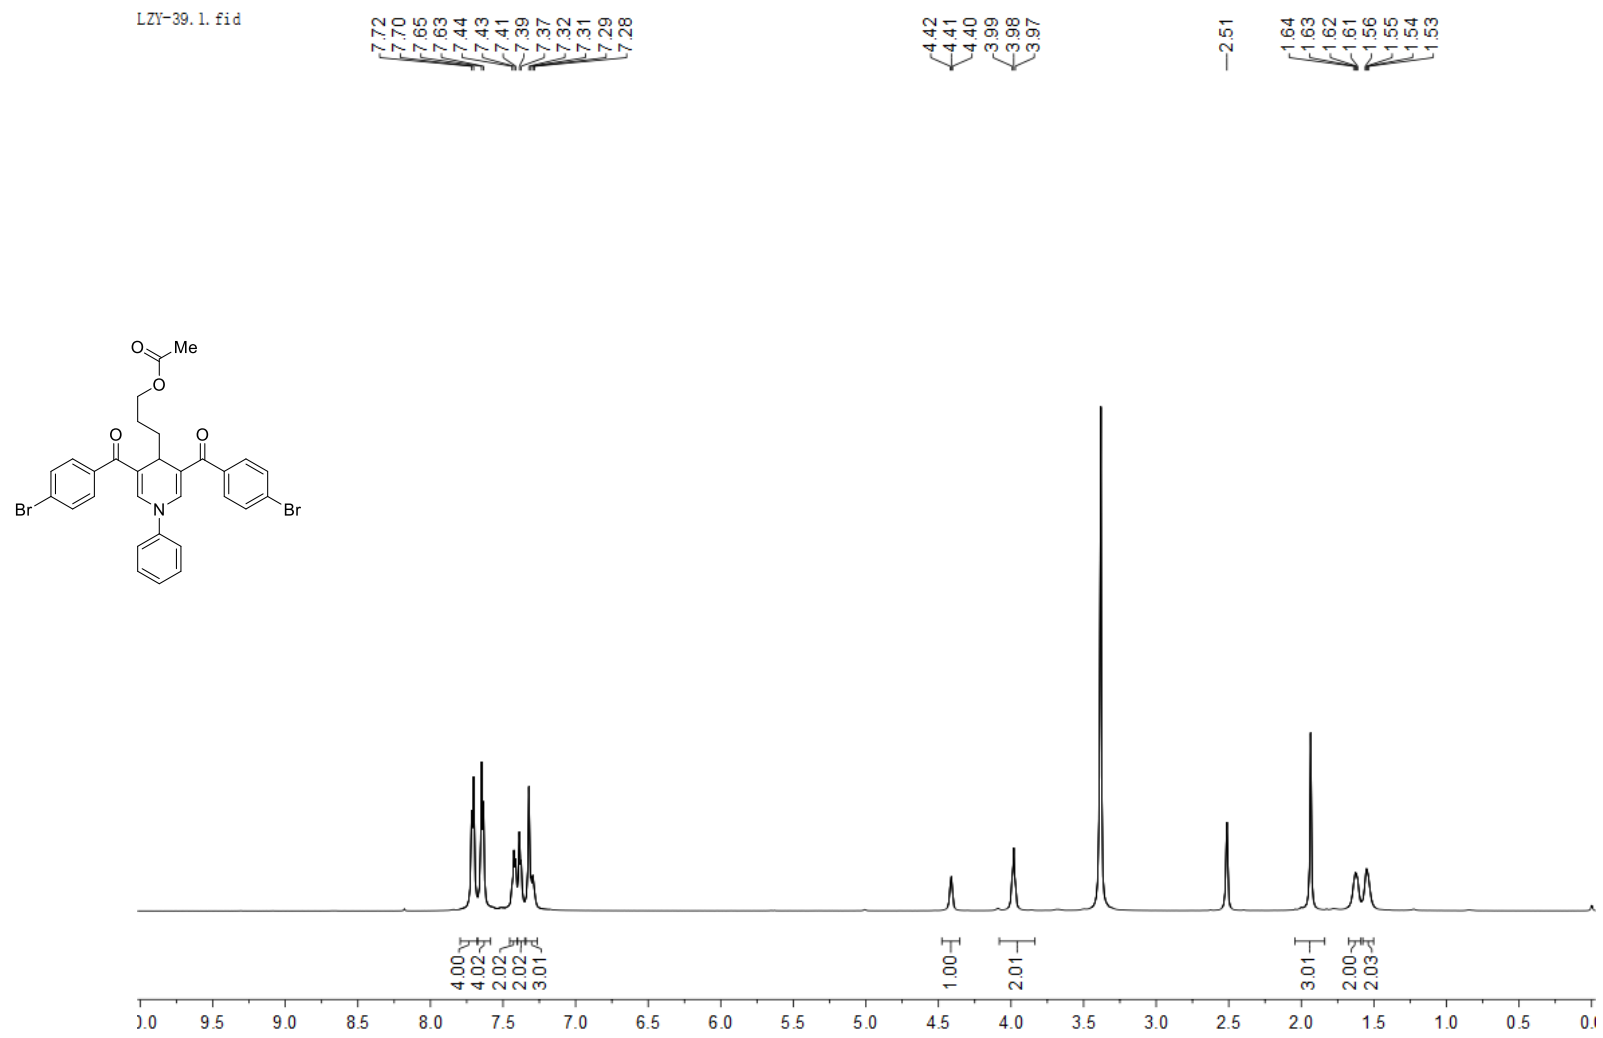

**Figure S13.**  $^1\text{H}$  NMR (600 MHz,  $\text{DMSO-}d_6$ ) spectra of compound **4g**

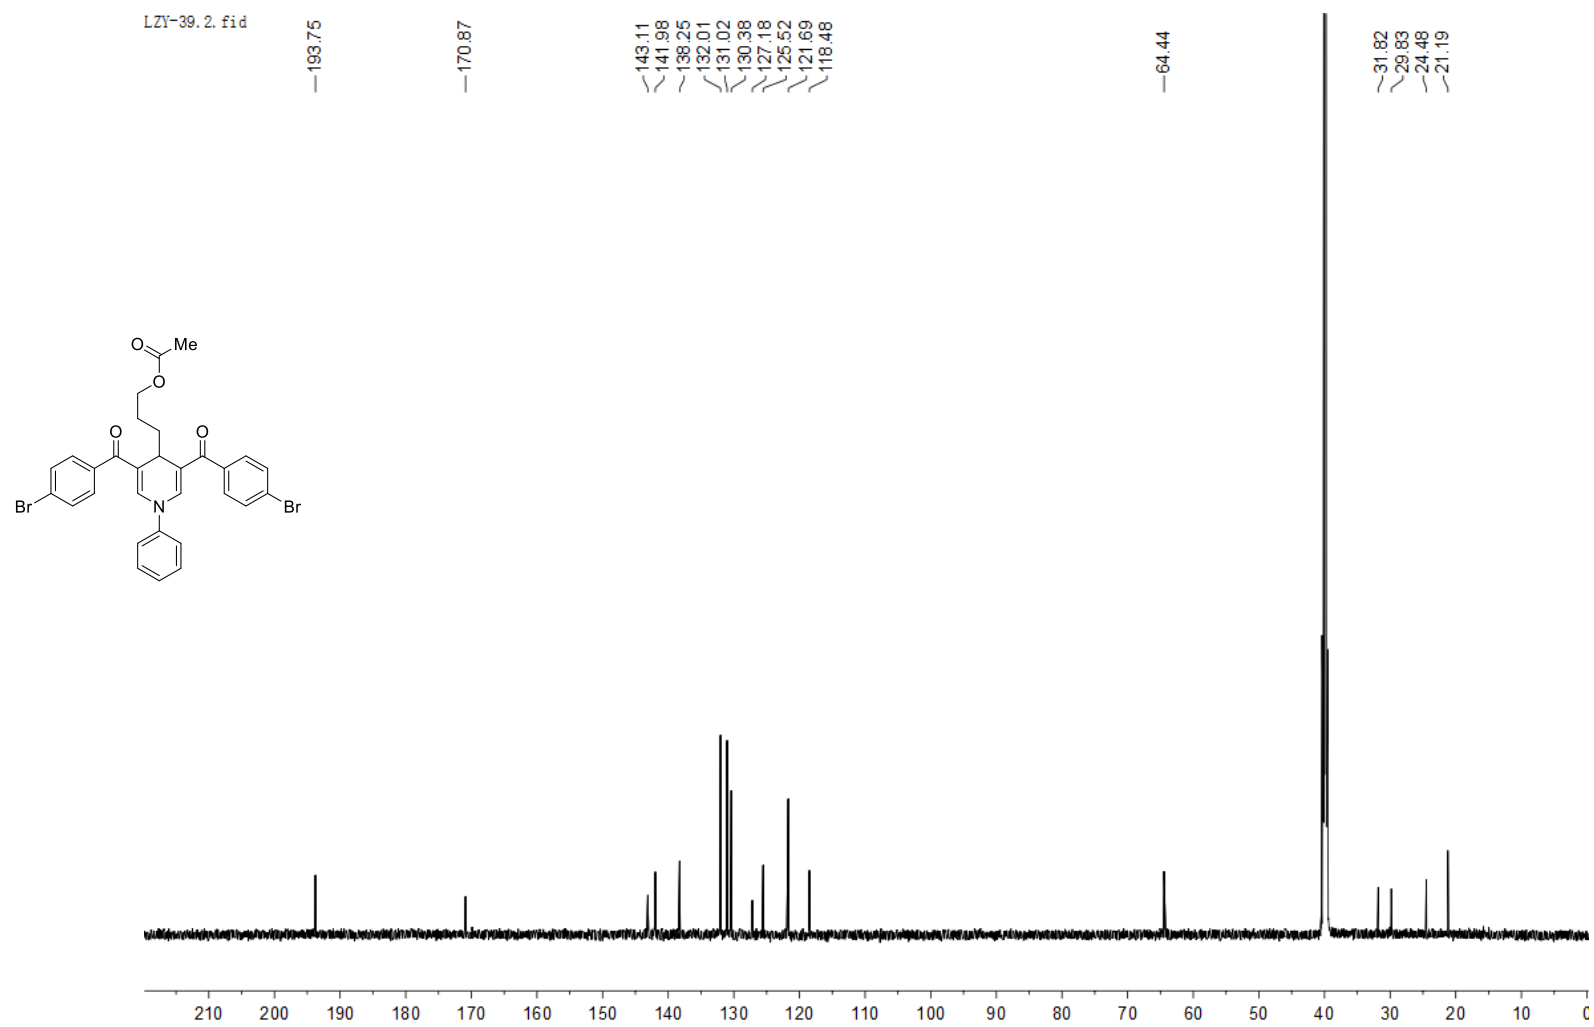

Figure S14.  $^{13}\text{C}$  NMR (150 MHz,  $\text{DMSO-}d_6$ ) spectra of compound **4g**

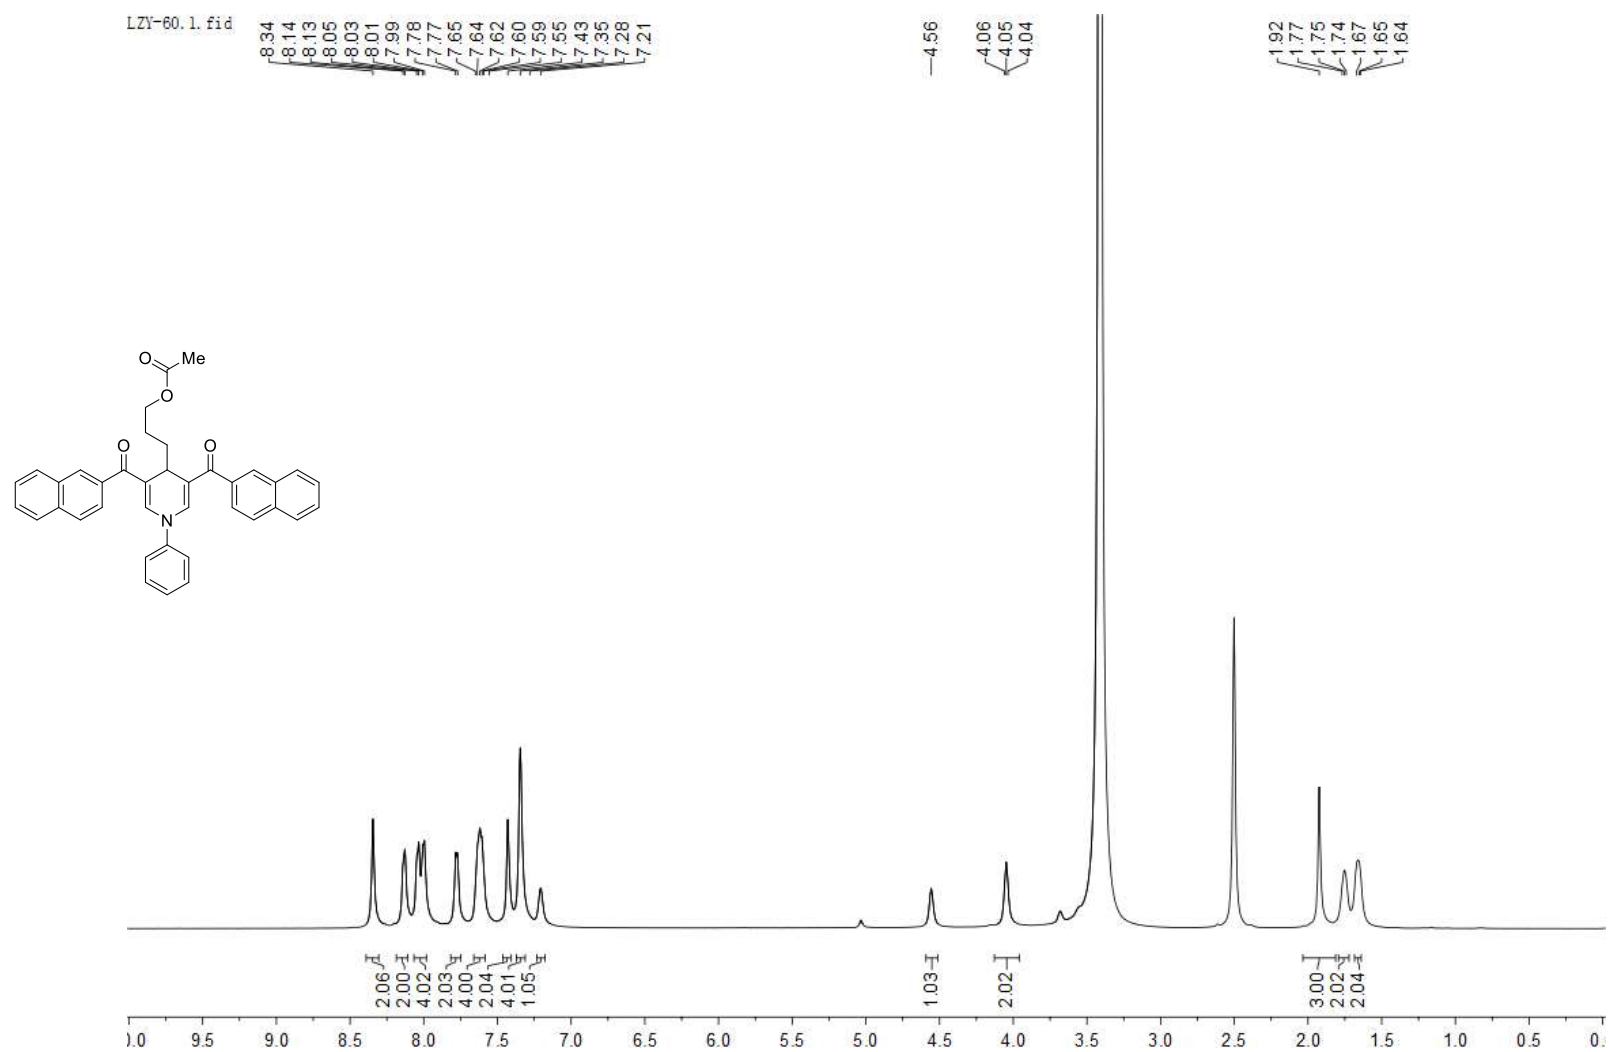

**Figure S15.**  $^1\text{H}$  NMR (600 MHz,  $\text{DMSO-}d_6$ ) spectra of compound **4h**

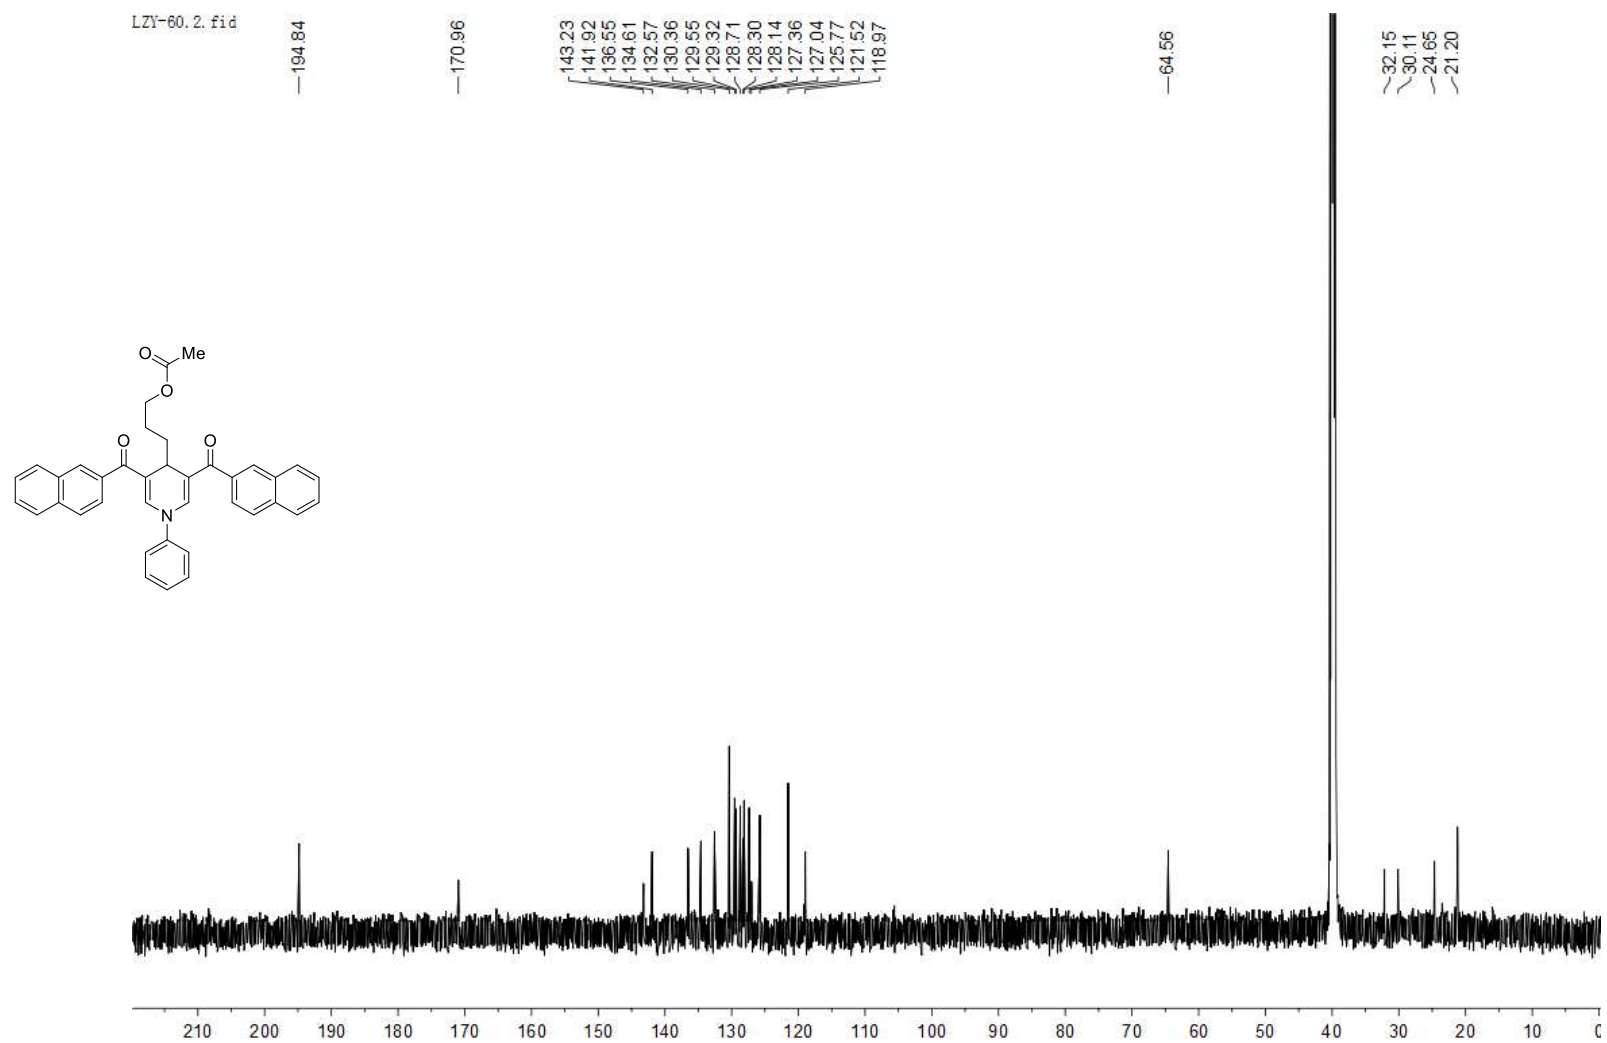

Figure S16.  $^{13}\text{C}$  NMR (150 MHz,  $\text{DMSO-}d_6$ ) spectra of compound **4h**



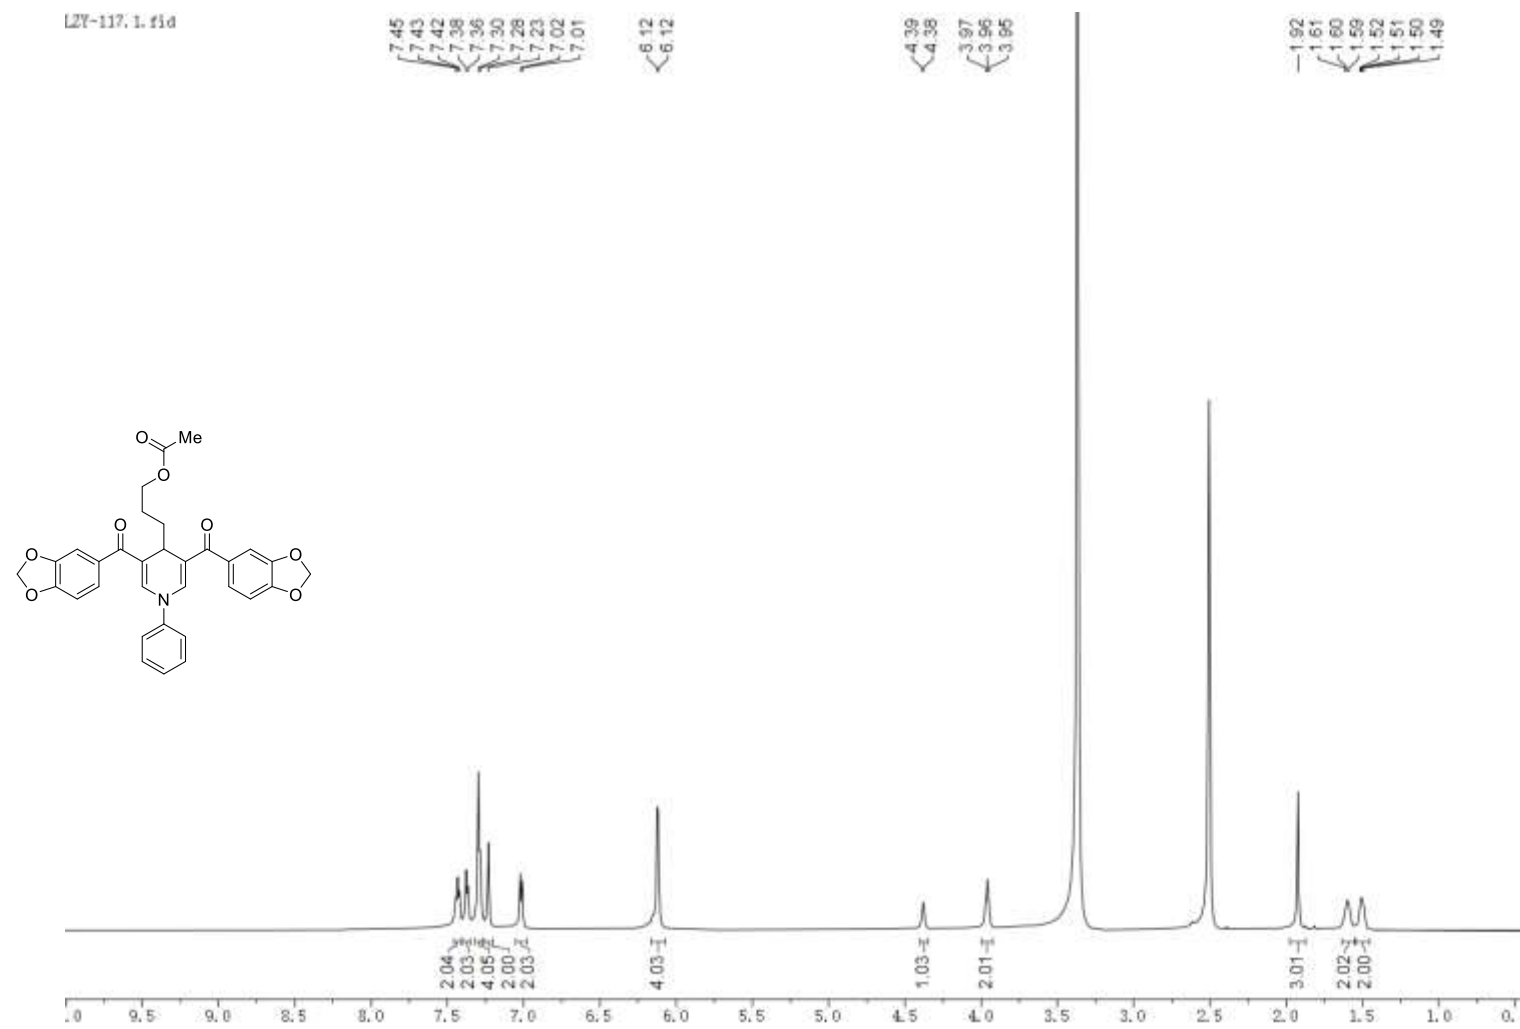

**Figure S17.**  $^1\text{H NMR}$  (600 MHz,  $\text{DMSO-}d_6$ ) spectra of compound **4i**

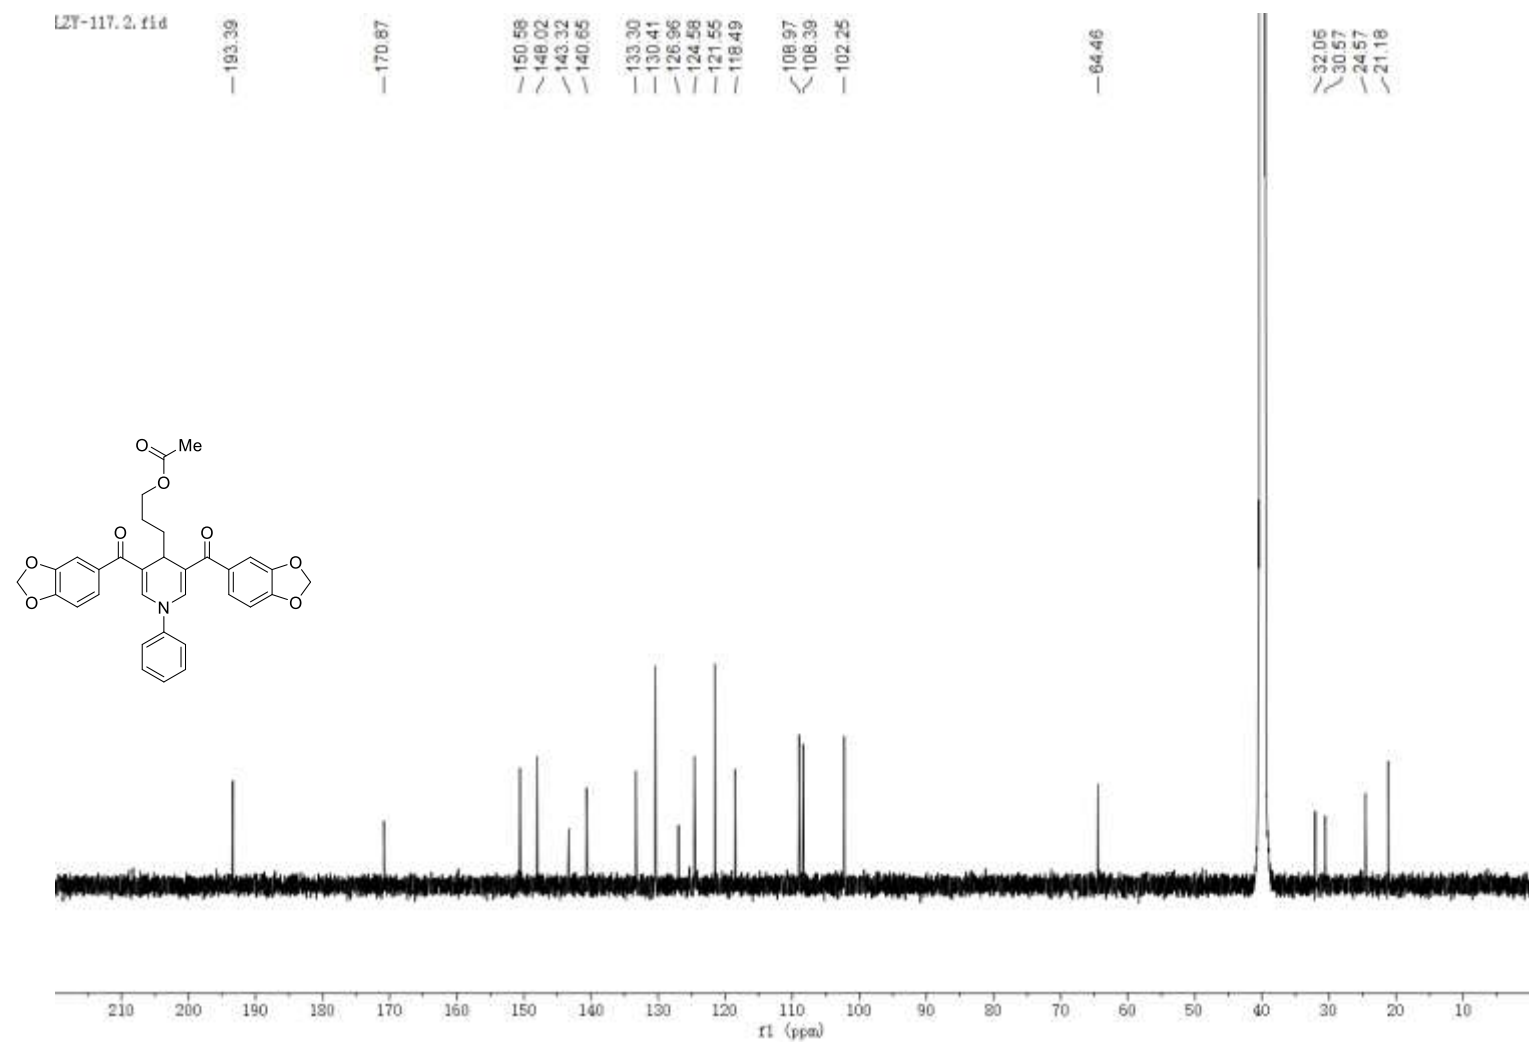

**Figure S18.**  $^{13}\text{C}$  NMR (150 MHz, DMSO- $d_6$ ) spectra of compound **4i**

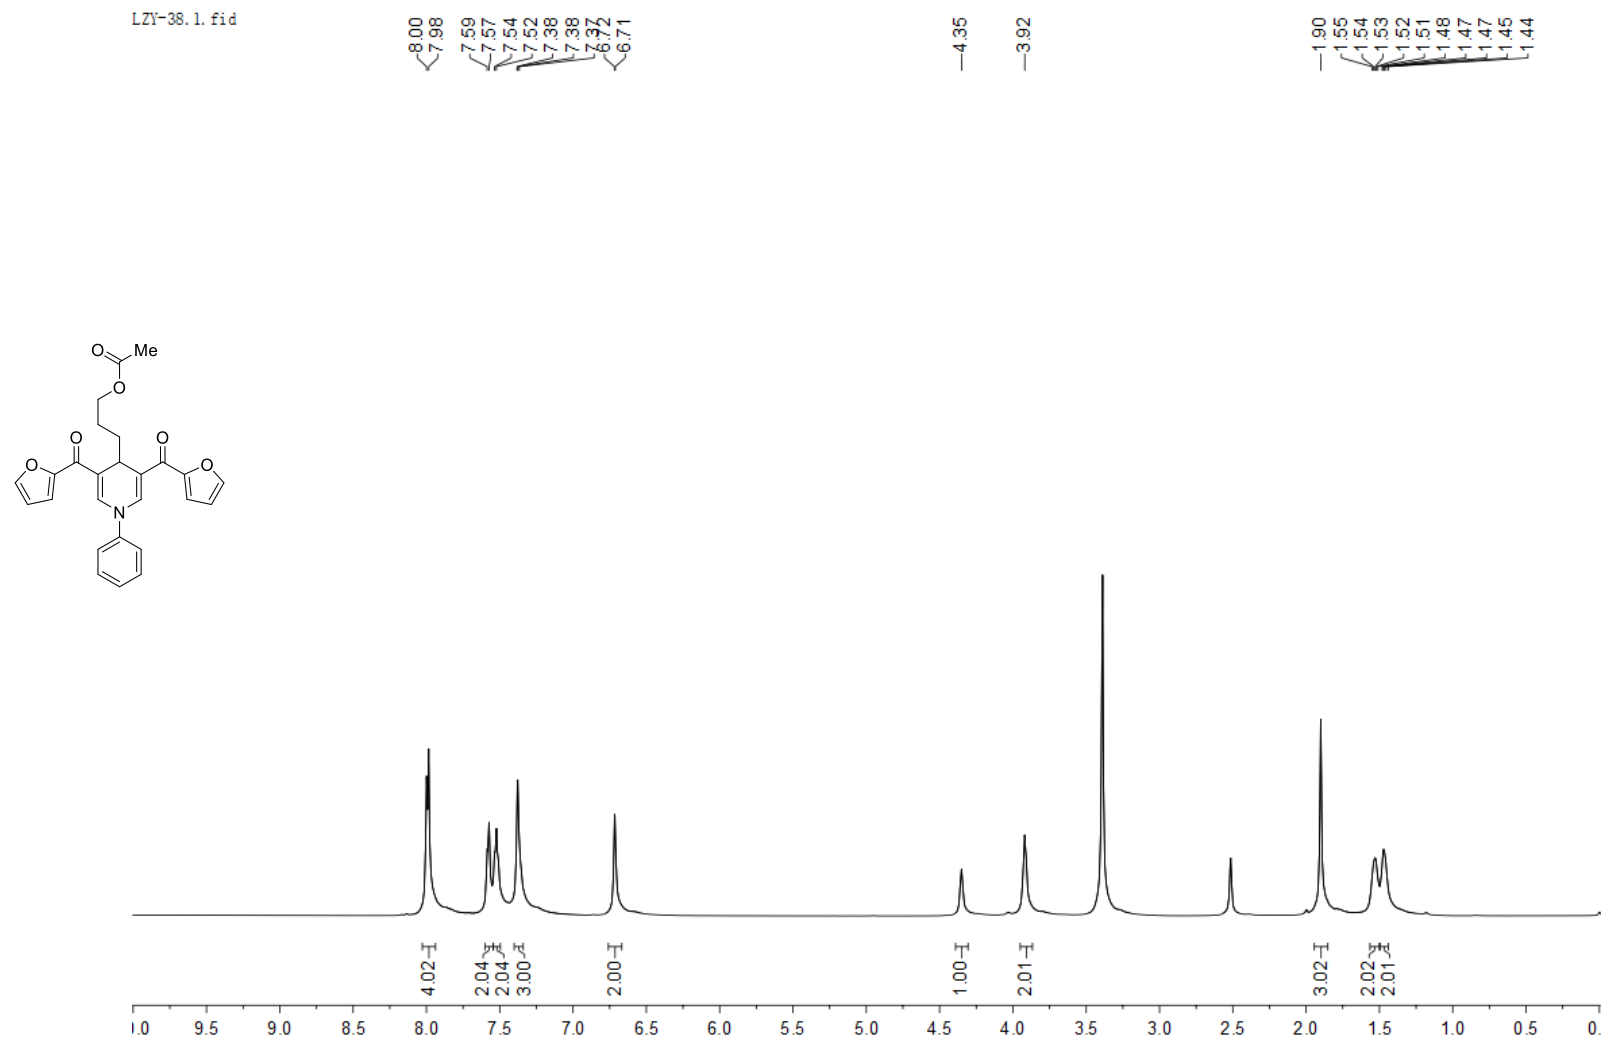

**Figure S19.**  $^1\text{H}$  NMR (600 MHz,  $\text{DMSO-}d_6$ ) spectra of compound **4j**

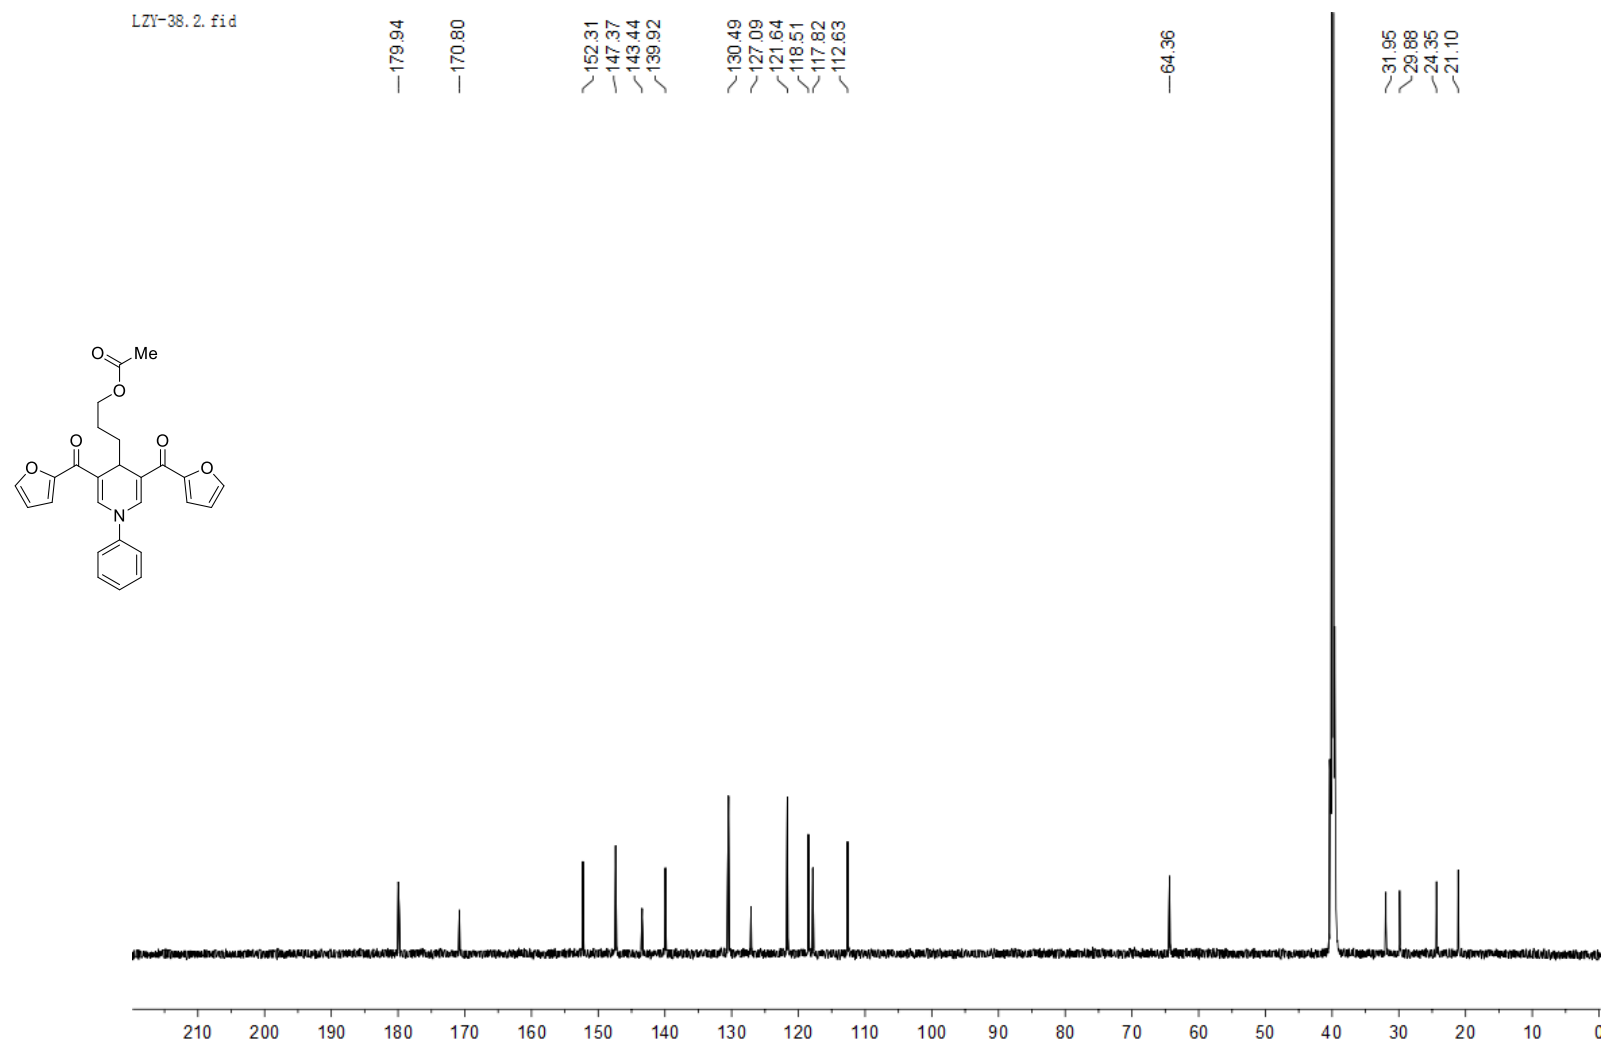

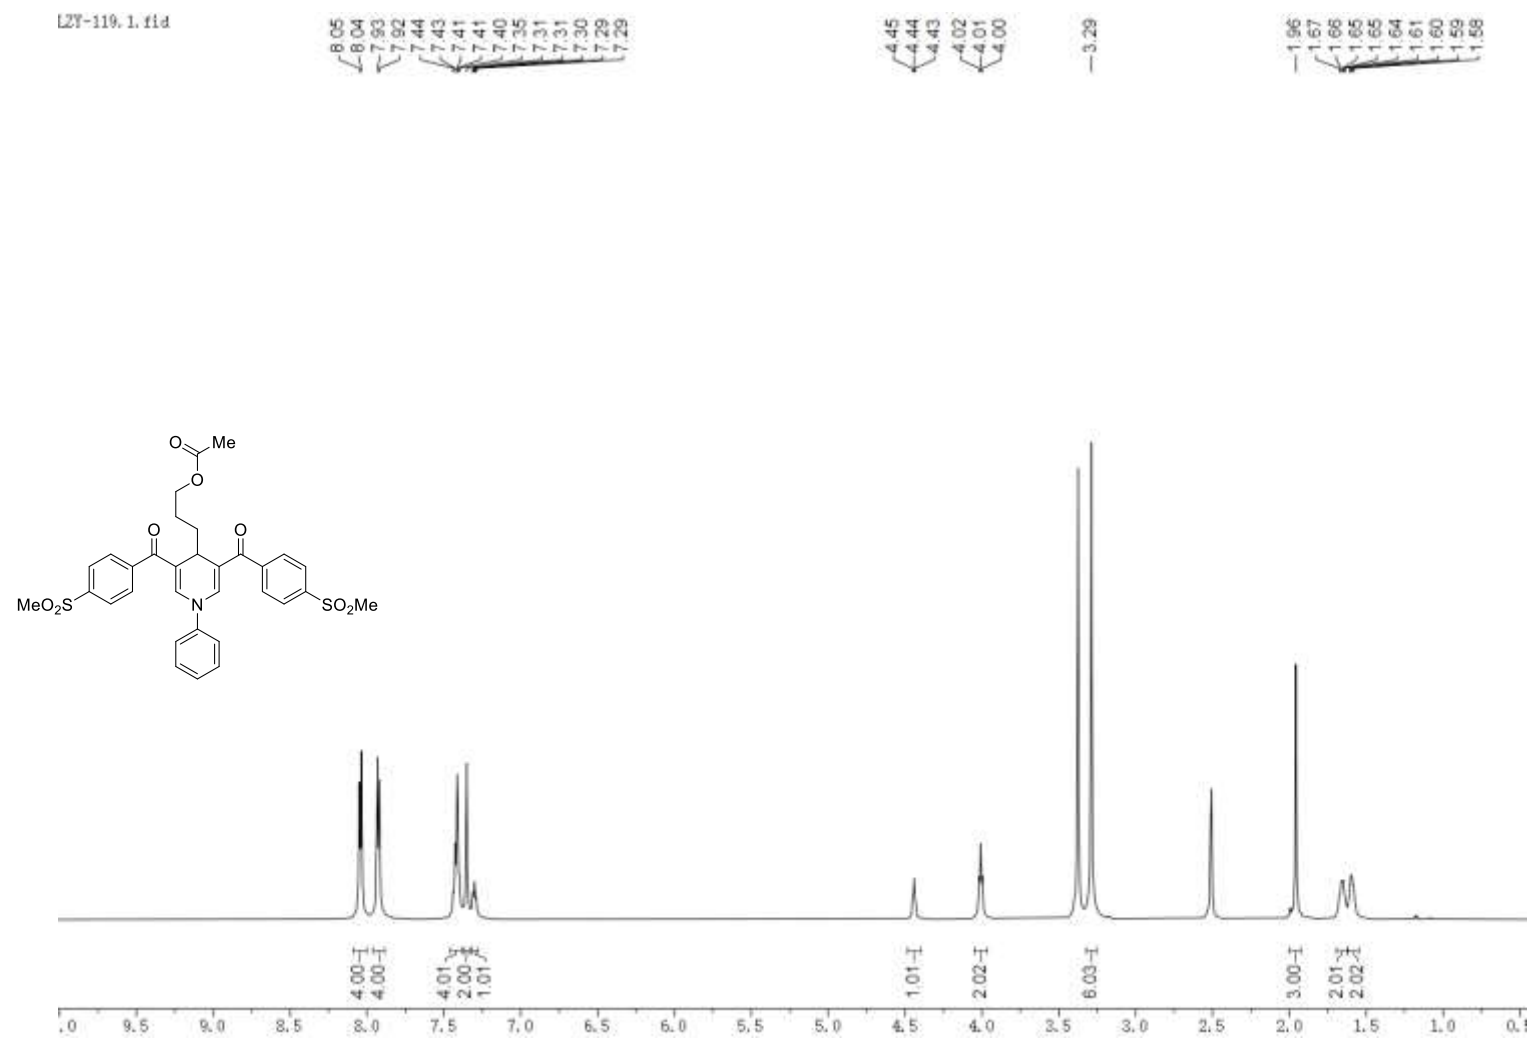

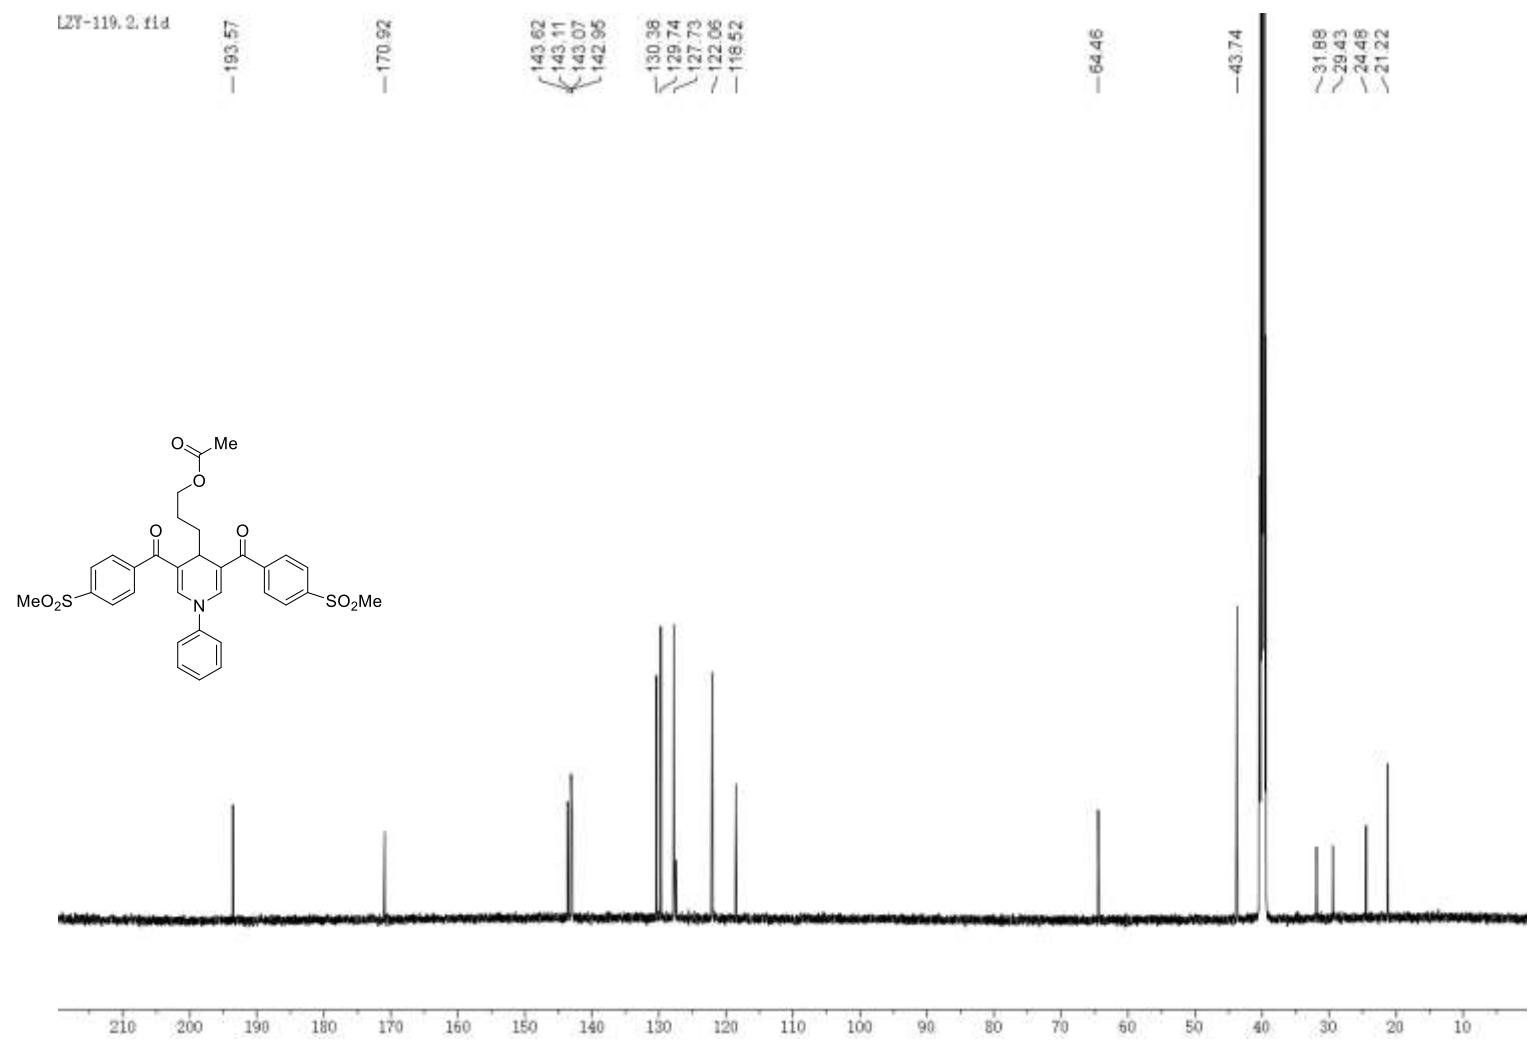

**Figure S22.**  $^{13}\text{C}$  NMR (150 MHz,  $\text{DMSO-}d_6$ ) spectra of compound **4k**

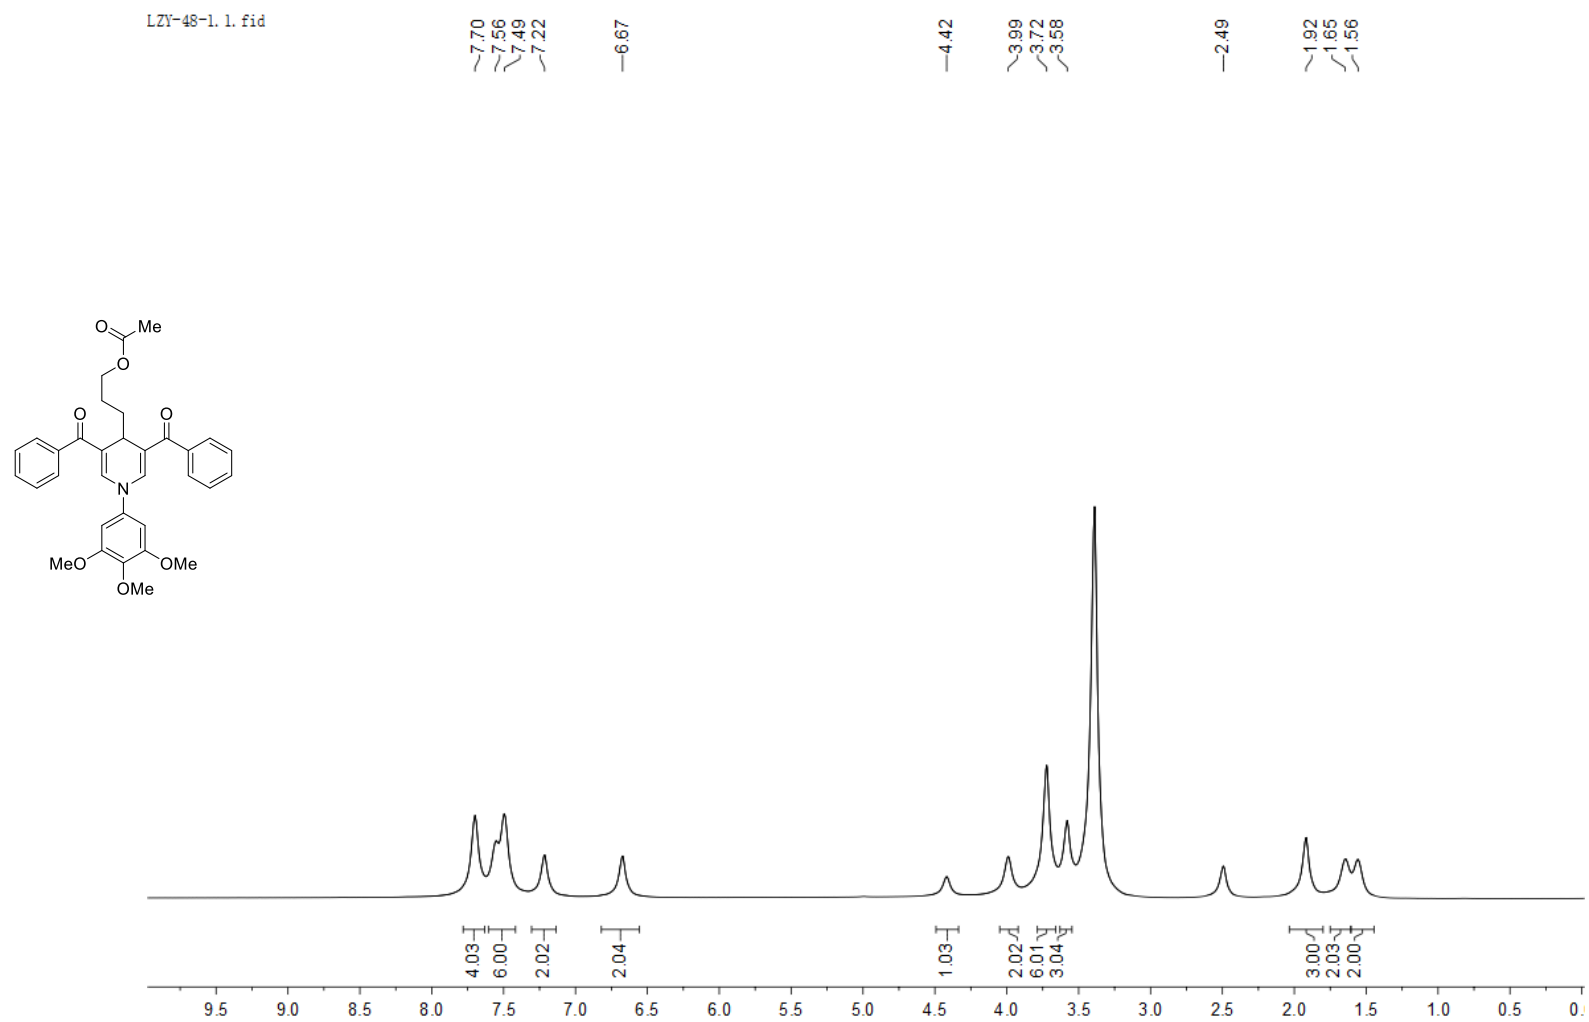

**Figure S23.**  $^1\text{H}$  NMR (600 MHz,  $\text{DMSO-}d_6$ ) spectra of compound **4I**

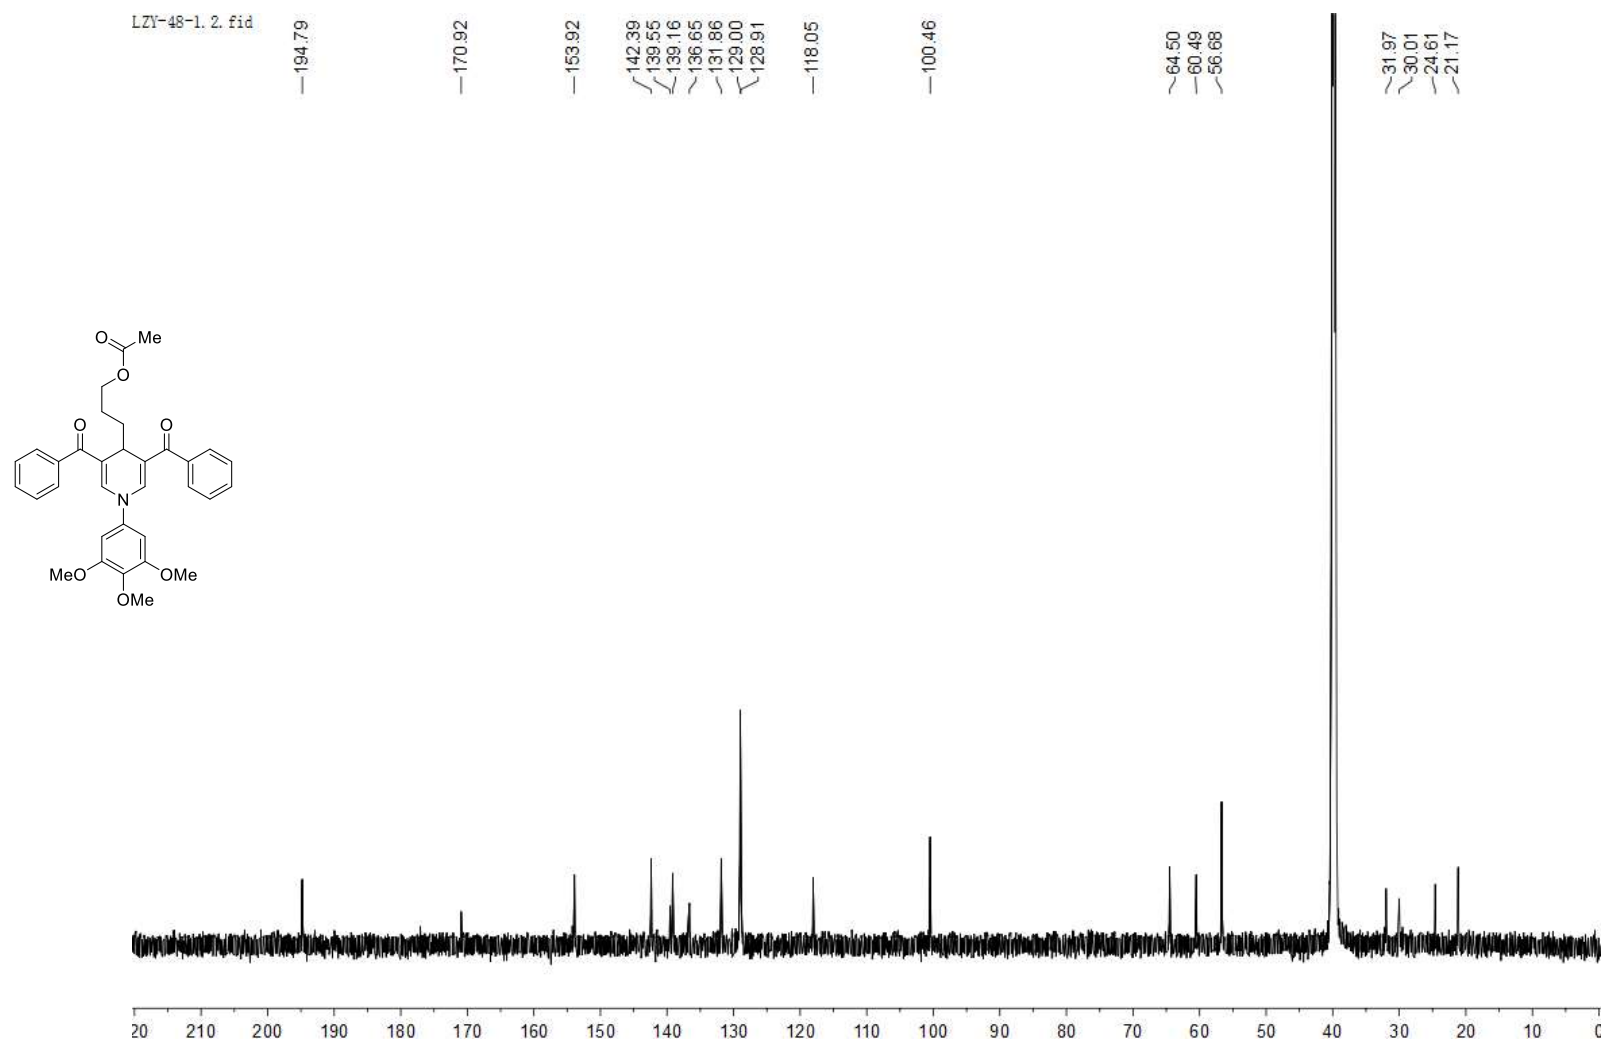



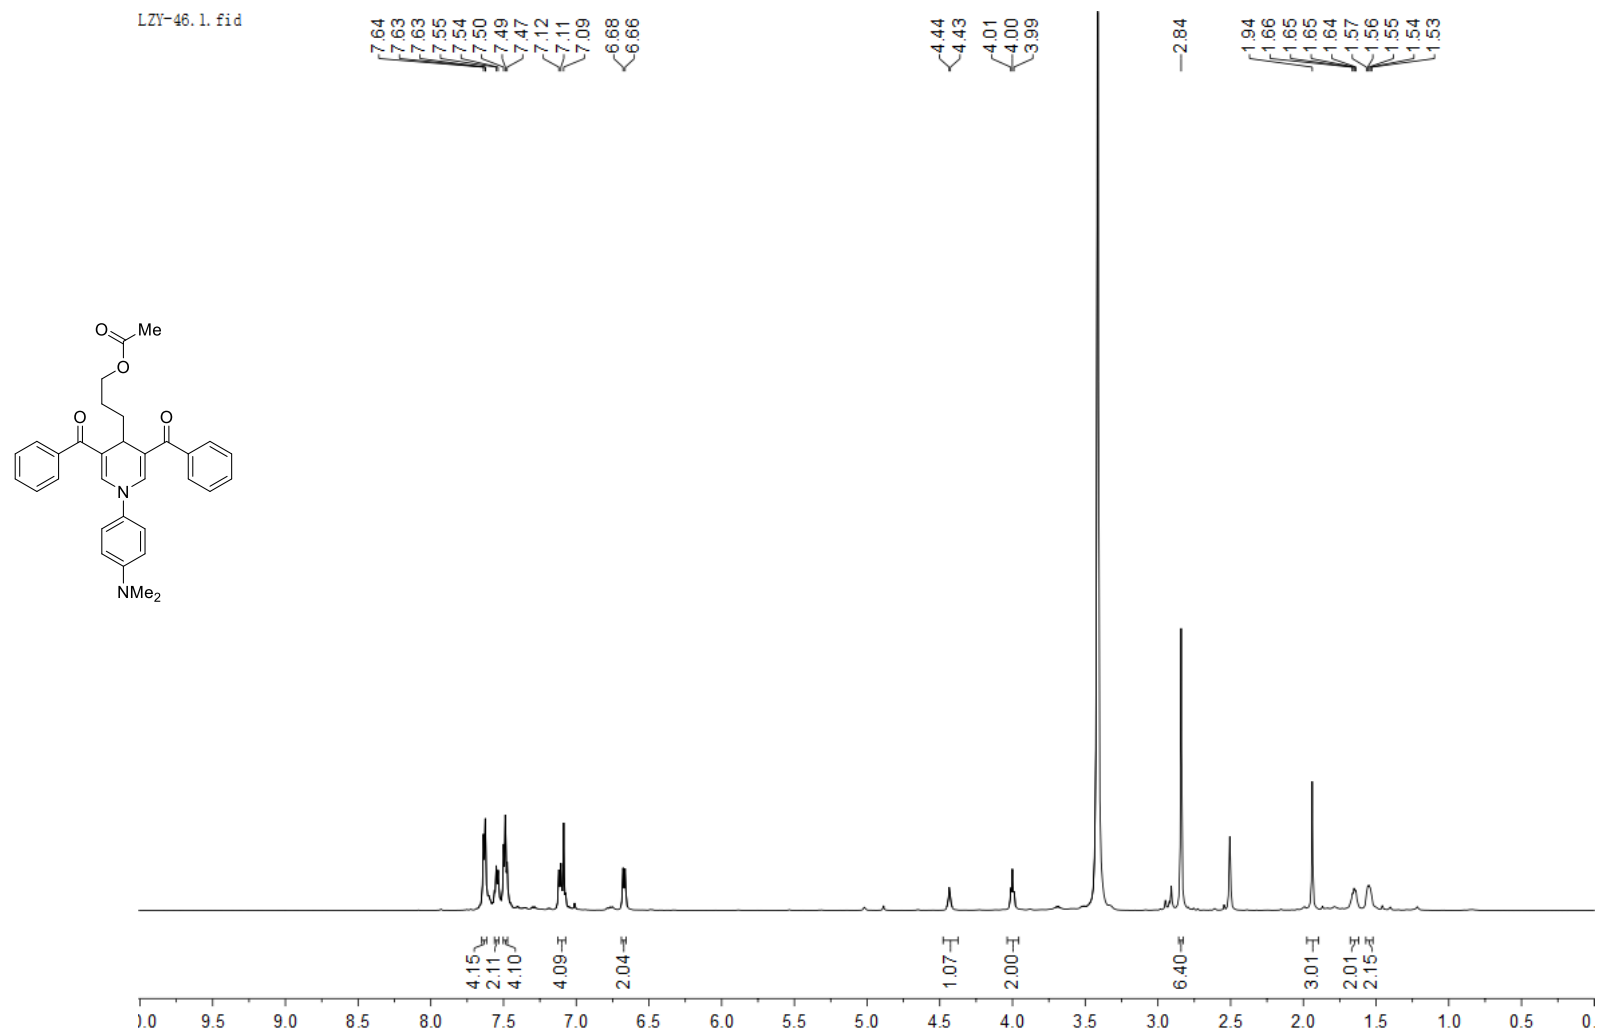

Figure S25.  $^1\text{H}$  NMR (600 MHz,  $\text{DMSO-}d_6$ ) spectra of compound **4m**

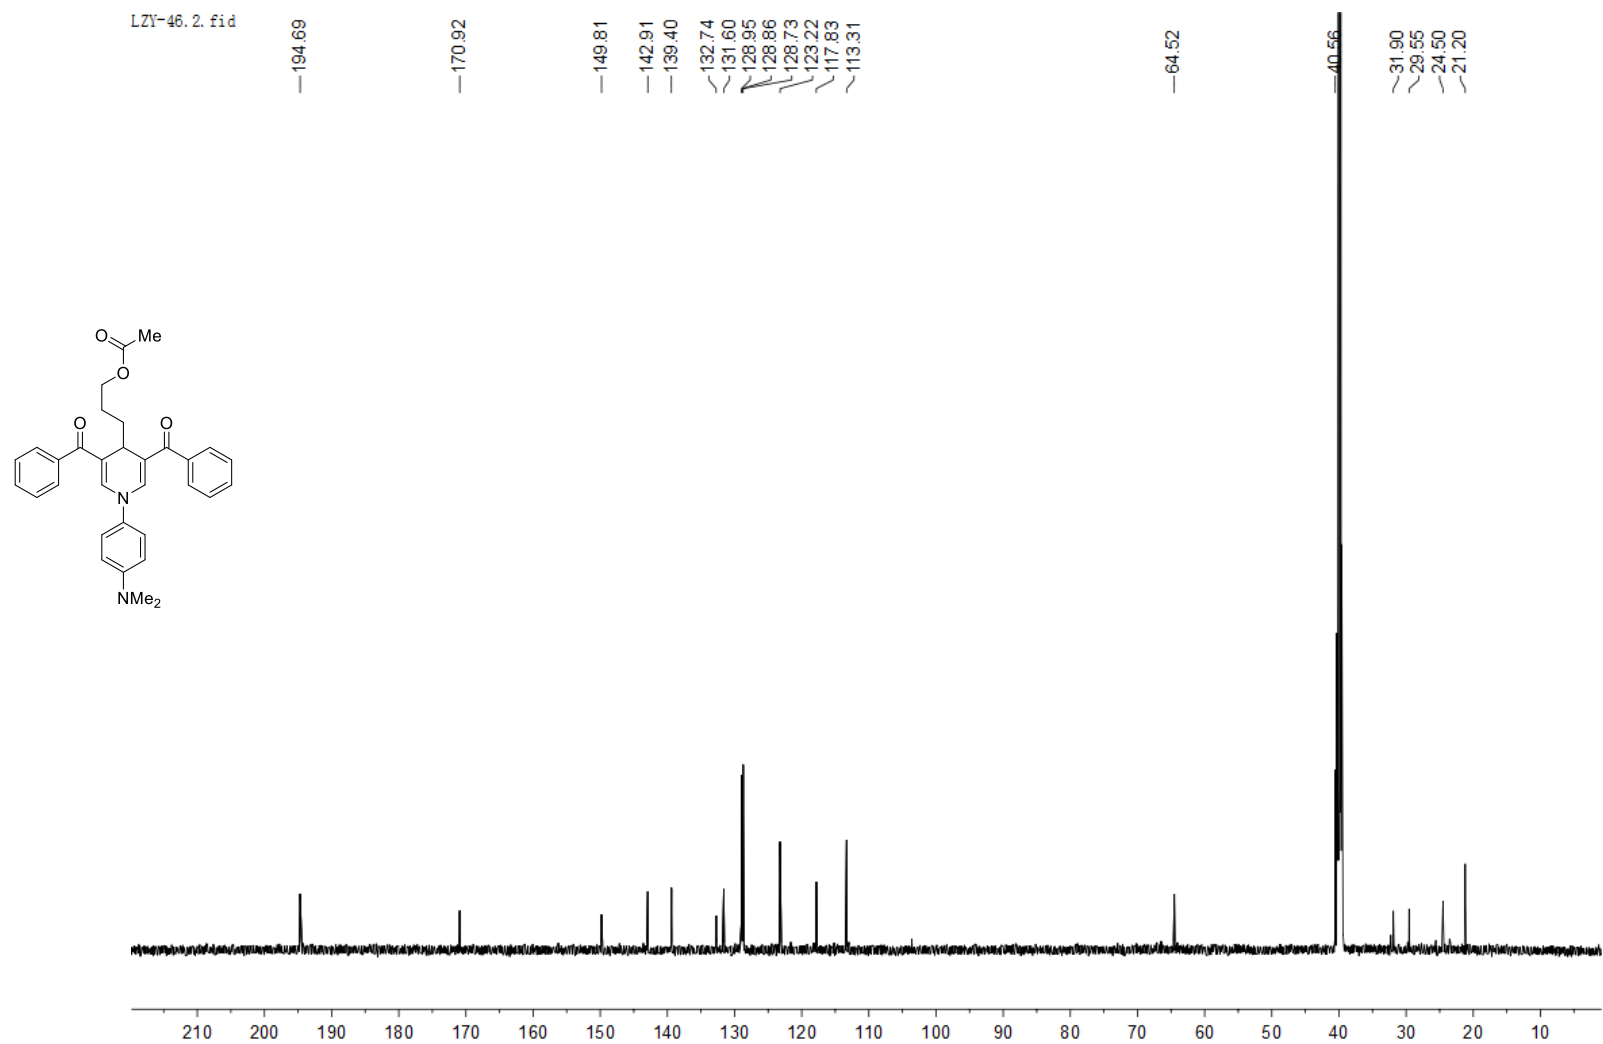

Figure S26.  $^{13}\text{C}$  NMR (150 MHz,  $\text{DMSO-}d_6$ ) spectra of compound **4m**

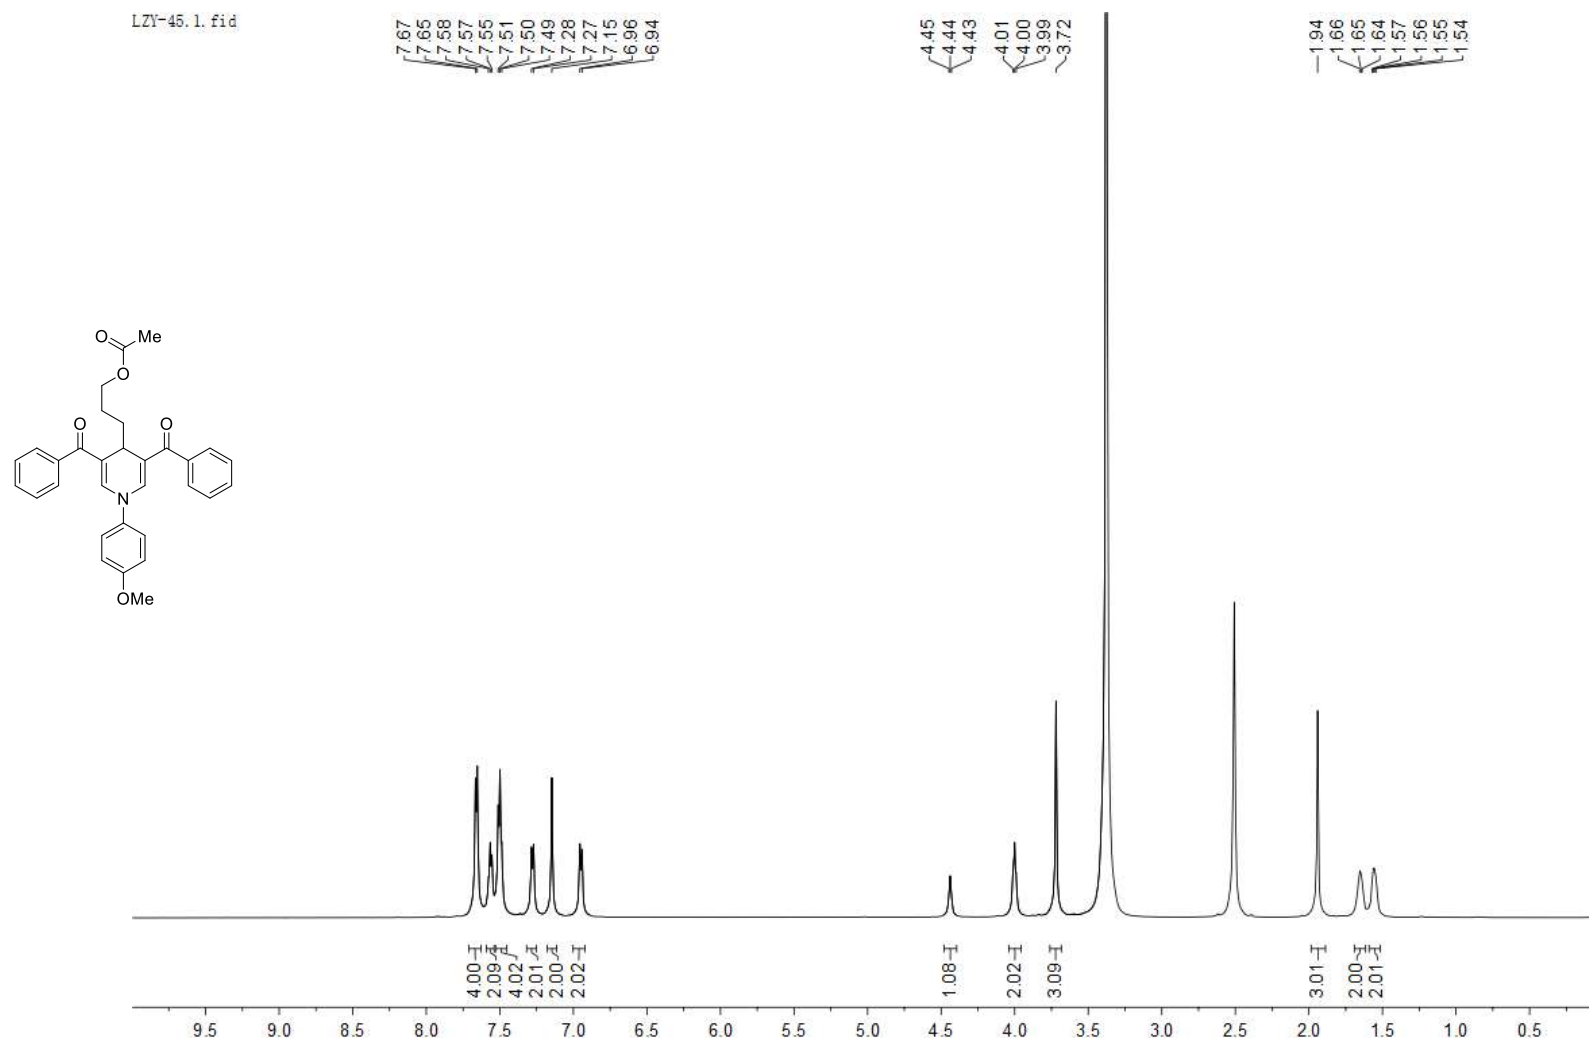

**Figure S27.** <sup>1</sup>H NMR (600 MHz, DMSO-*d*<sub>6</sub>) spectra of compound **4n**

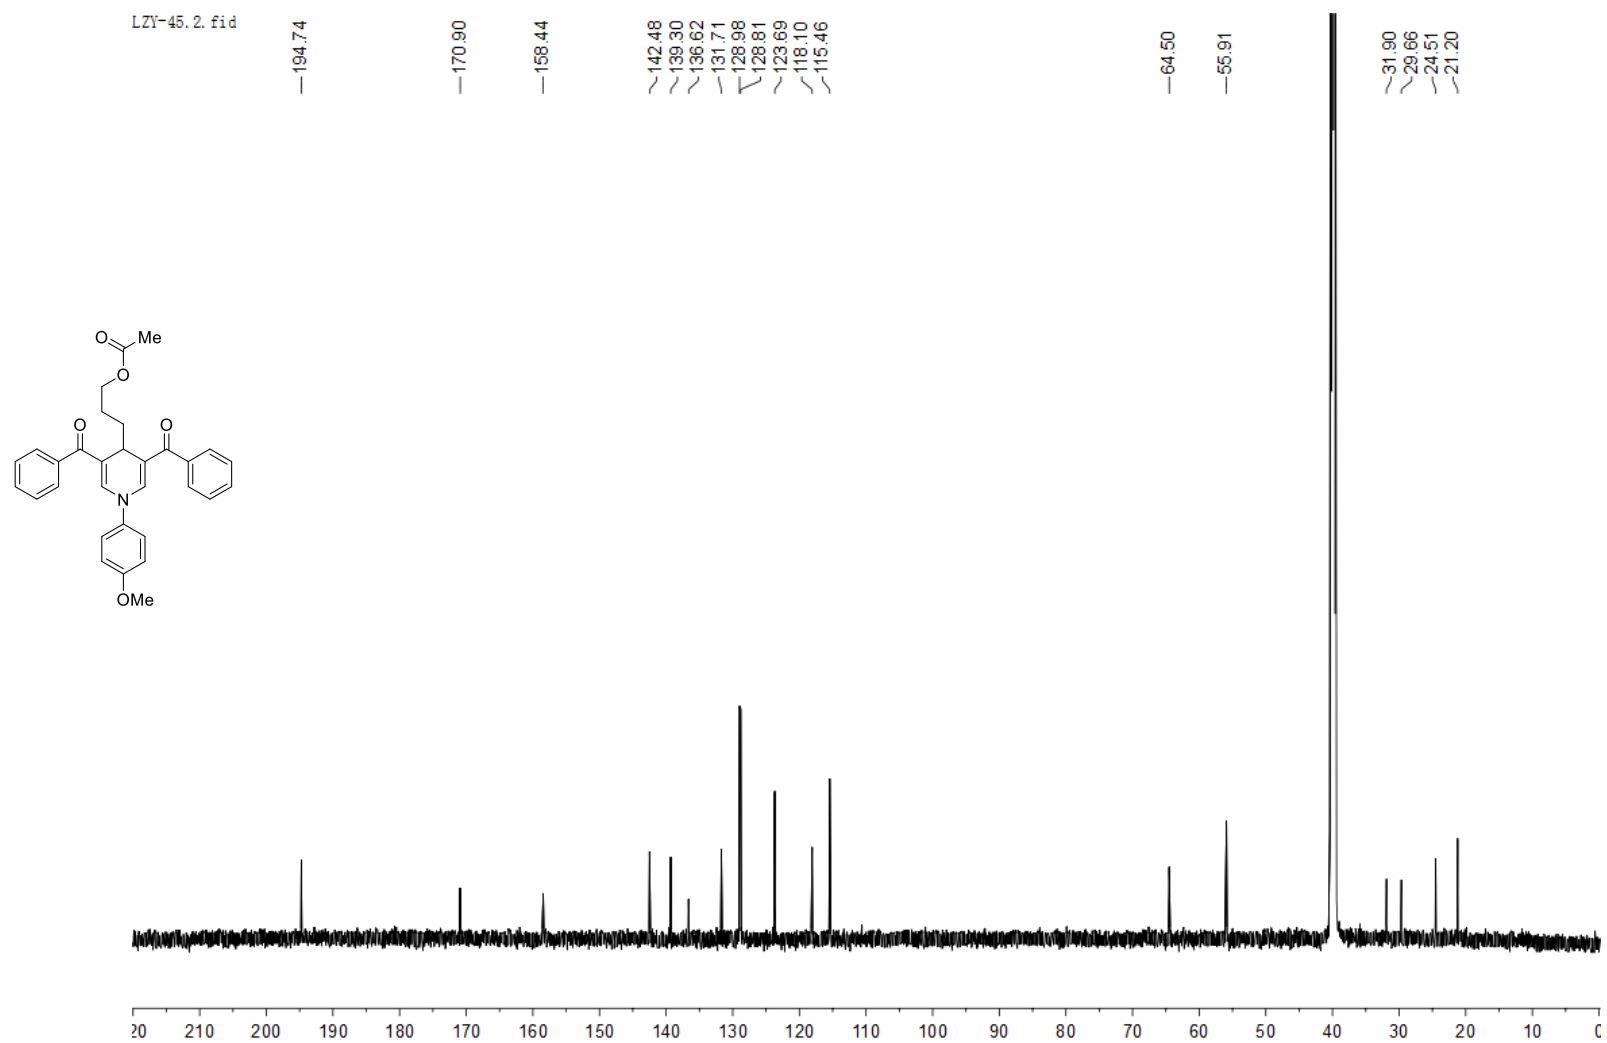

Figure S28.  $^{13}\text{C}$  NMR (150 MHz,  $\text{DMSO-}d_6$ ) spectra of compound **4n**

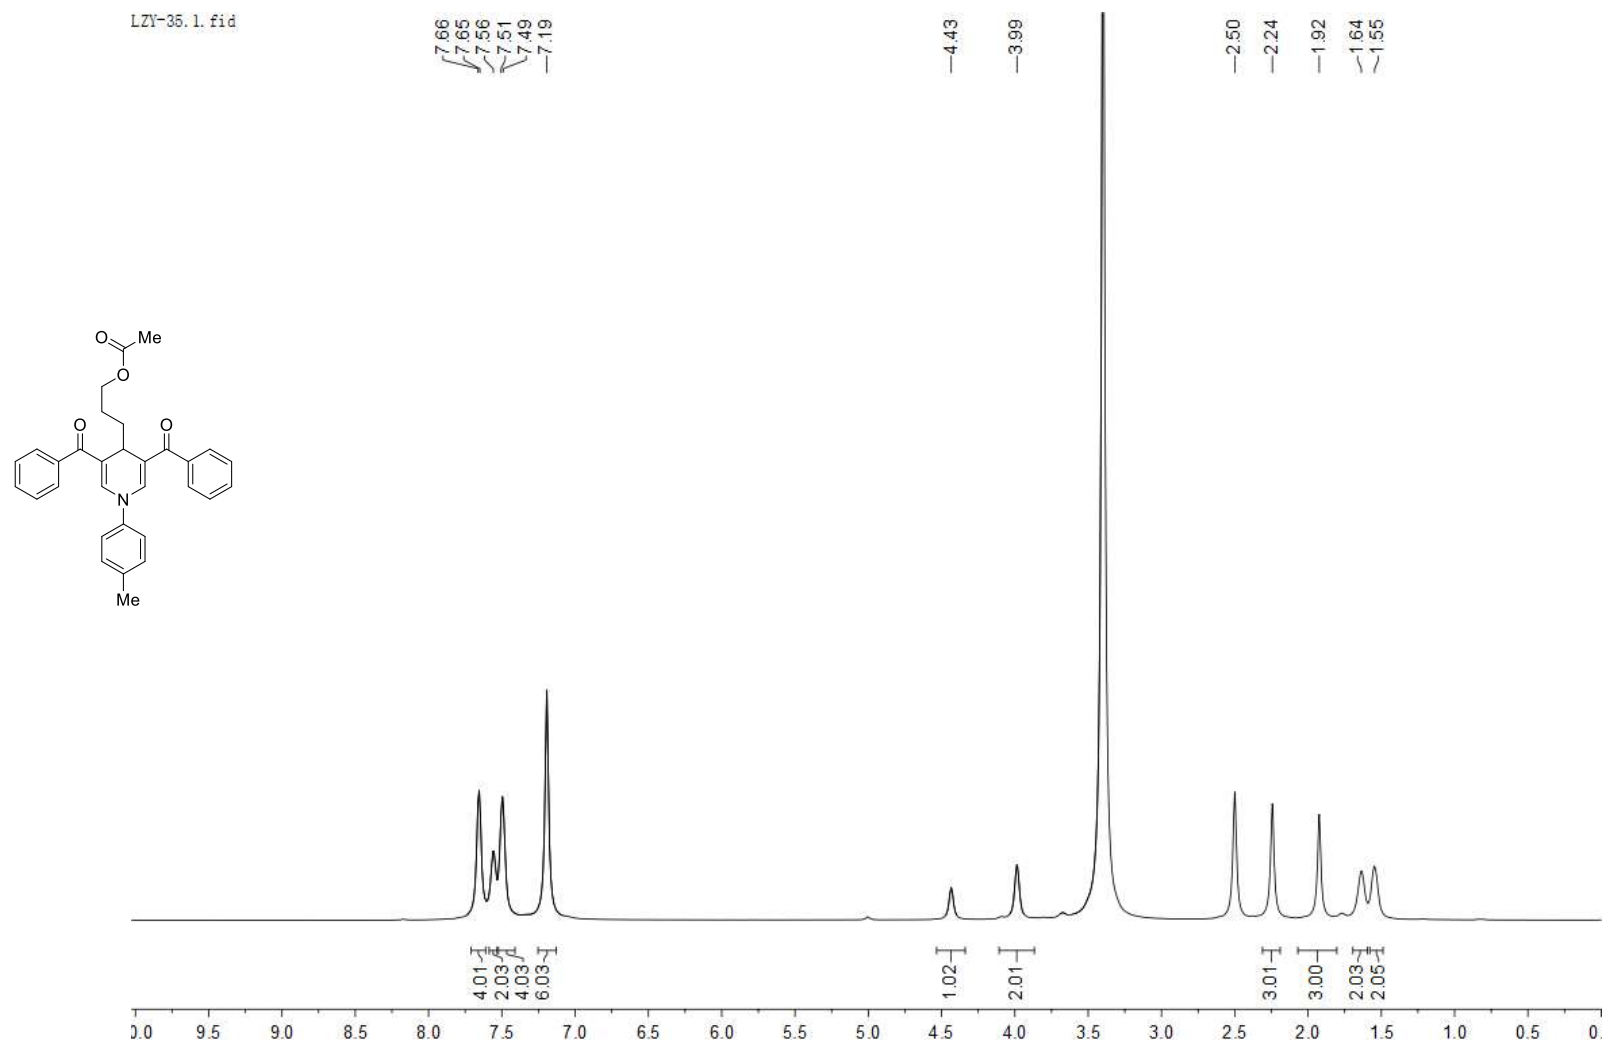

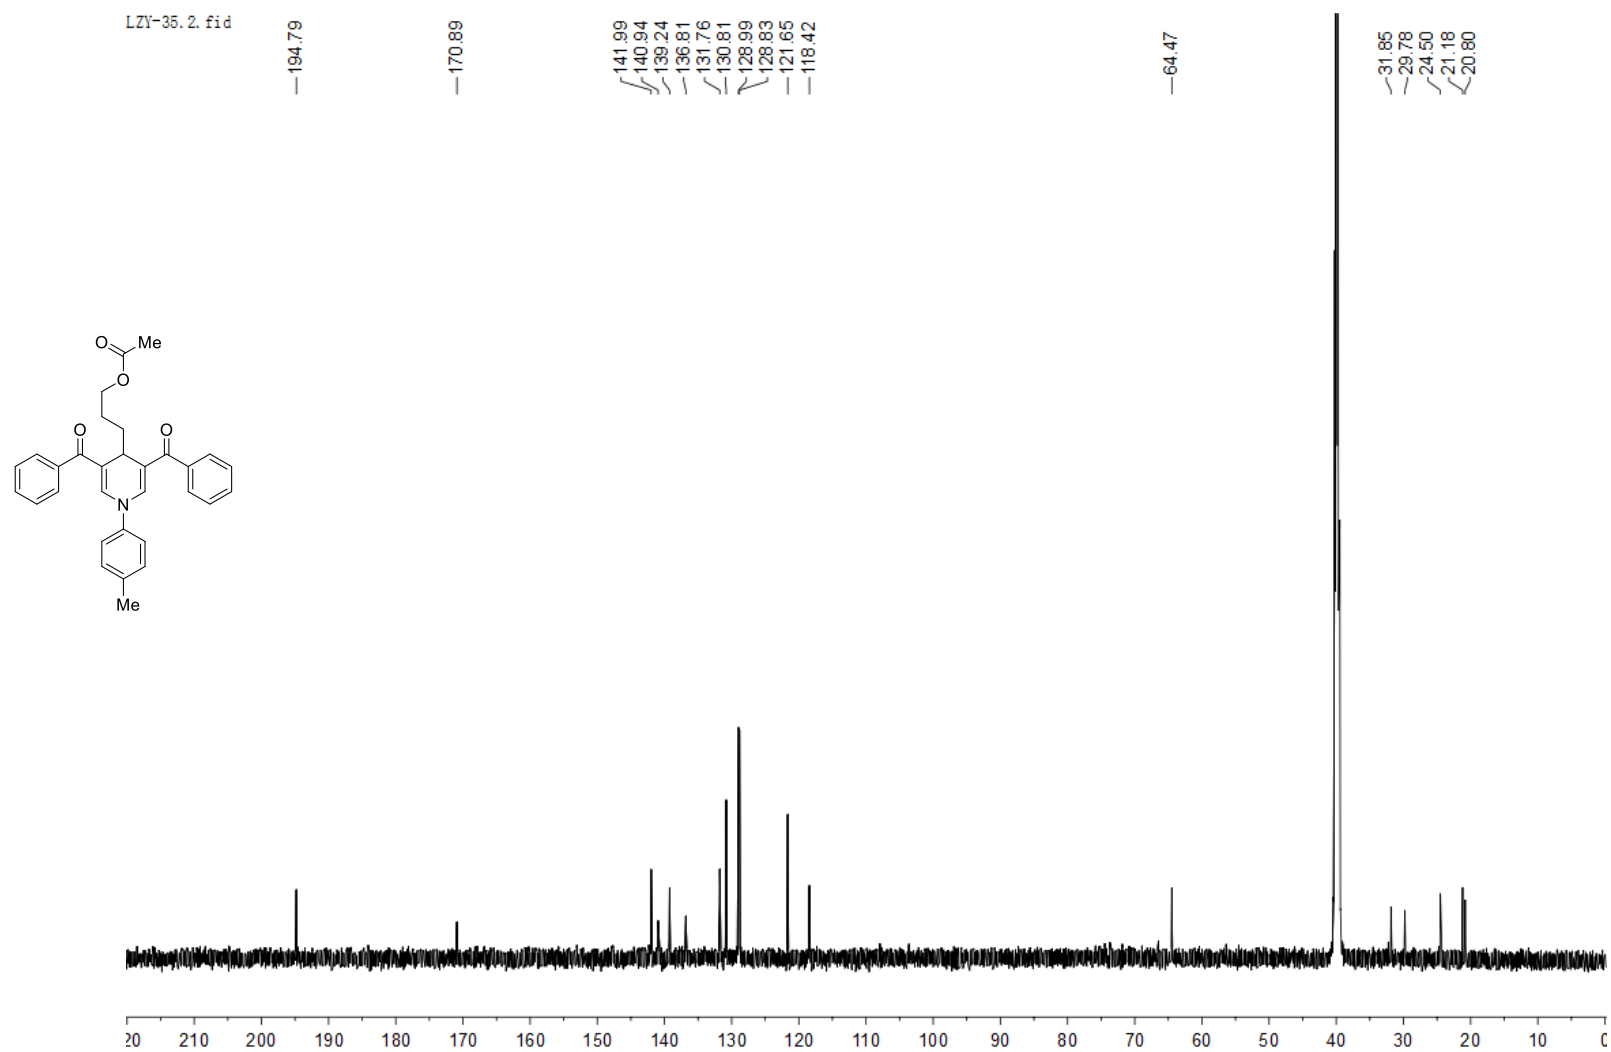

Figure S30.  $^{13}\text{C}$  NMR (150 MHz,  $\text{DMSO-}d_6$ ) spectra of compound **4o**

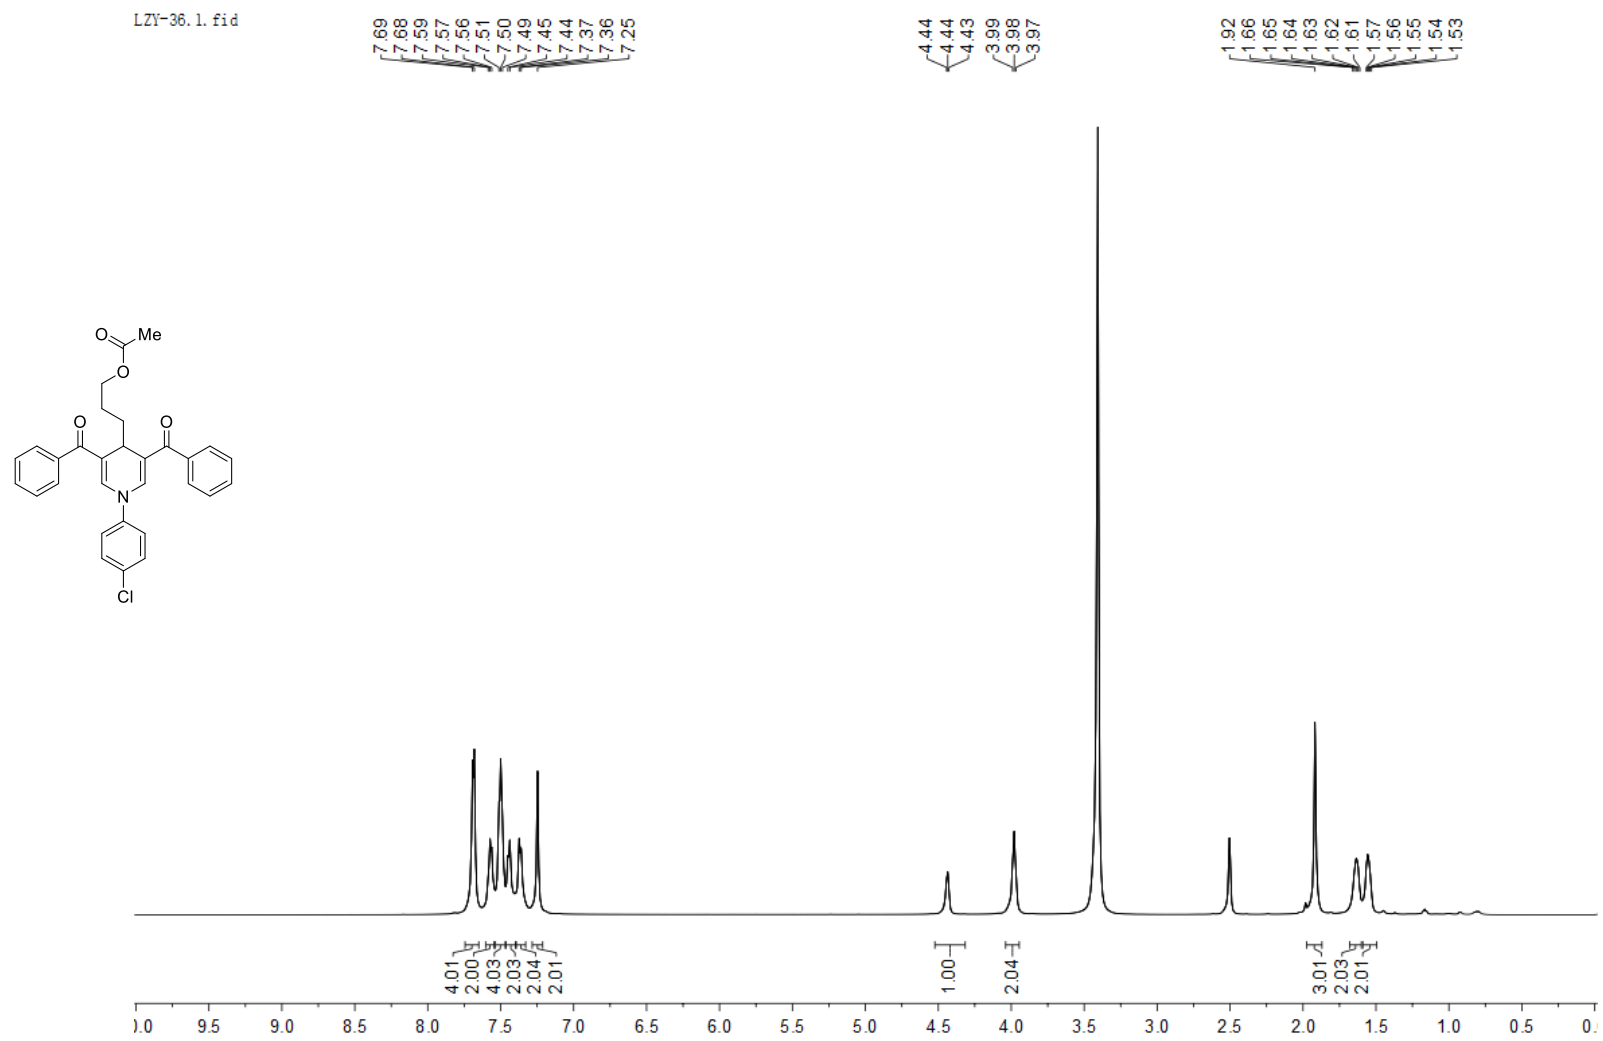

**Figure S31.**  $^1\text{H}$  NMR (600 MHz,  $\text{DMSO-}d_6$ ) spectra of compound **4p**

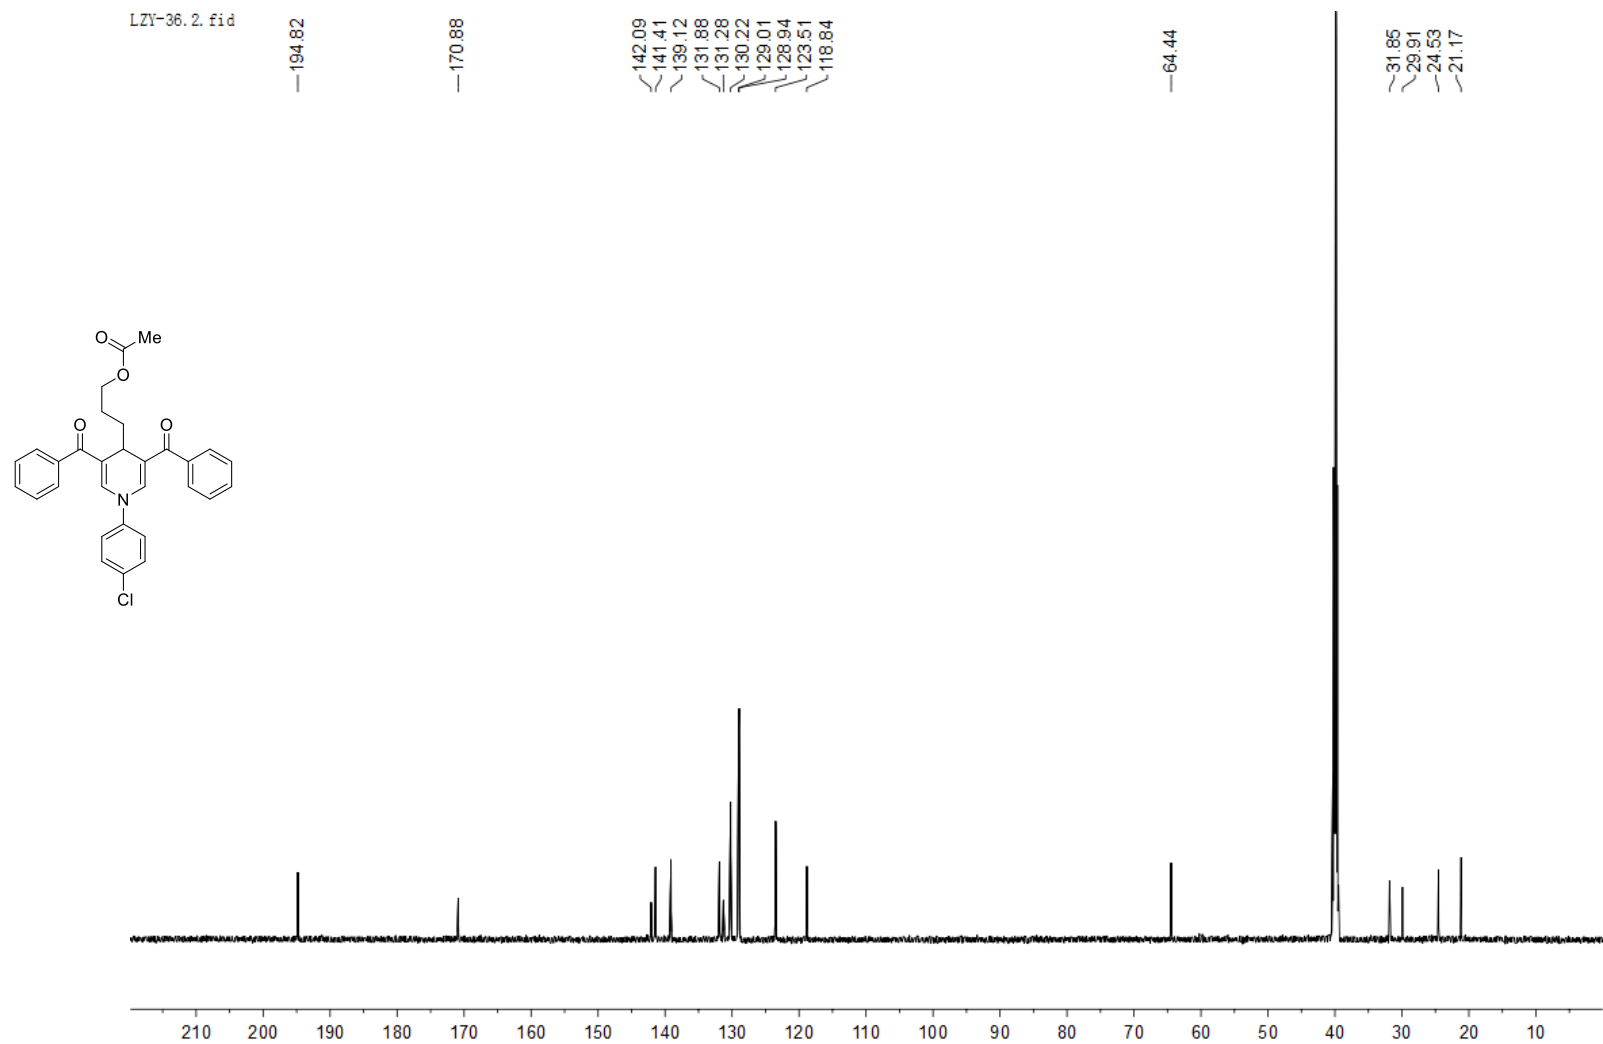

Figure S32.  $^{13}\text{C}$  NMR (150 MHz,  $\text{DMSO-}d_6$ ) spectra of compound **4p**



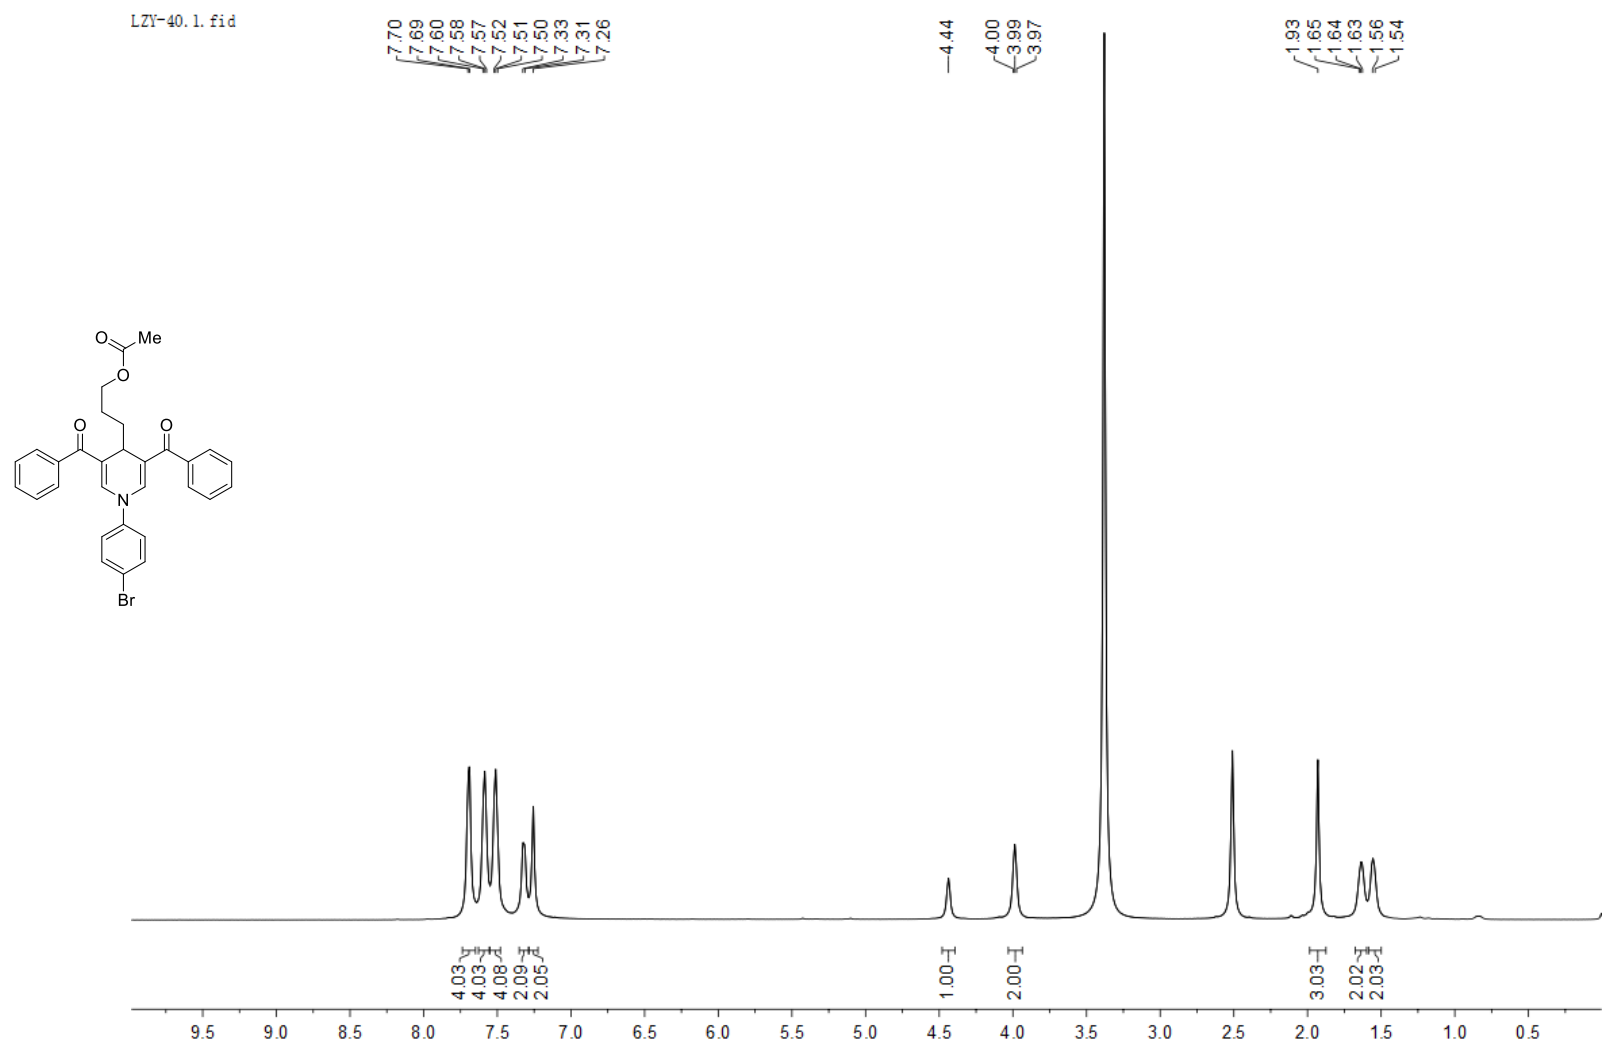

**Figure S33.**  $^1\text{H}$  NMR (600 MHz,  $\text{DMSO-}d_6$ ) spectra of compound **4q**

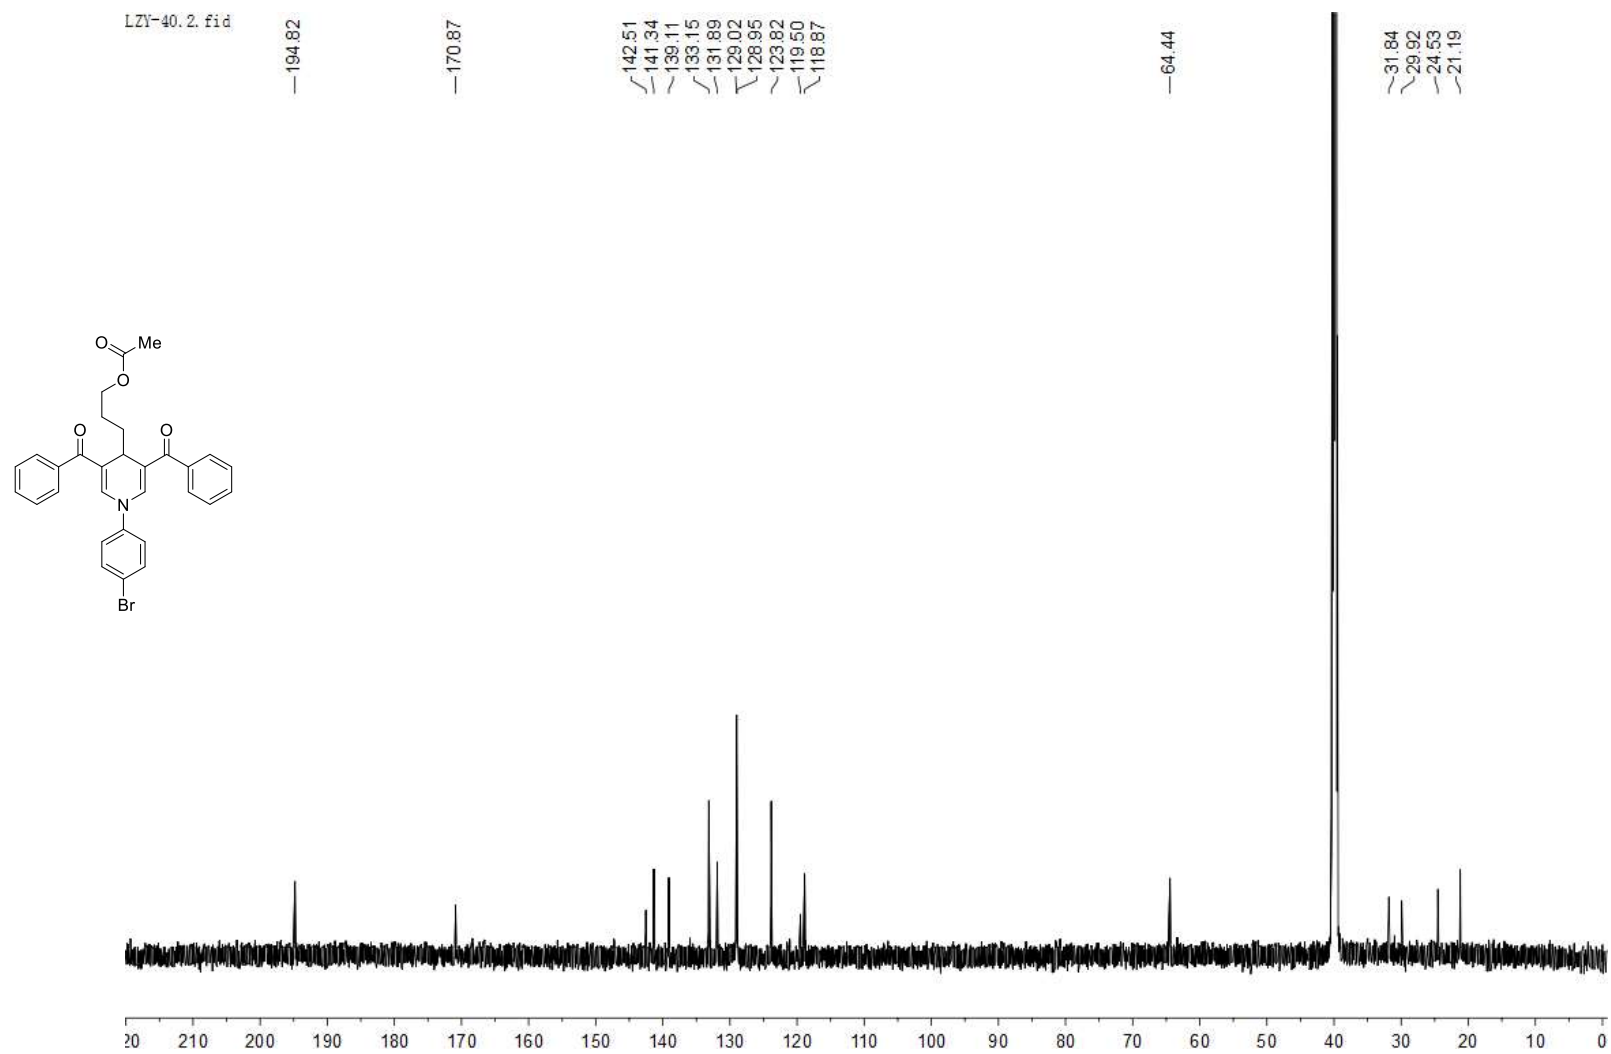

Figure S34.  $^{13}\text{C}$  NMR (150 MHz,  $\text{DMSO-}d_6$ ) spectra of compound **4q**

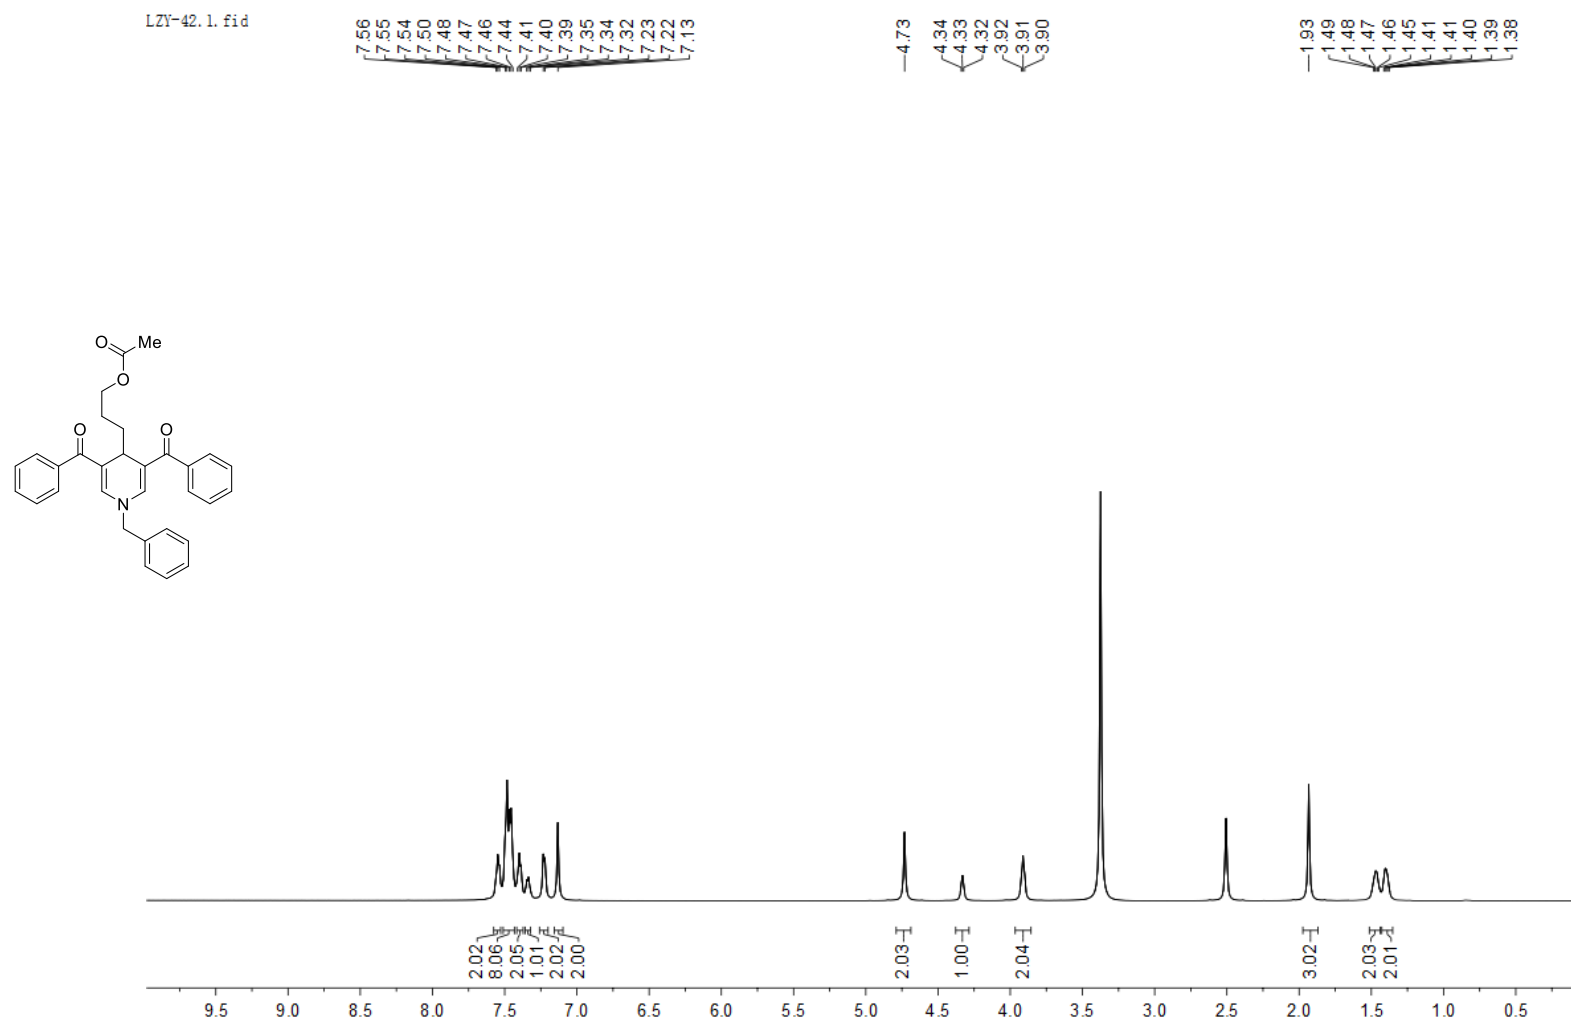

**Figure S35.**  $^1\text{H}$  NMR (600 MHz,  $\text{DMSO-}d_6$ ) spectra of compound **4r**

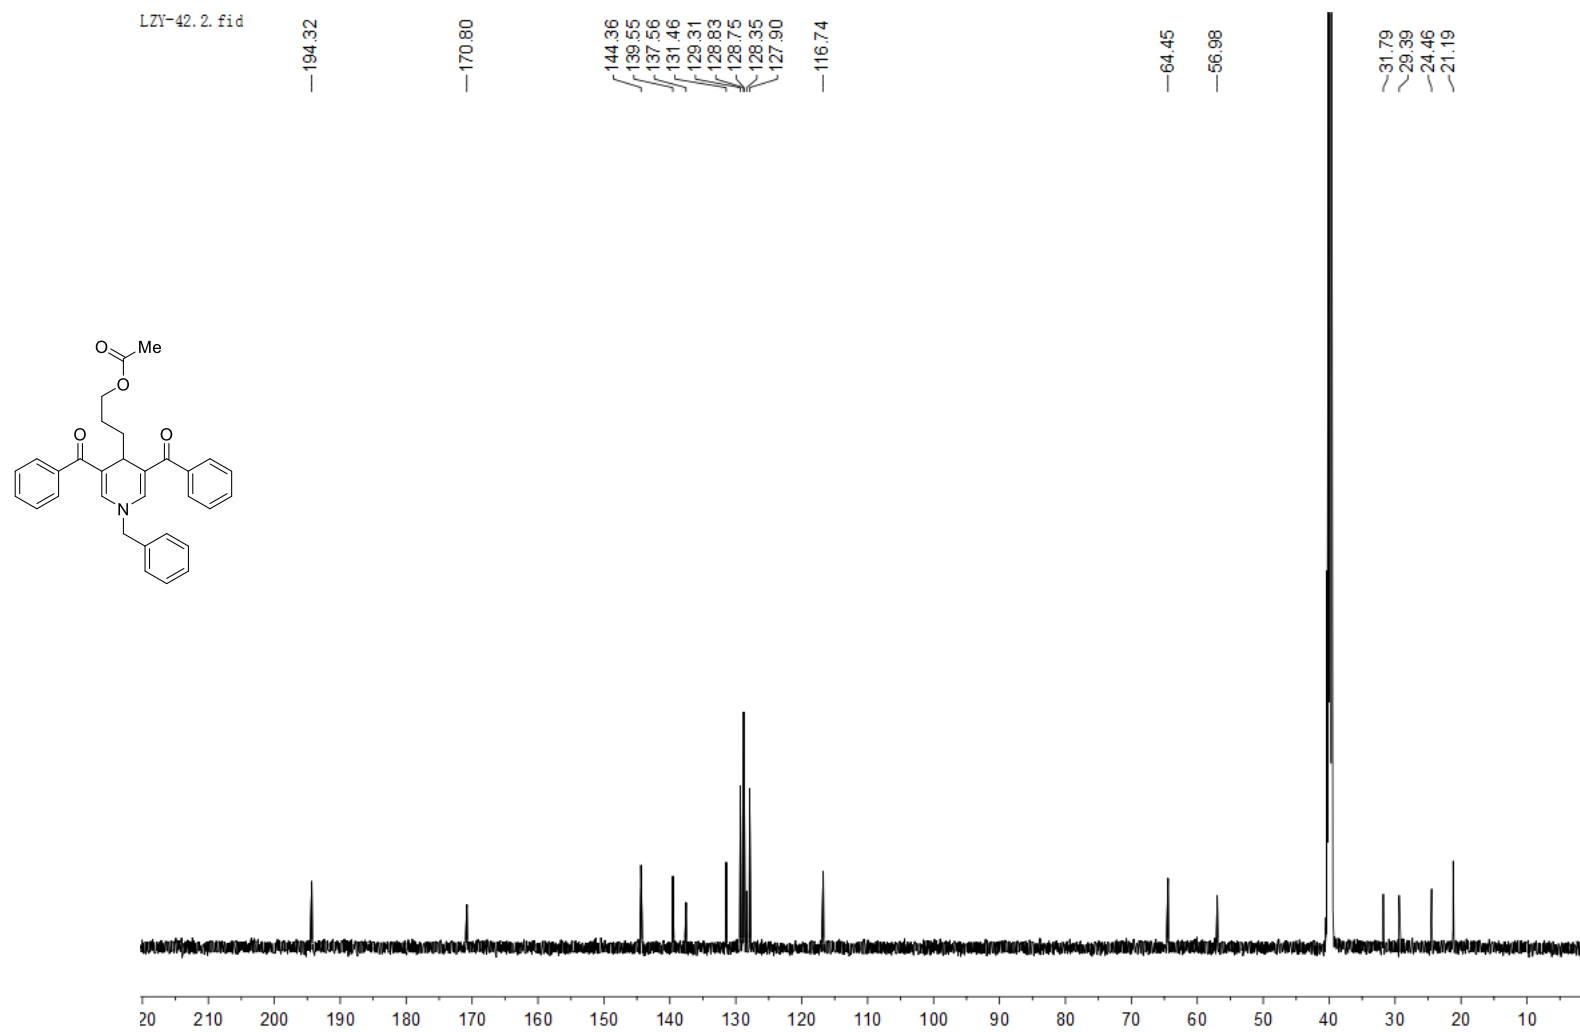

**Figure S36.**  $^{13}\text{C}$  NMR (150 MHz,  $\text{DMSO-}d_6$ ) spectra of compound **4r**

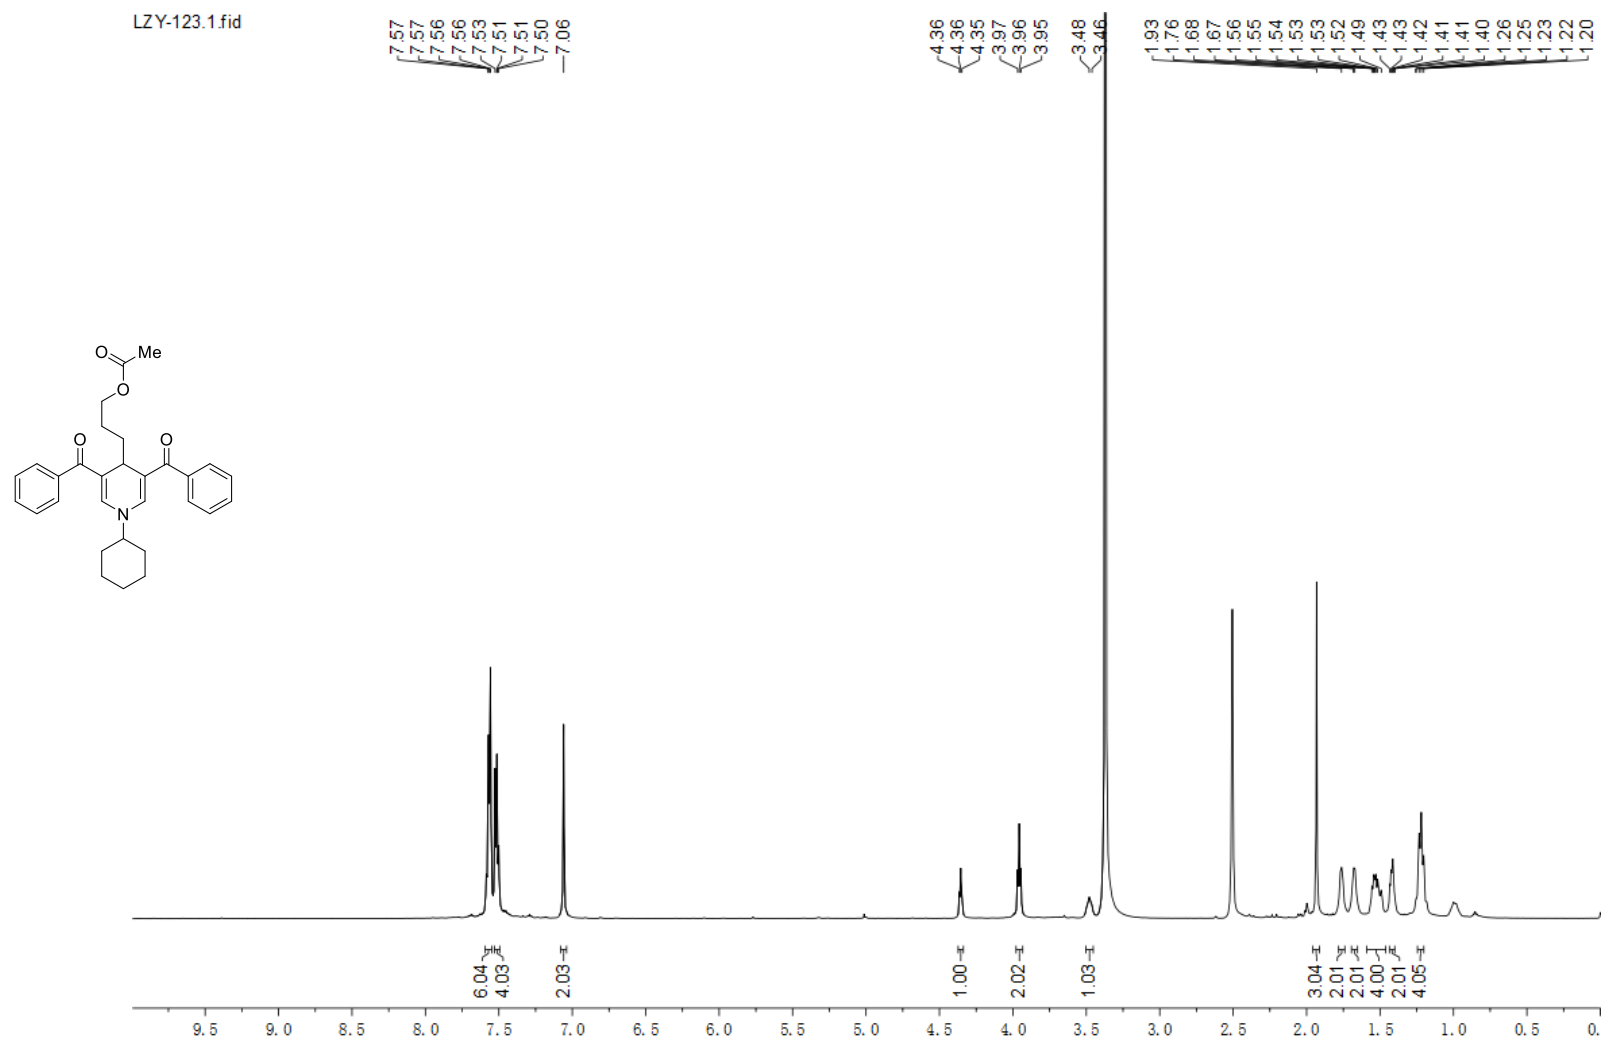

**Figure S37.**  $^1\text{H}$  NMR (600 MHz,  $\text{DMSO-}d_6$ ) spectra of compound **4s**

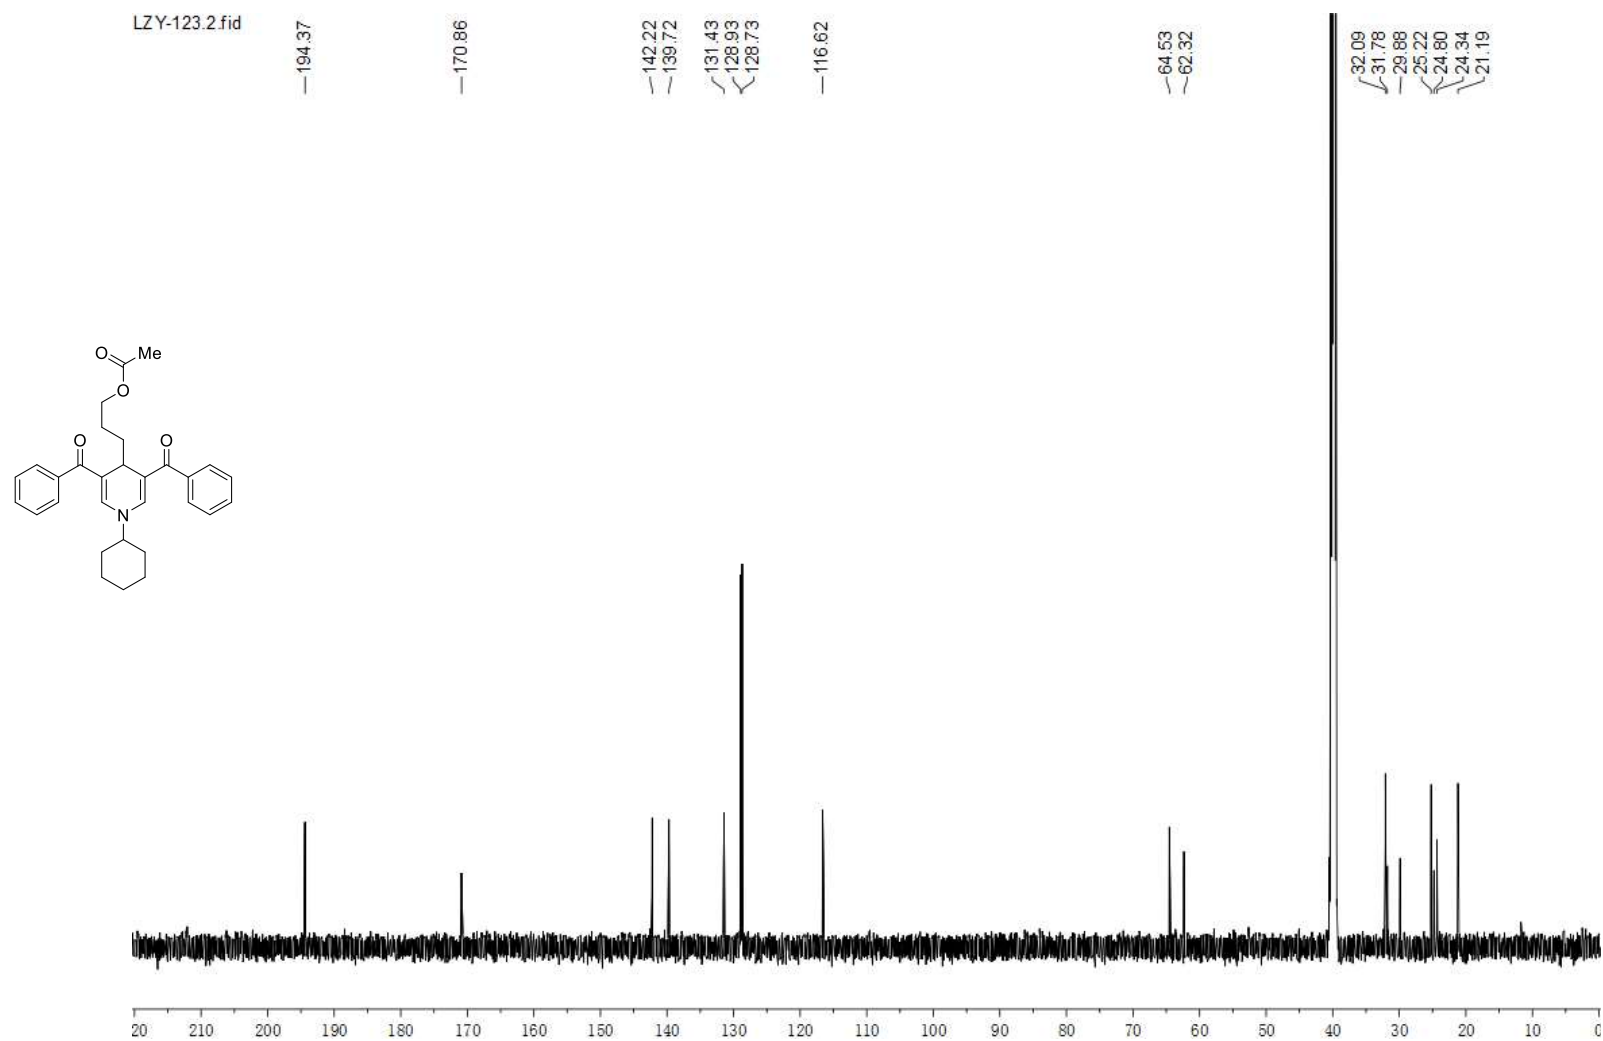

Figure S38.  $^{13}\text{C}$  NMR (150 MHz,  $\text{DMSO-}d_6$ ) spectra of compound **4s**

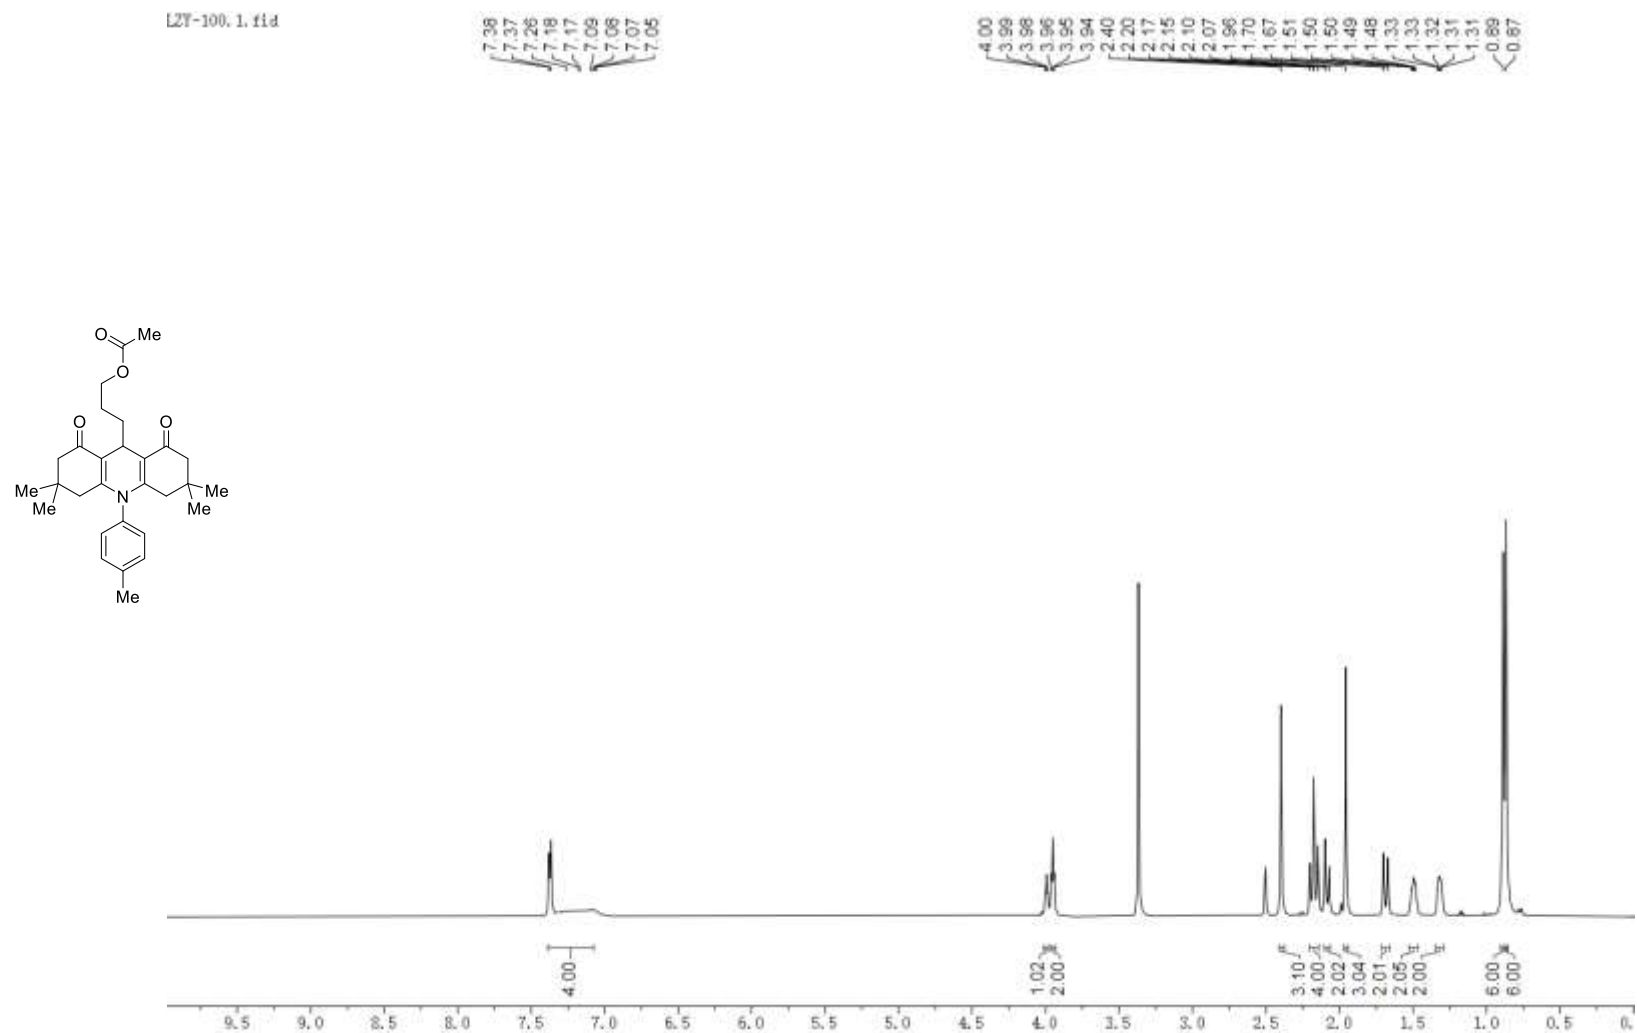

**Figure S39.** <sup>1</sup>H NMR (600 MHz, DMSO-*d*<sub>6</sub>) spectra of compound **4t**

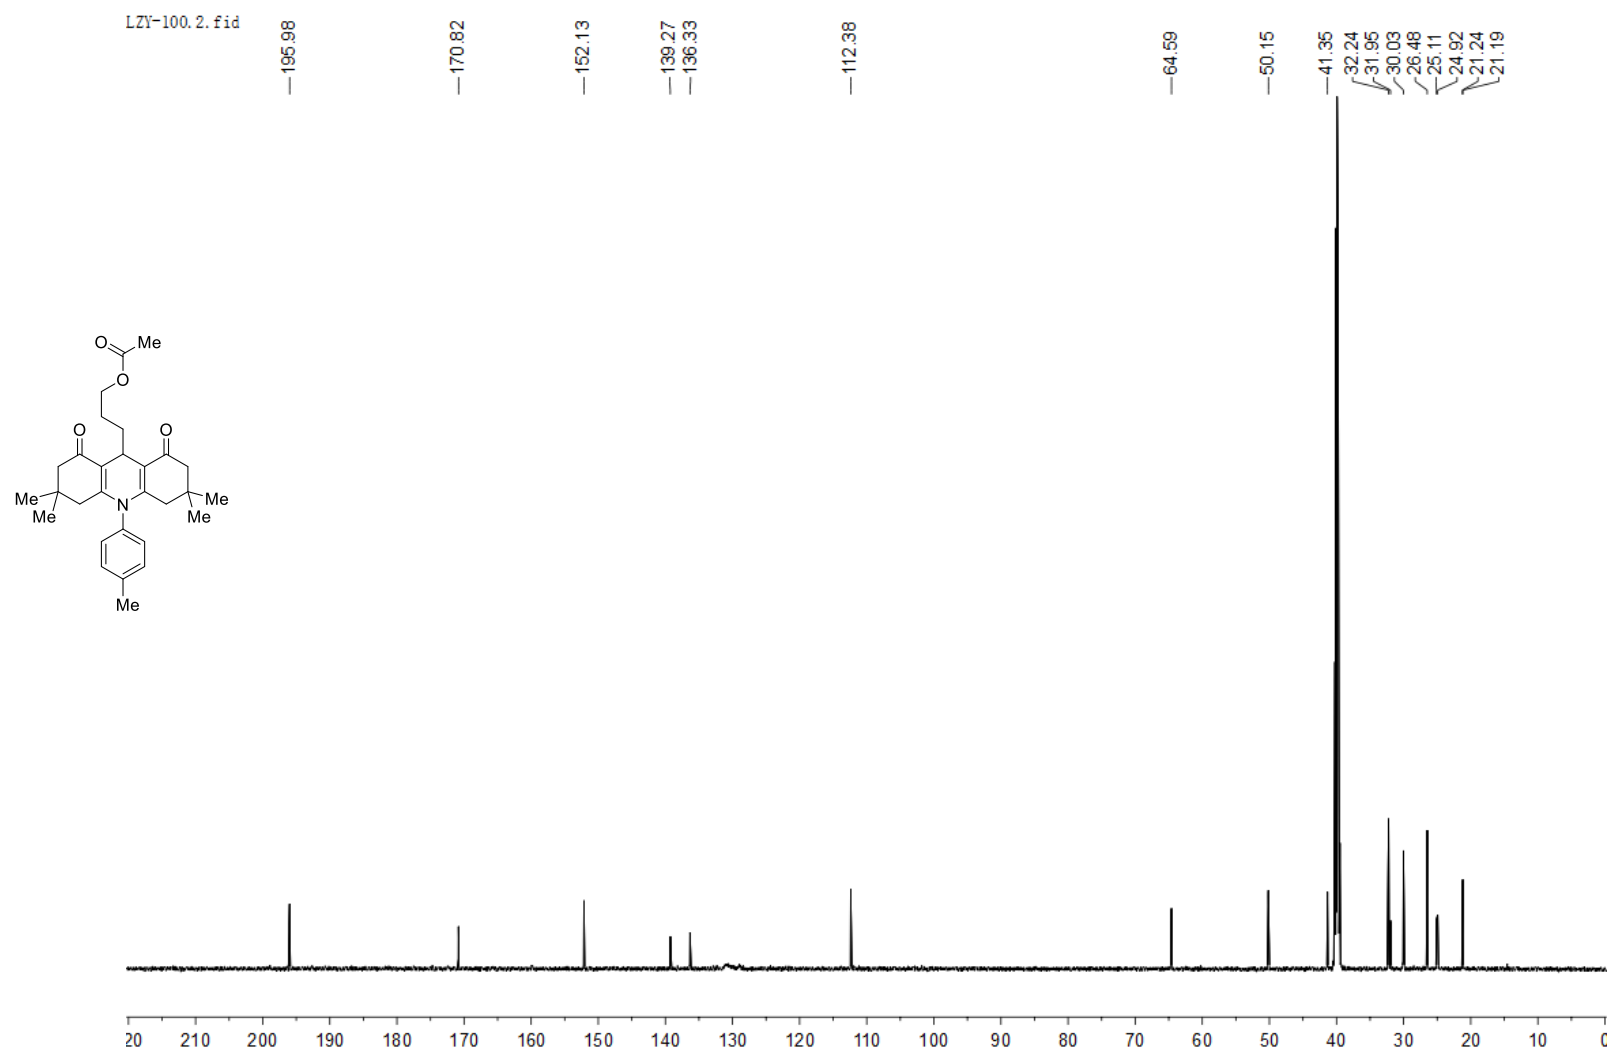

Figure S40.  $^{13}\text{C}$  NMR (150 MHz,  $\text{DMSO-}d_6$ ) spectra of compound **4t**



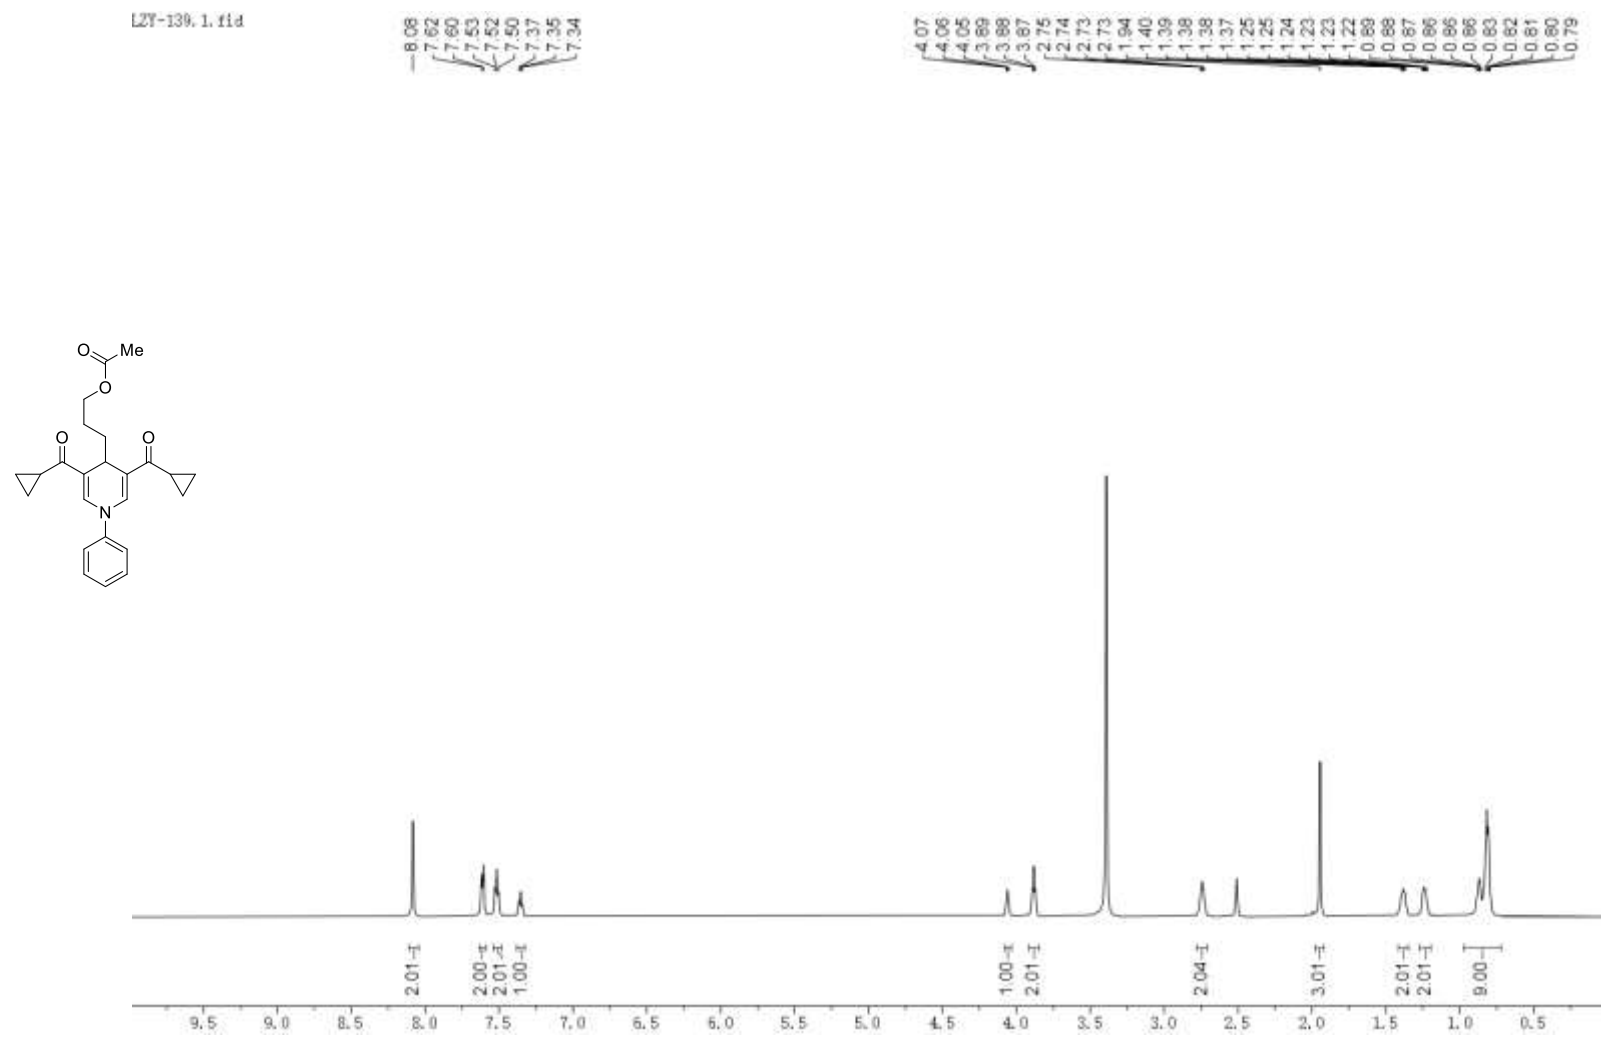

Figure S41. <sup>1</sup>H NMR (600 MHz, DMSO-*d*<sub>6</sub>) spectra of compound 4u (LZY-139)

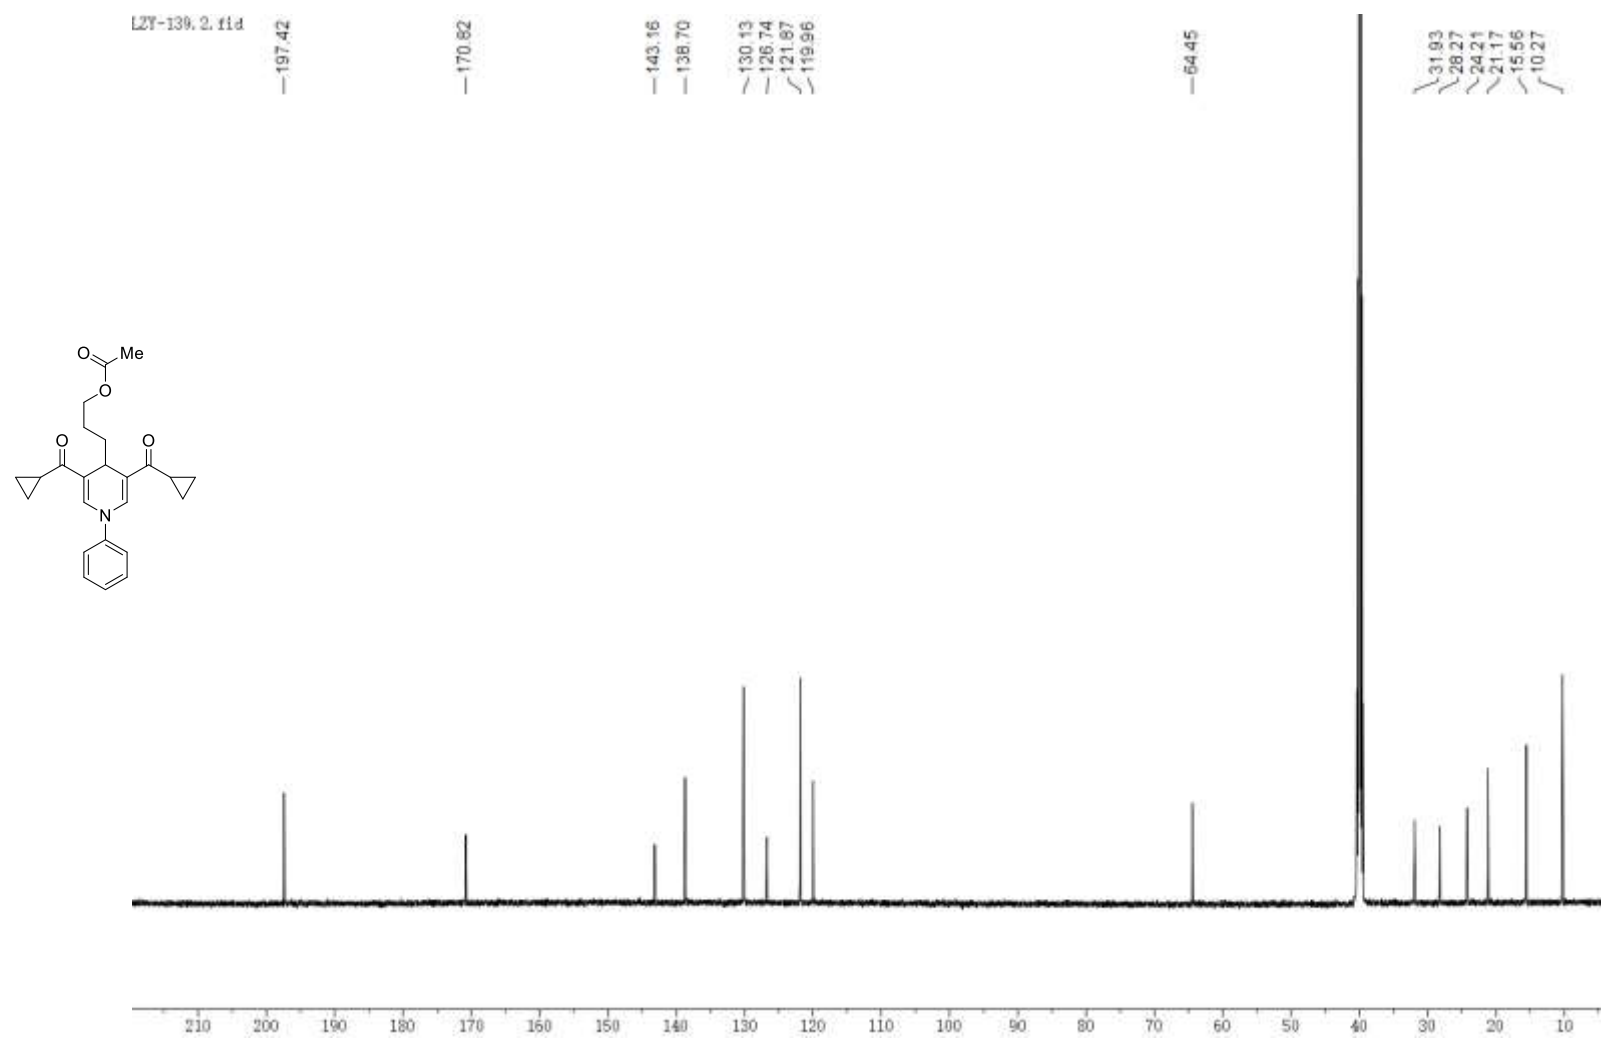

Figure S42.  $^{13}\text{C}$  NMR (150 MHz,  $\text{DMSO-}d_6$ ) spectra of compound **4u**

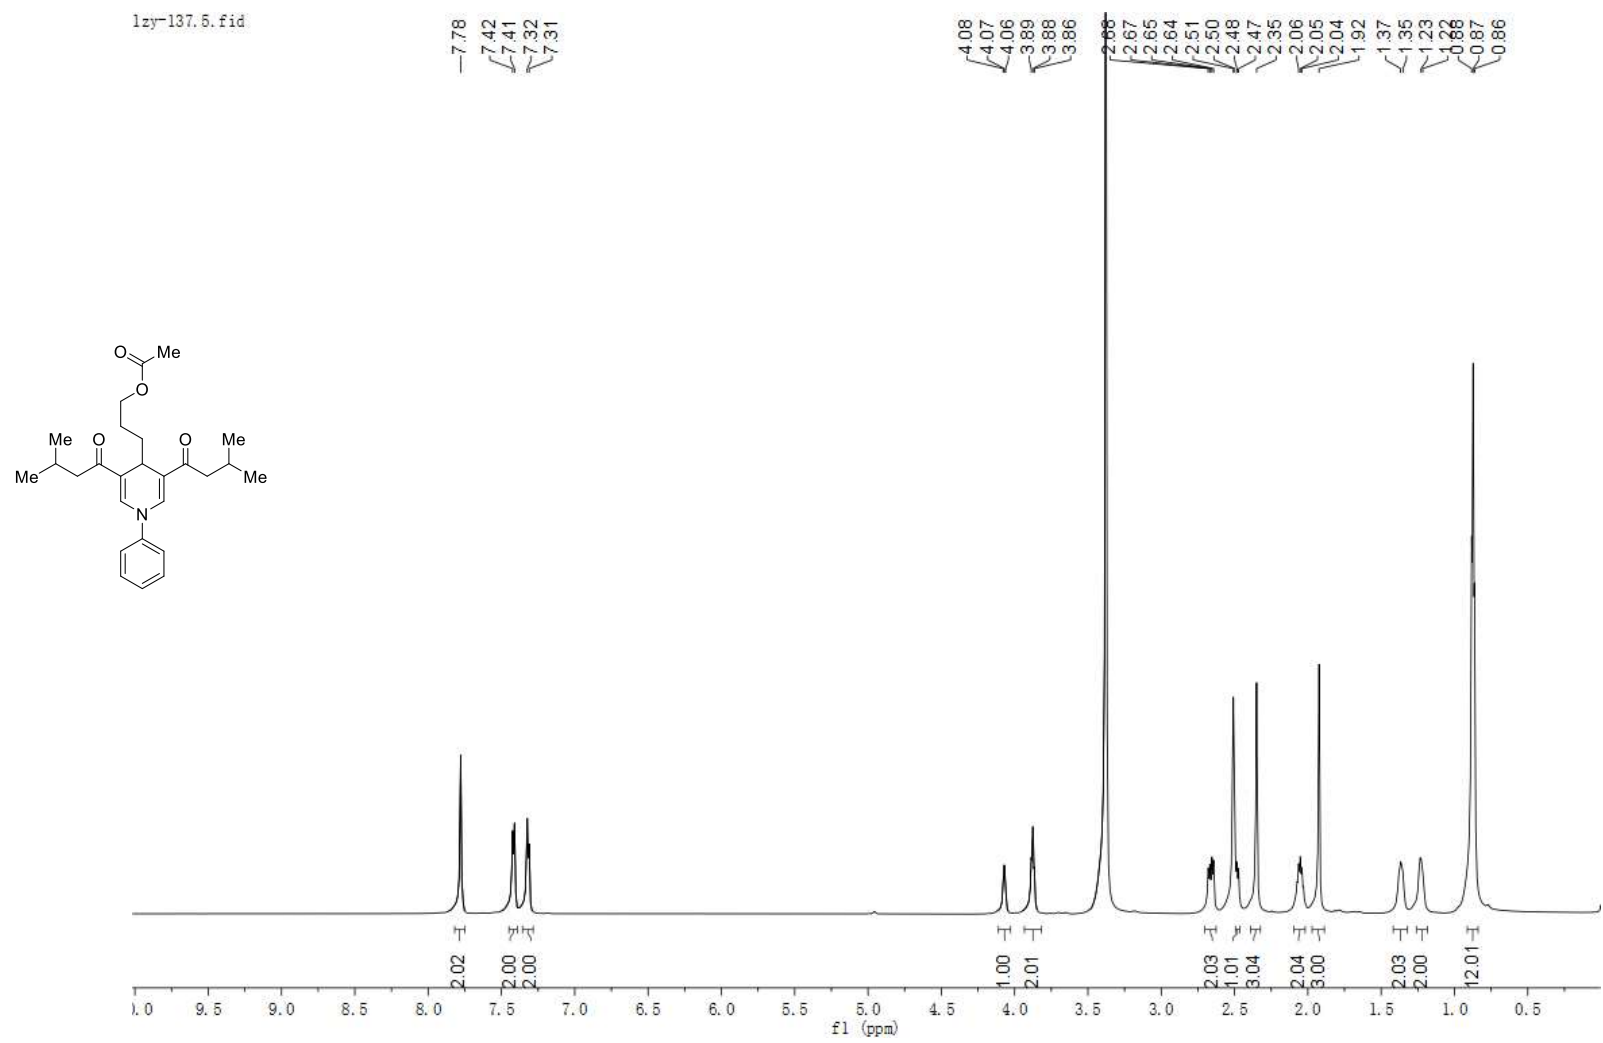

**Figure S43.**  $^1\text{H}$  NMR (600 MHz,  $\text{DMSO-}d_6$ ) spectra of compound **4v**



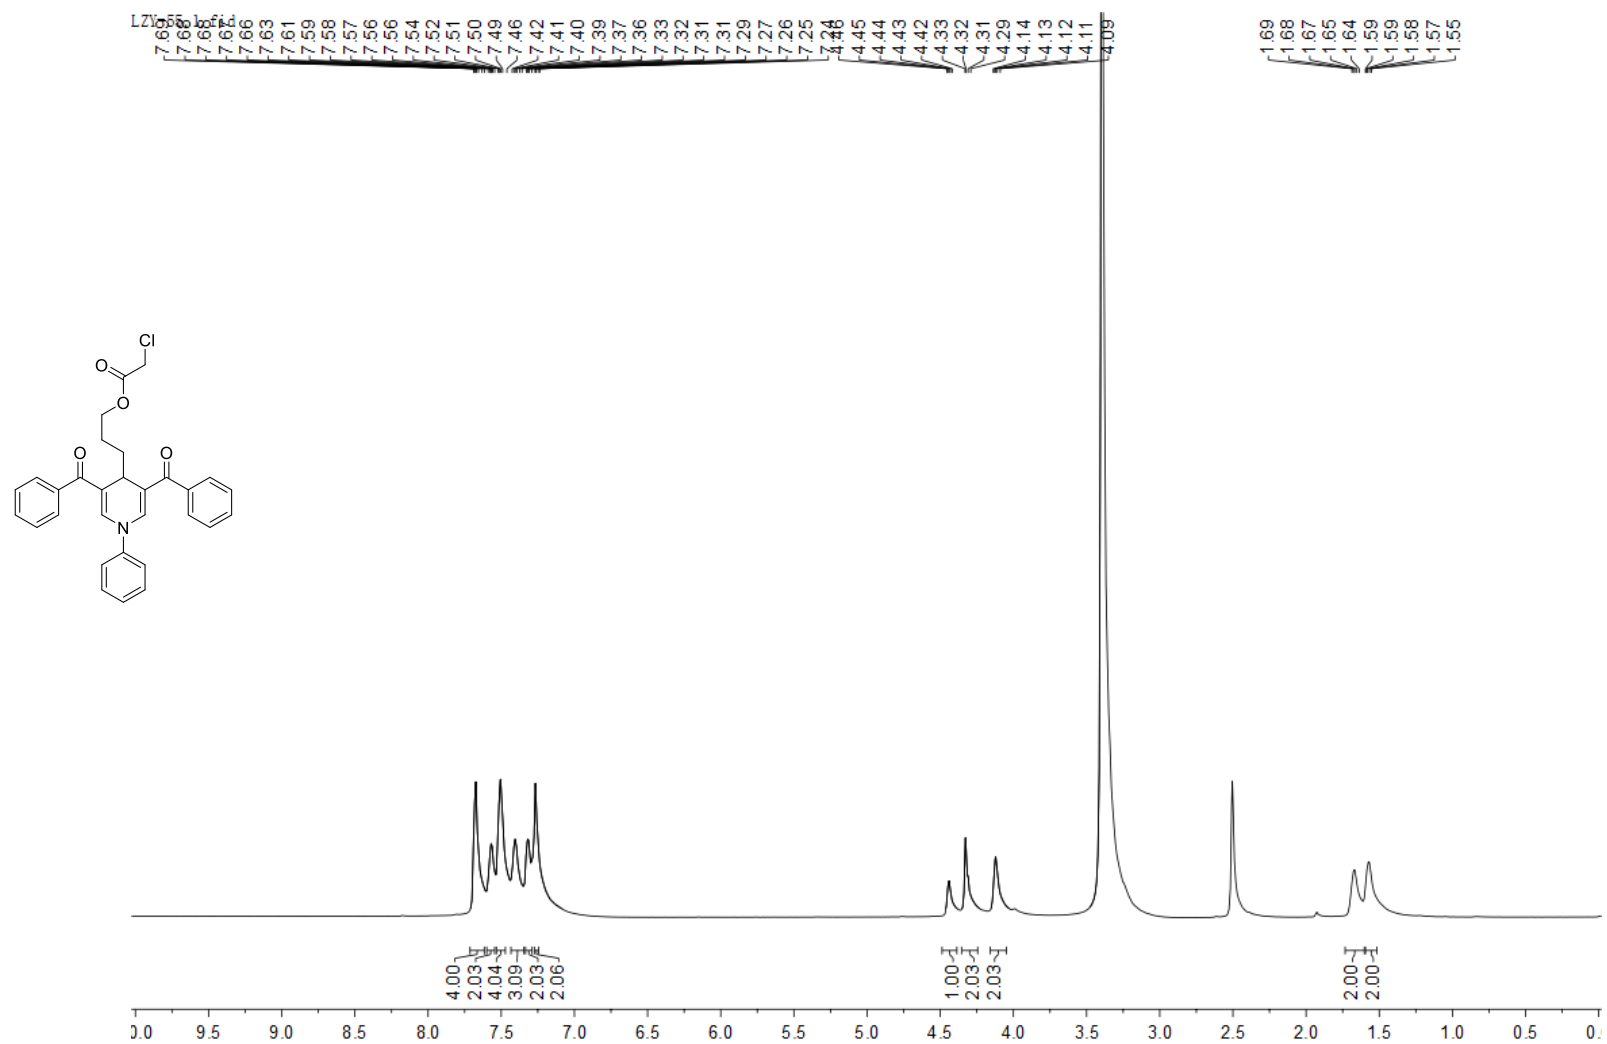

**Figure S45.**  $^1\text{H NMR}$  (600 MHz,  $\text{DMSO-}d_6$ ) spectra of compound **4w**

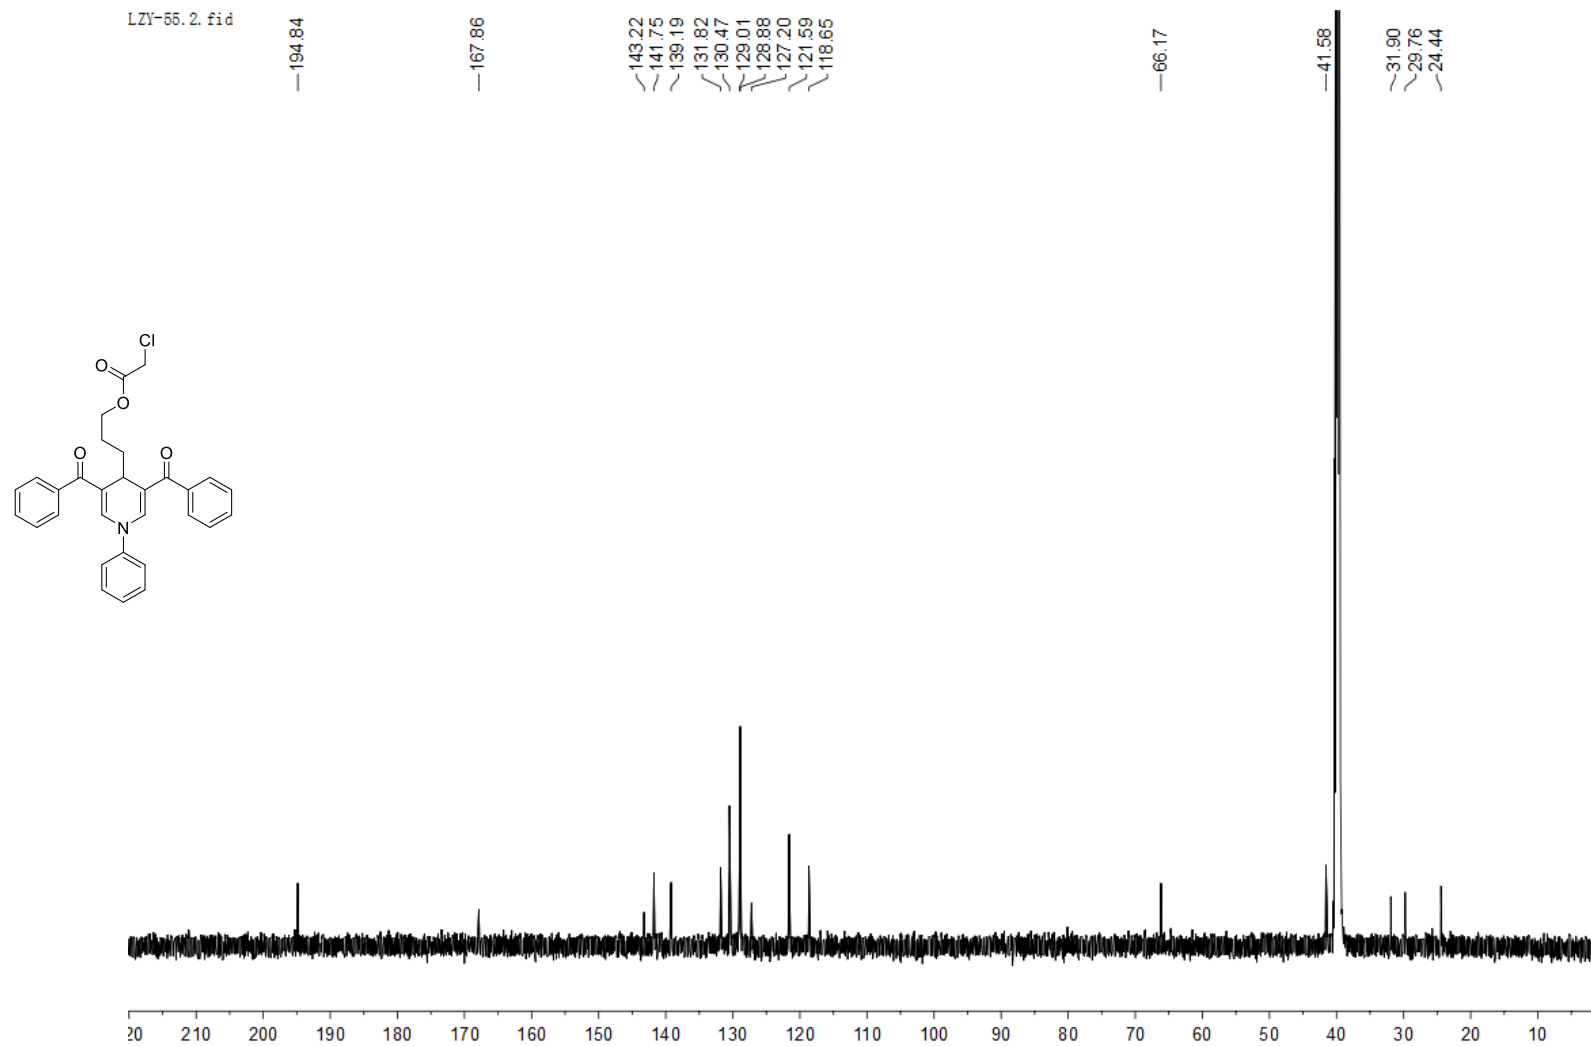

Figure S46.  $^{13}\text{C}$  NMR (150 MHz,  $\text{DMSO-}d_6$ ) spectra of compound 4w

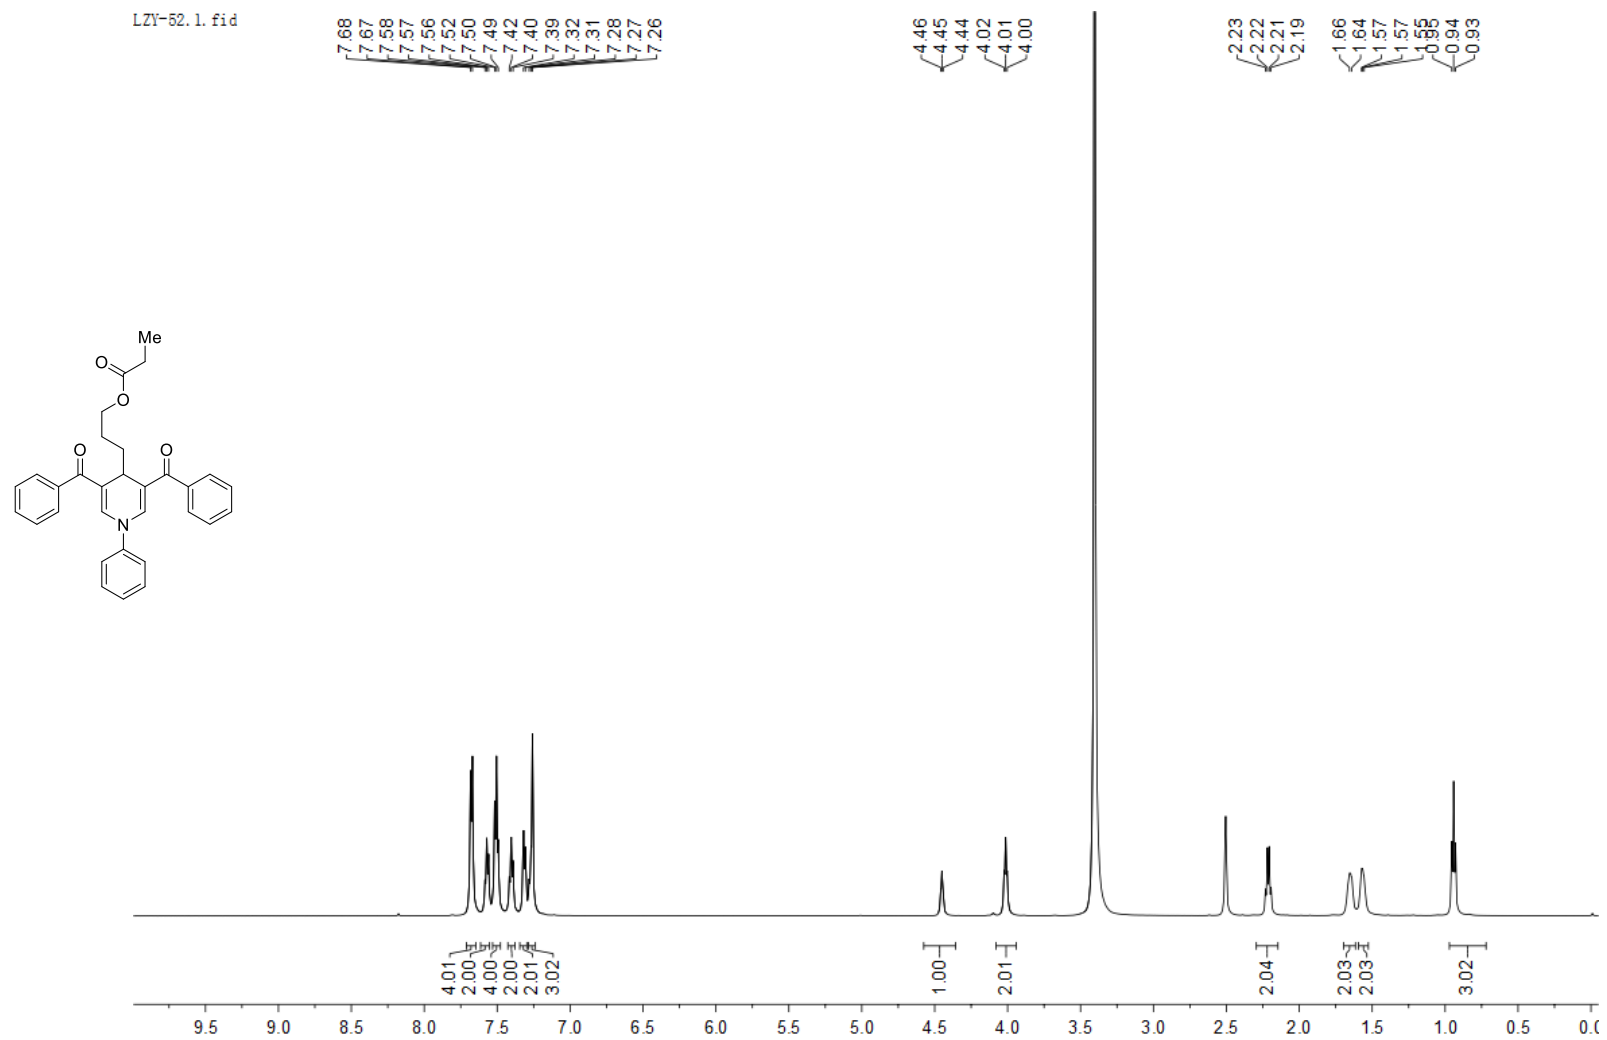

**Figure S47.**  $^1\text{H}$  NMR (600 MHz,  $\text{DMSO-}d_6$ ) spectra of compound **4x**

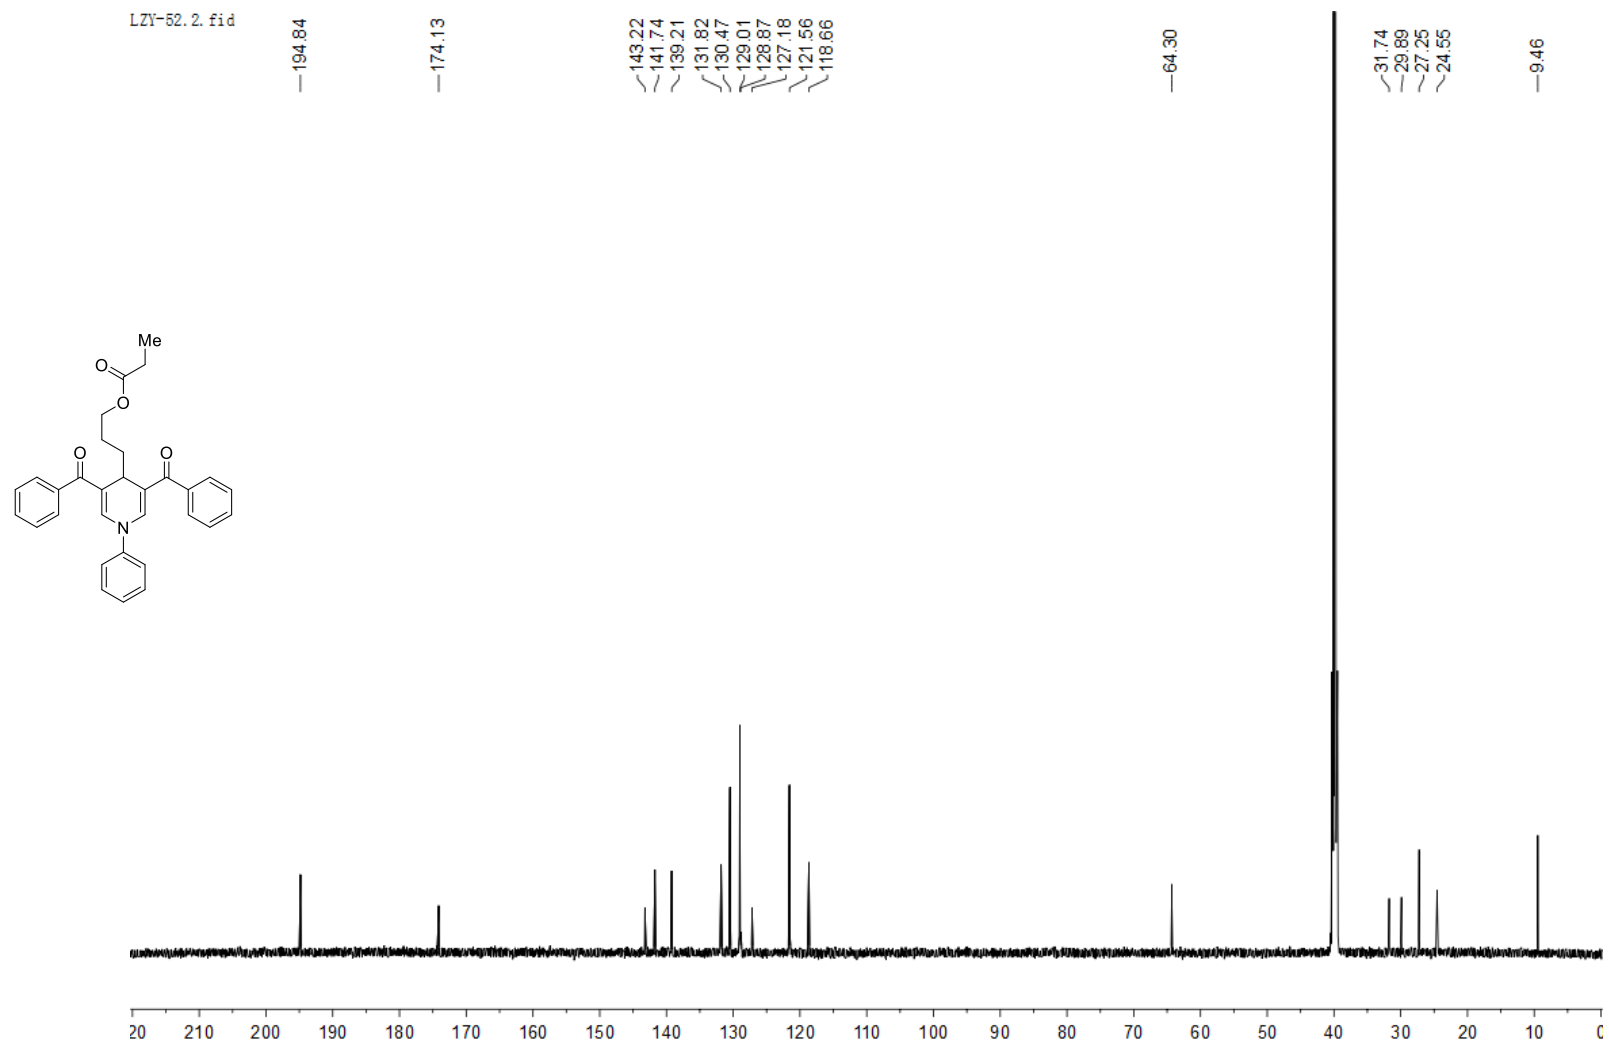

Figure S48.  $^{13}\text{C}$  NMR (150 MHz,  $\text{DMSO-}d_6$ ) spectra of compound **4x**



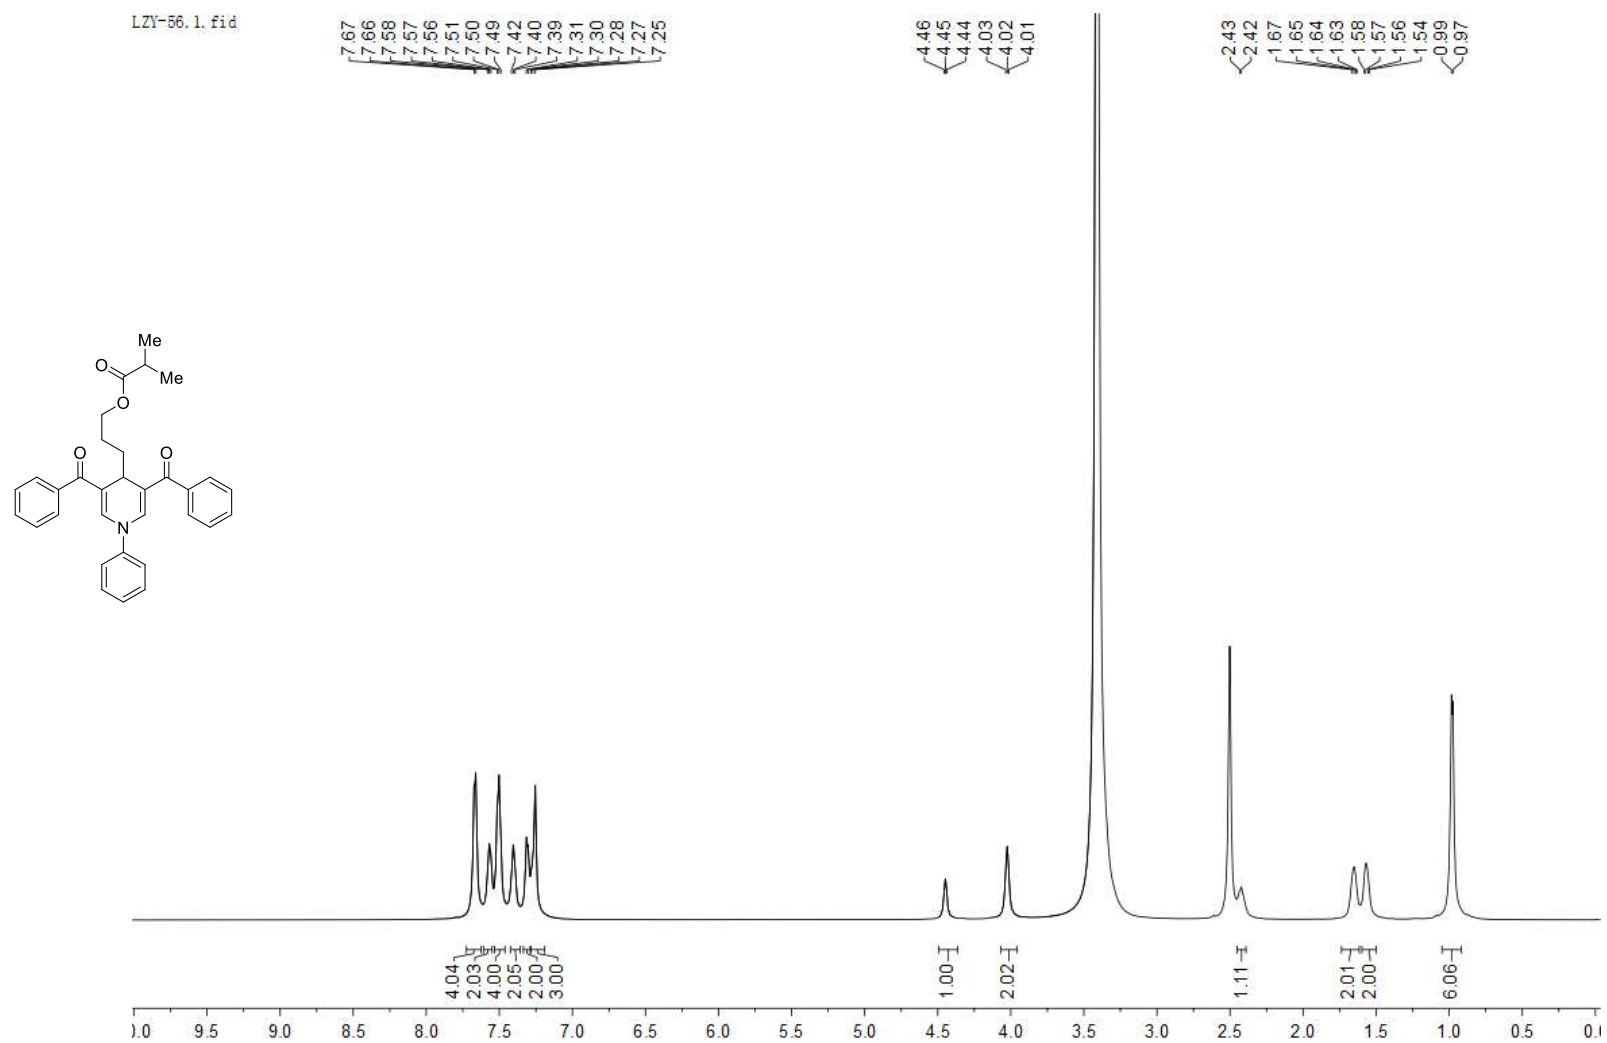

**Figure S49.**  $^1\text{H}$  NMR (600 MHz,  $\text{DMSO-}d_6$ ) spectra of compound **4y**

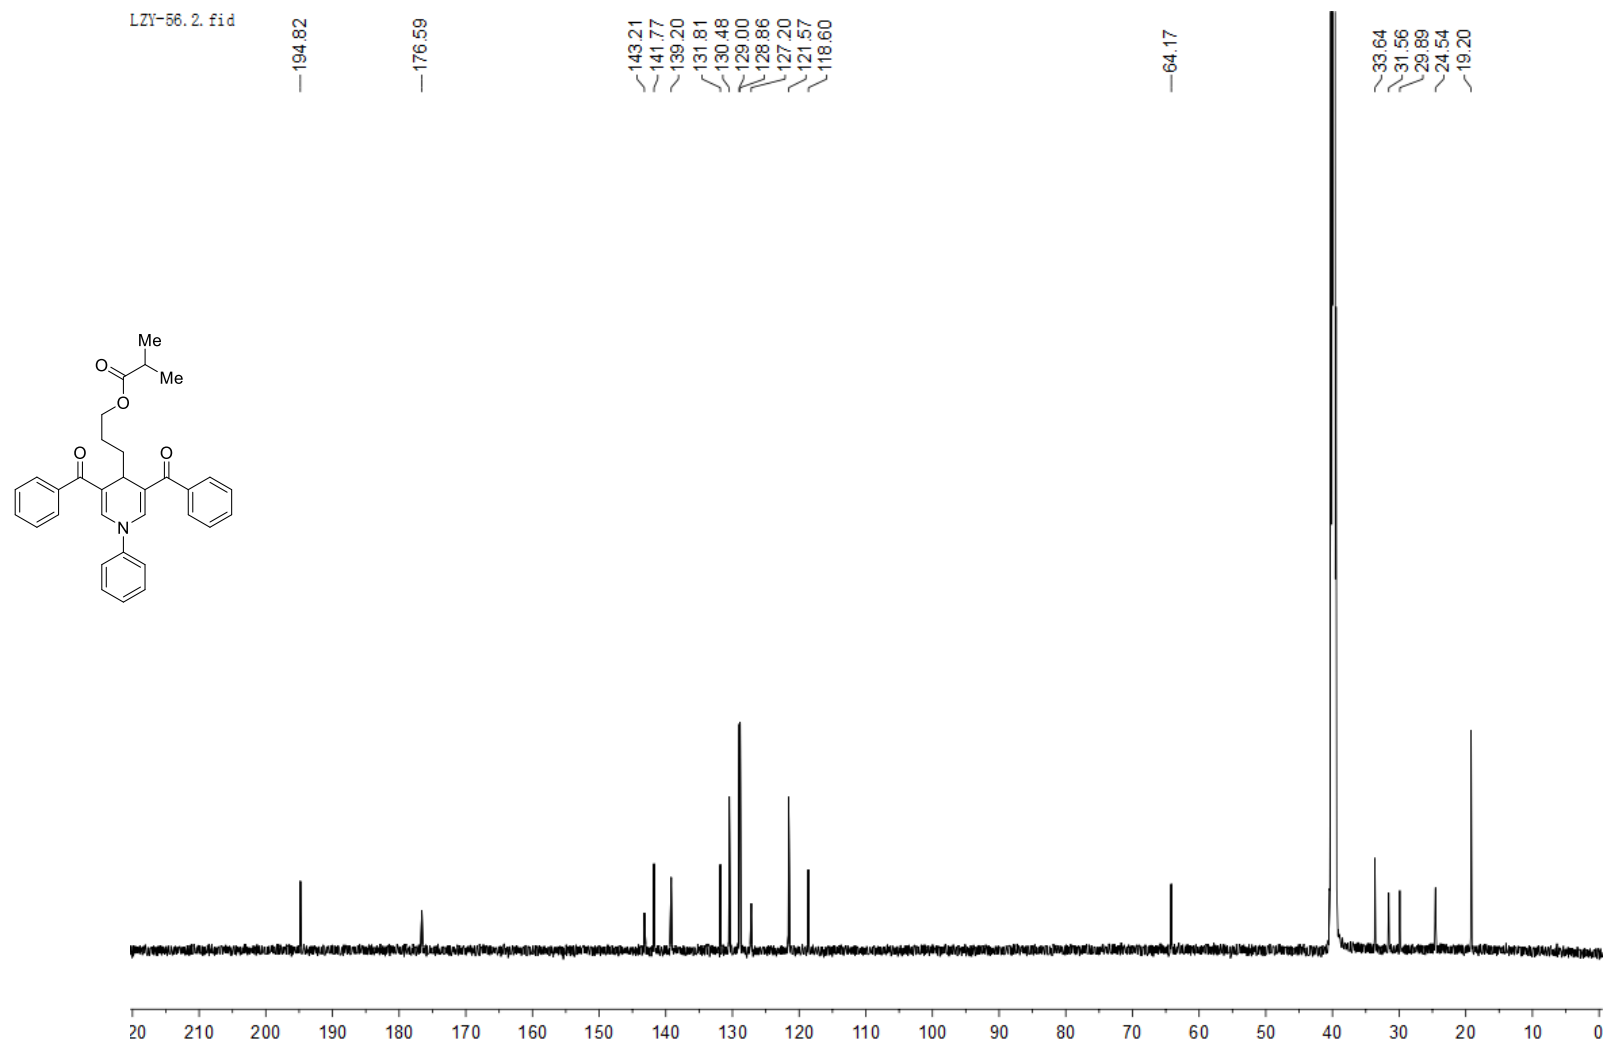

Figure S50.  $^{13}\text{C}$  NMR (150 MHz,  $\text{DMSO-}d_6$ ) spectra of compound **4y**

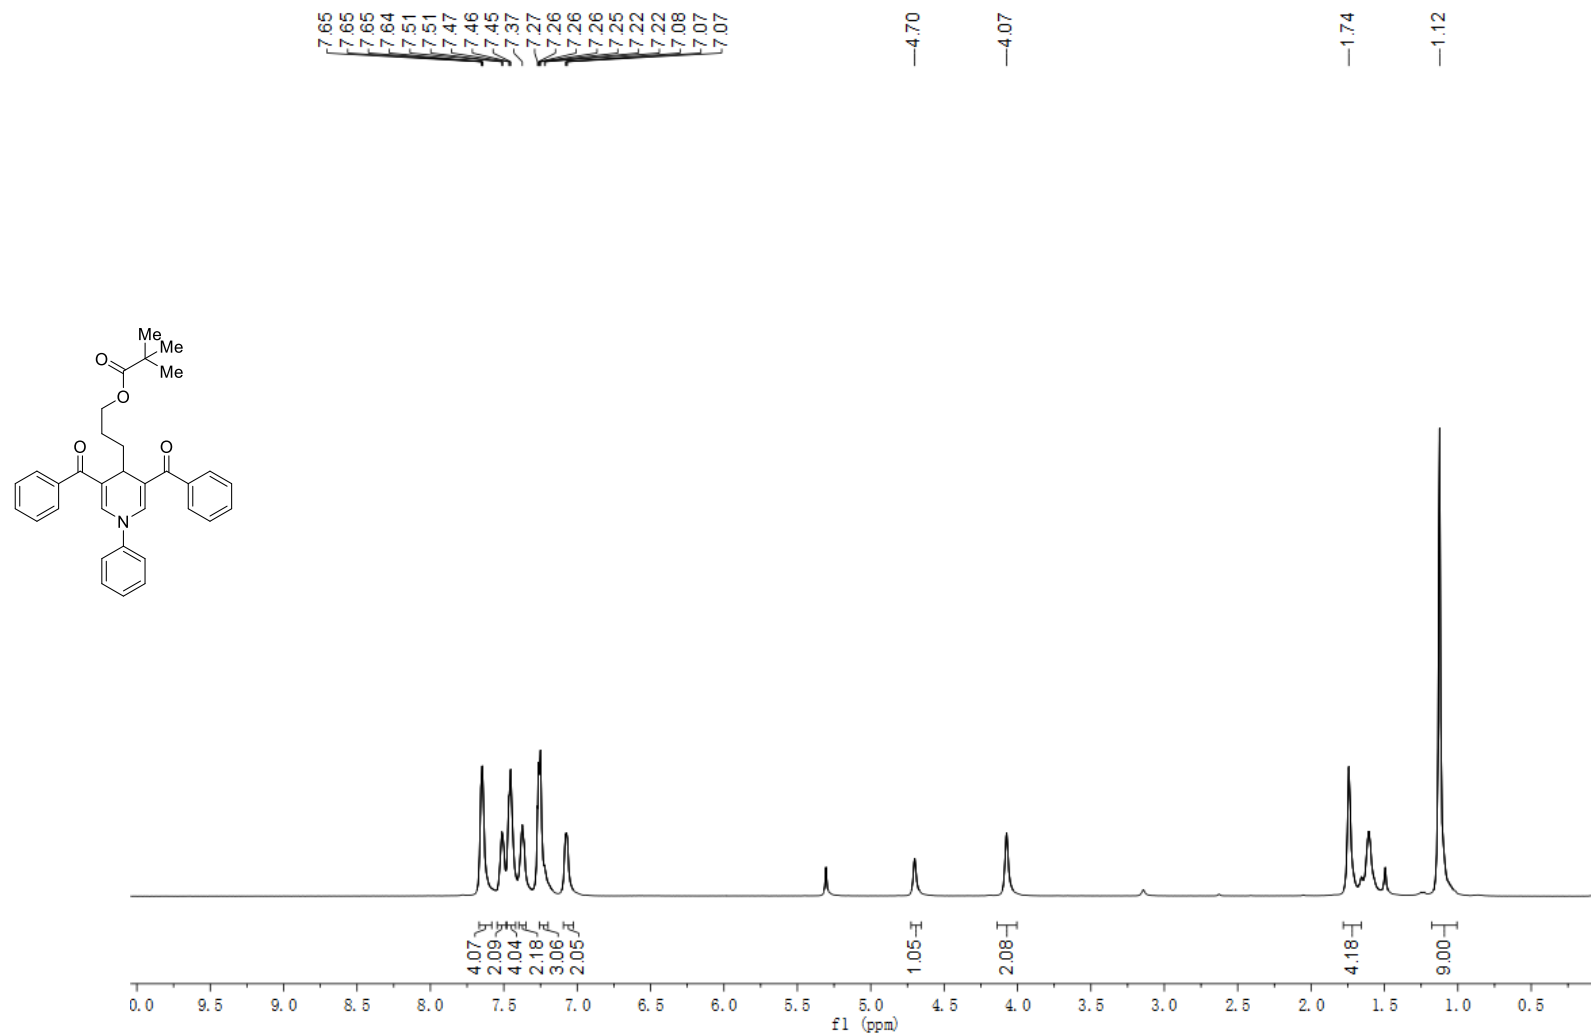

**Figure S51.**  $^1\text{H NMR}$  (600 MHz,  $\text{CDCl}_3$ ) spectra of compound **4z**

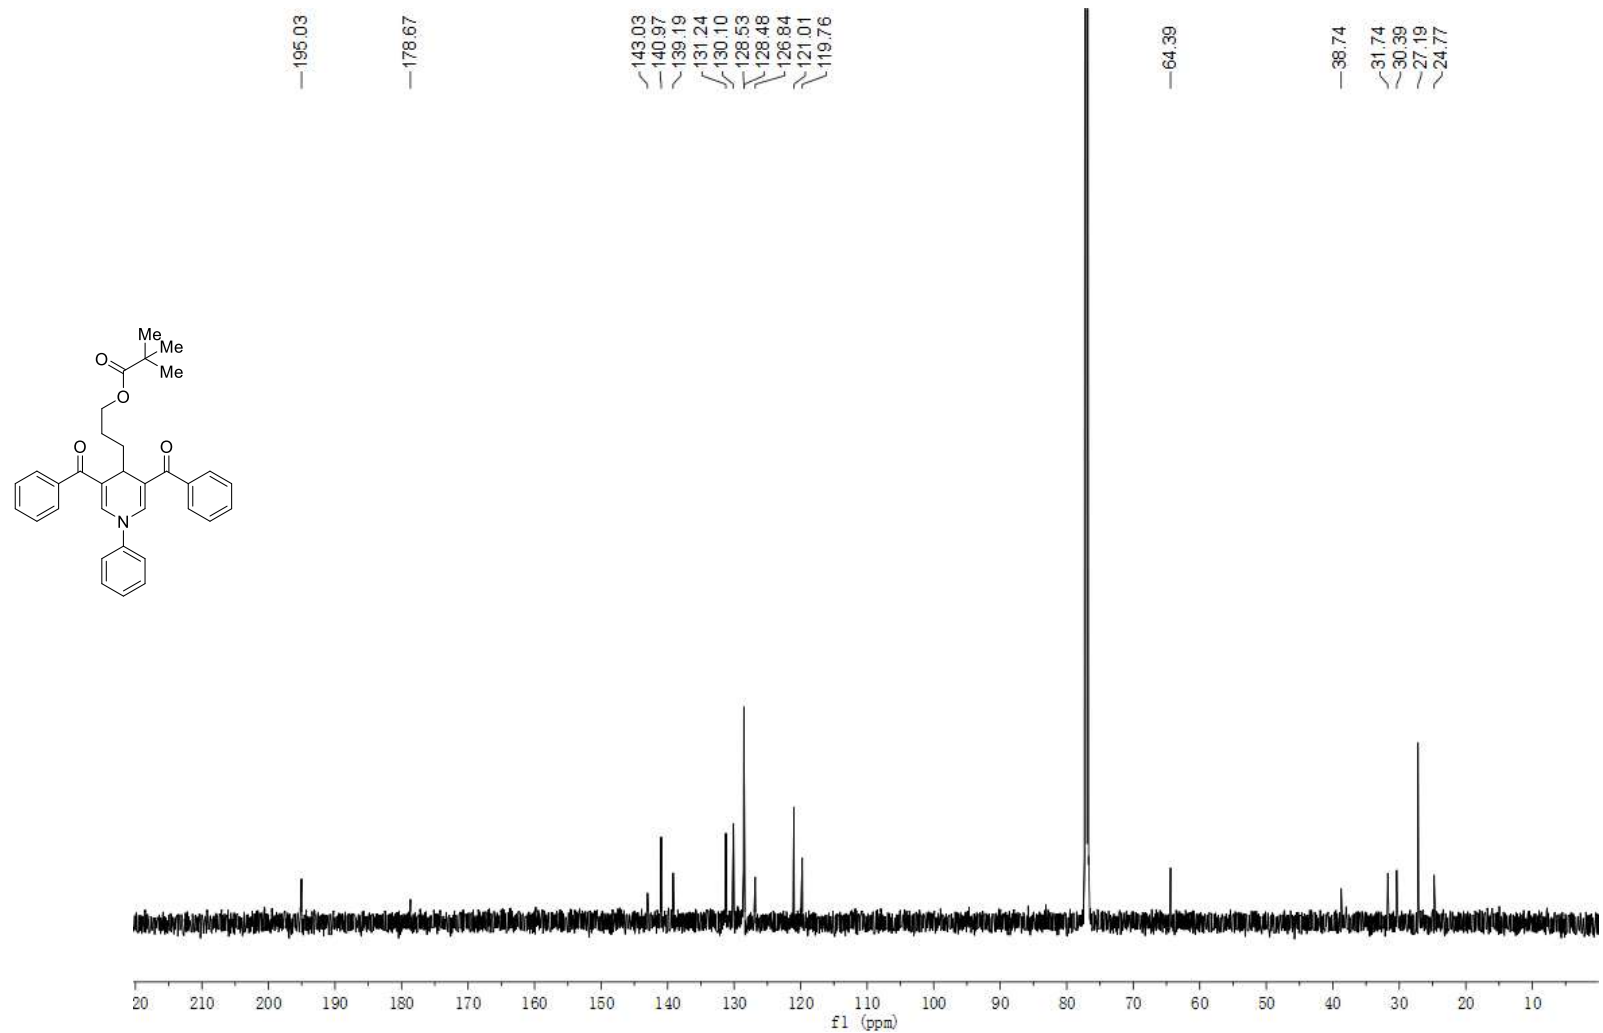

**Figure S52.** <sup>13</sup>C NMR (150 MHz, CDCl<sub>3</sub>) spectra of compound **4z**

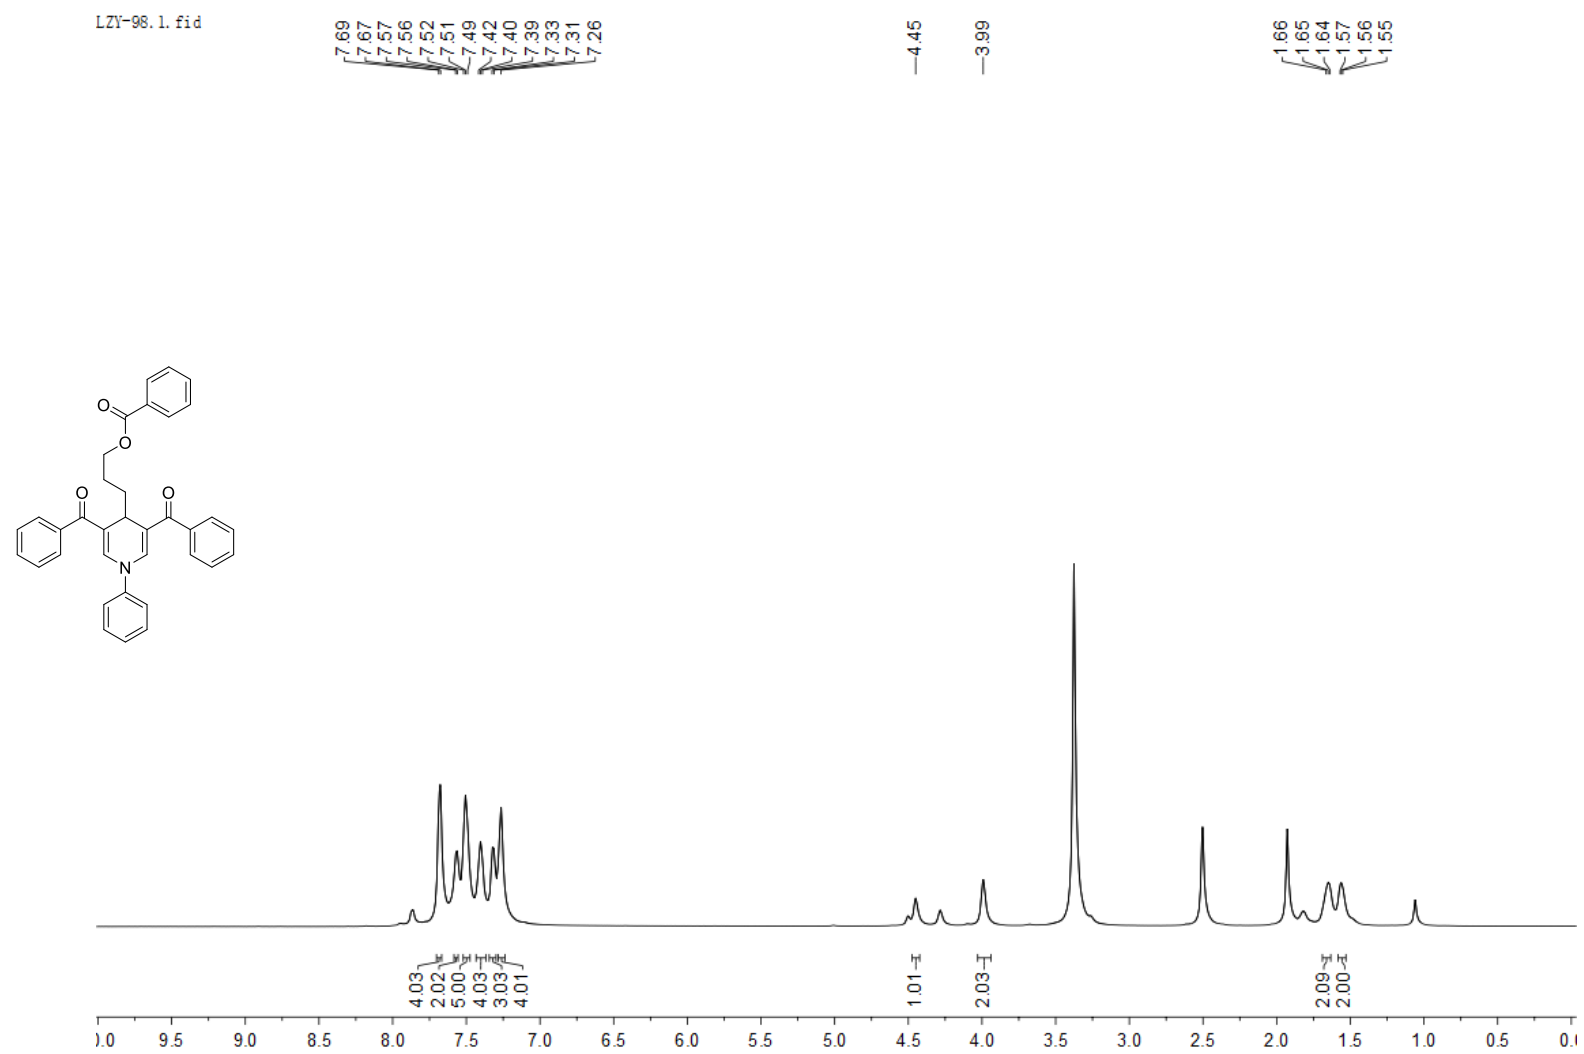

**Figure S53.**  $^1\text{H}$  NMR (600 MHz,  $\text{DMSO-}d_6$ ) spectra of compound **4a'**

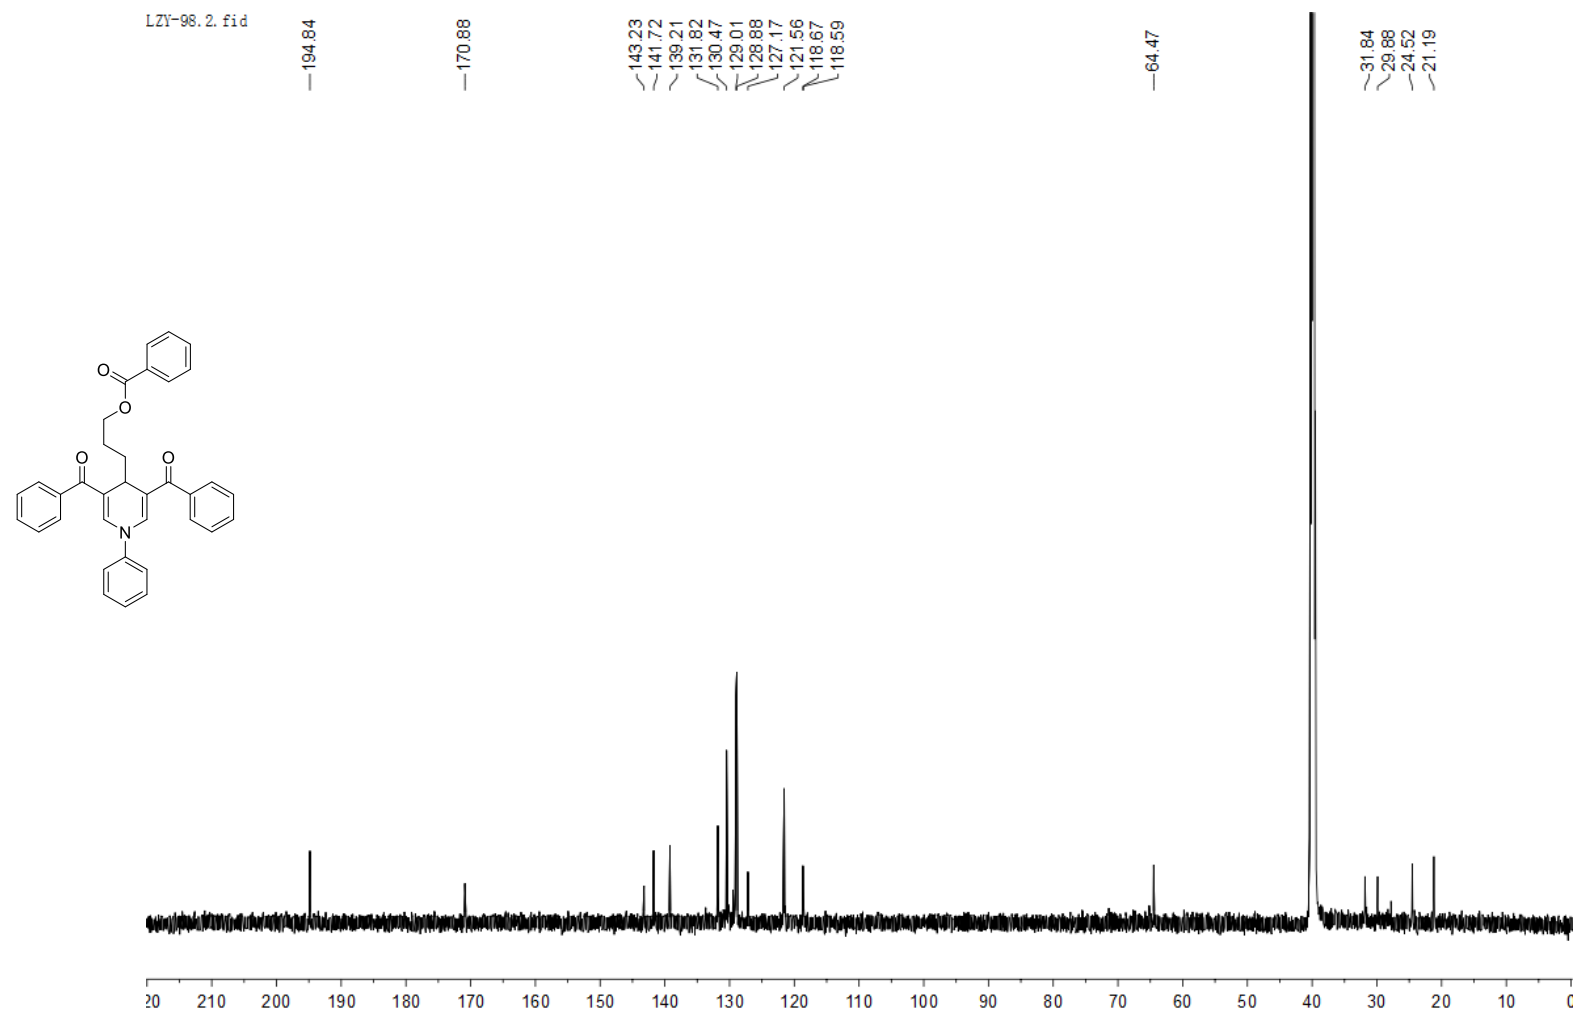

Figure S54.  $^{13}\text{C}$  NMR (150 MHz,  $\text{DMSO-}d_6$ ) spectra of compound **4a'**

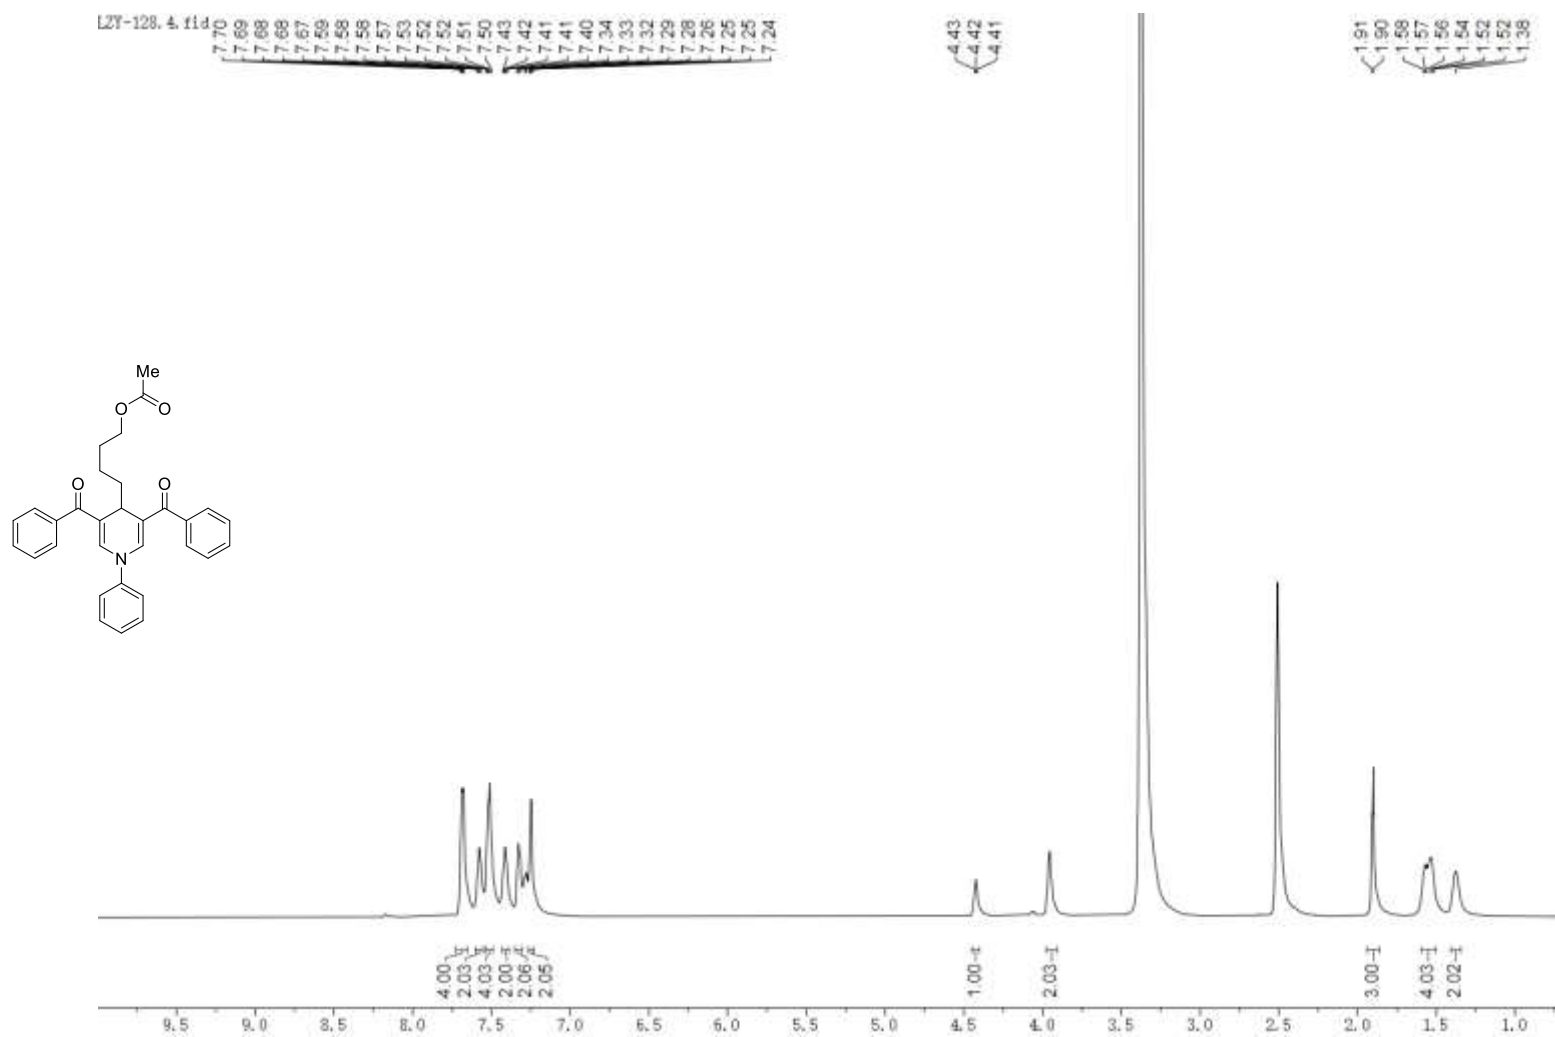

**Figure S55.** <sup>1</sup>H NMR (600 MHz, DMSO-*d*<sub>6</sub>) spectra of compound **4b'**

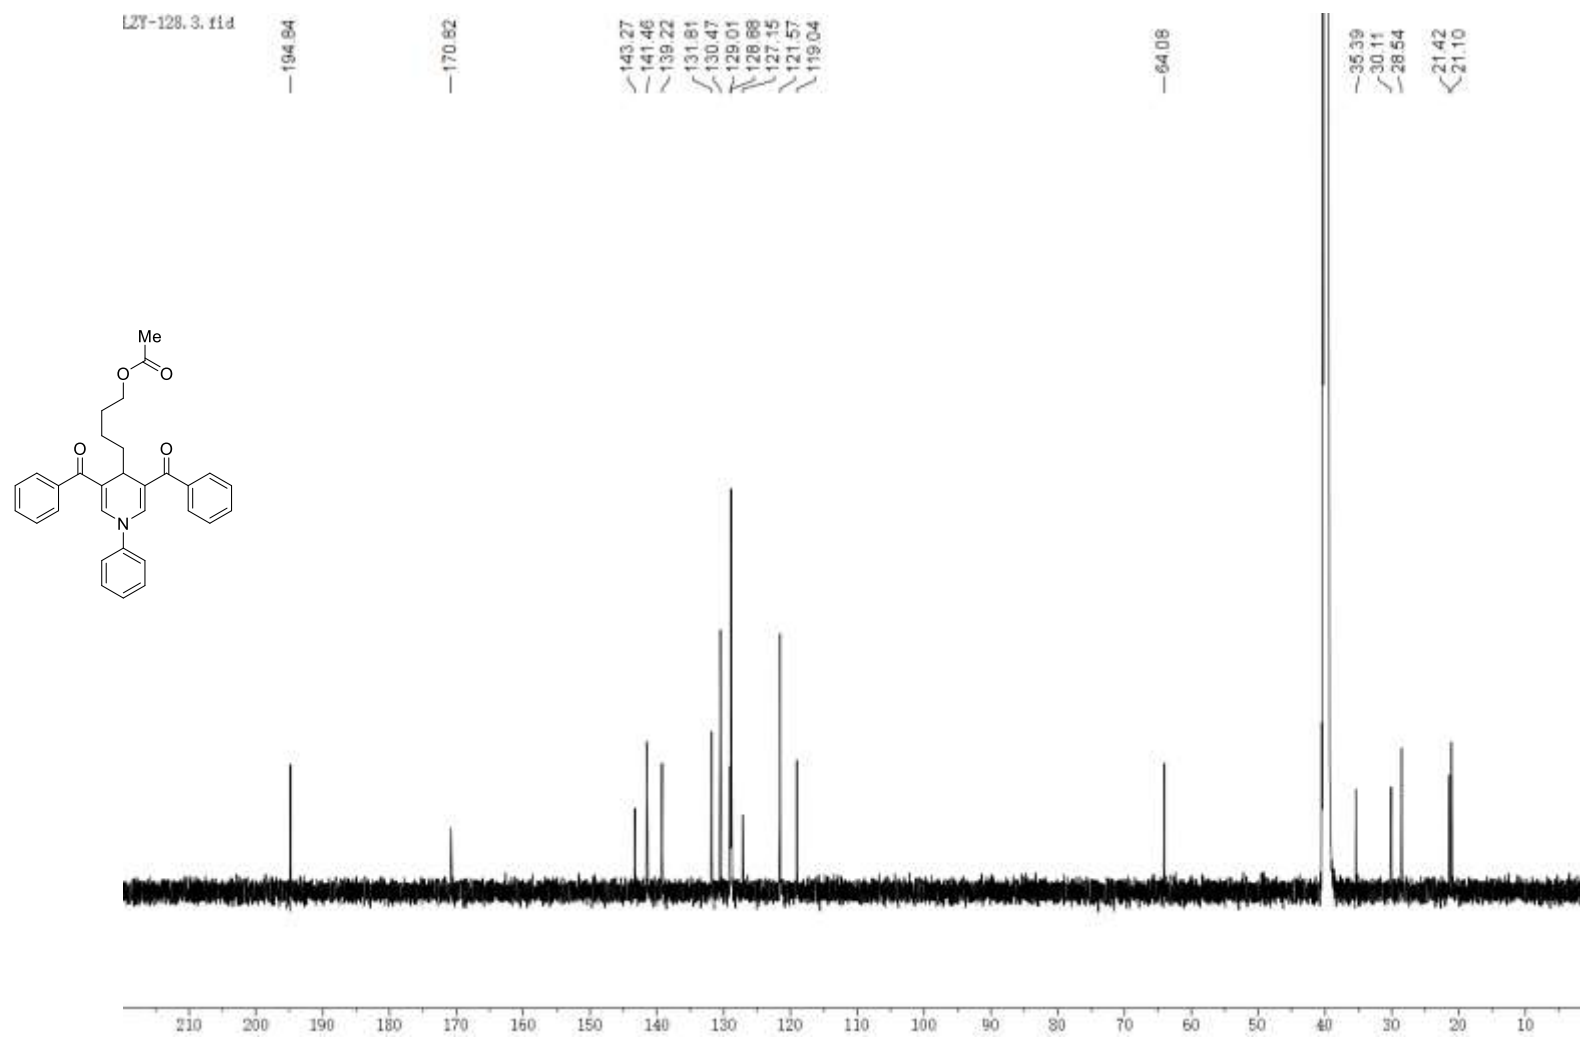

Figure S56.  $^{13}\text{C}$  NMR (150 MHz,  $\text{DMSO-}d_6$ ) spectra of compound **4b'**



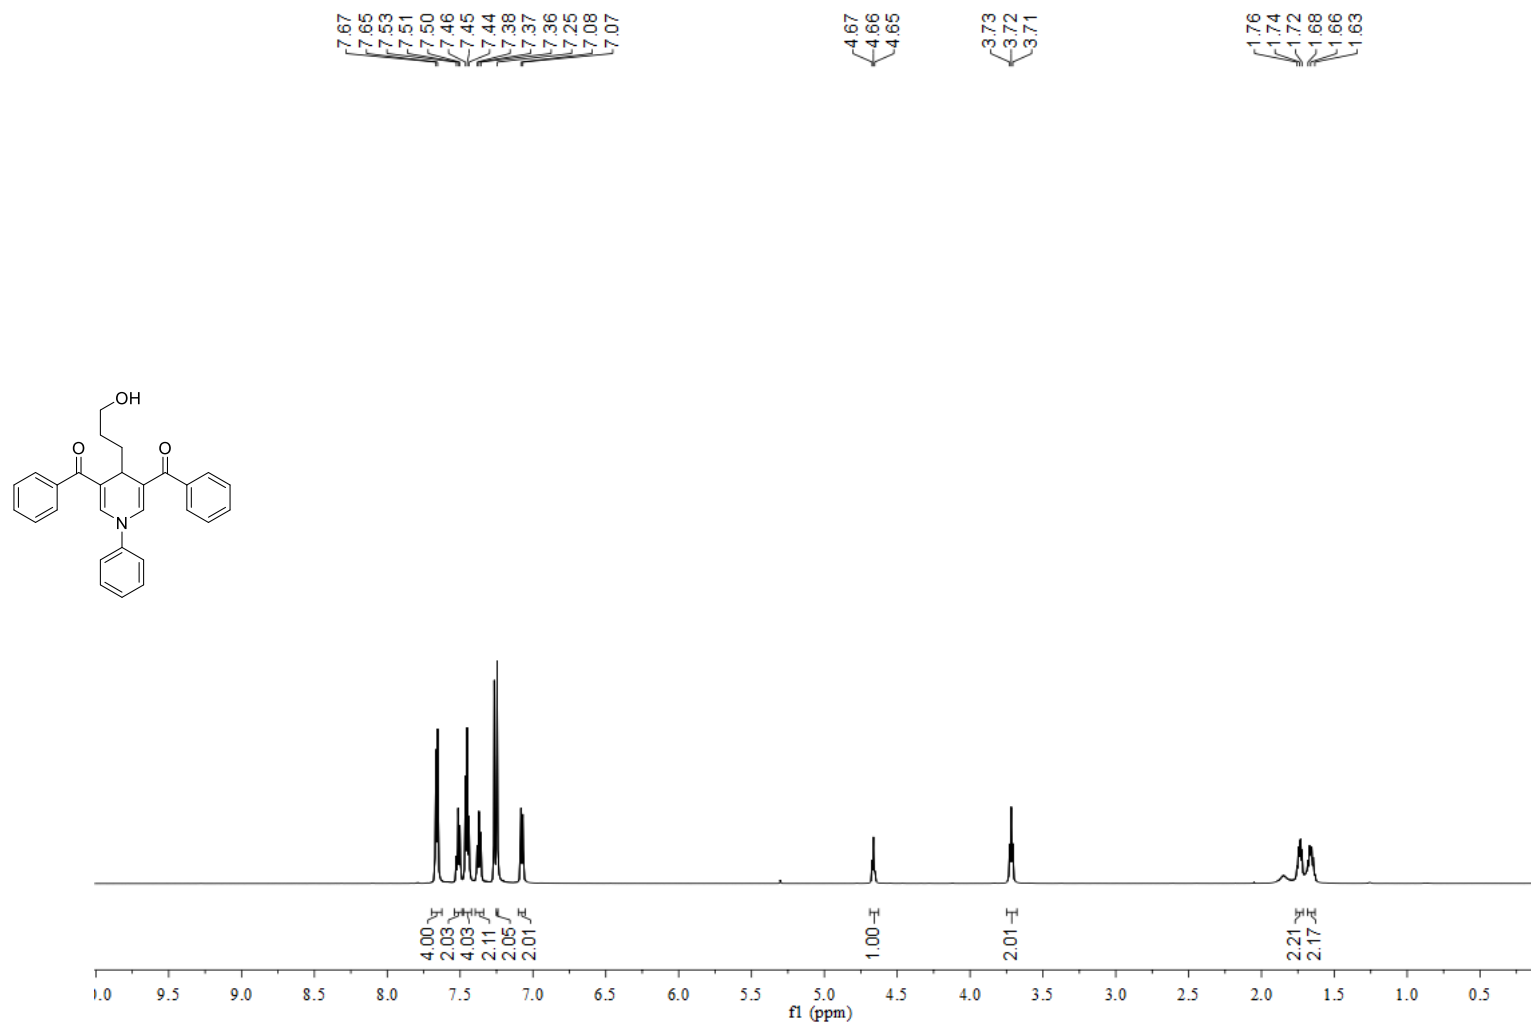

**Figure S57.** <sup>1</sup>H NMR (600 MHz, CDCl<sub>3</sub>) spectra of compound **5**

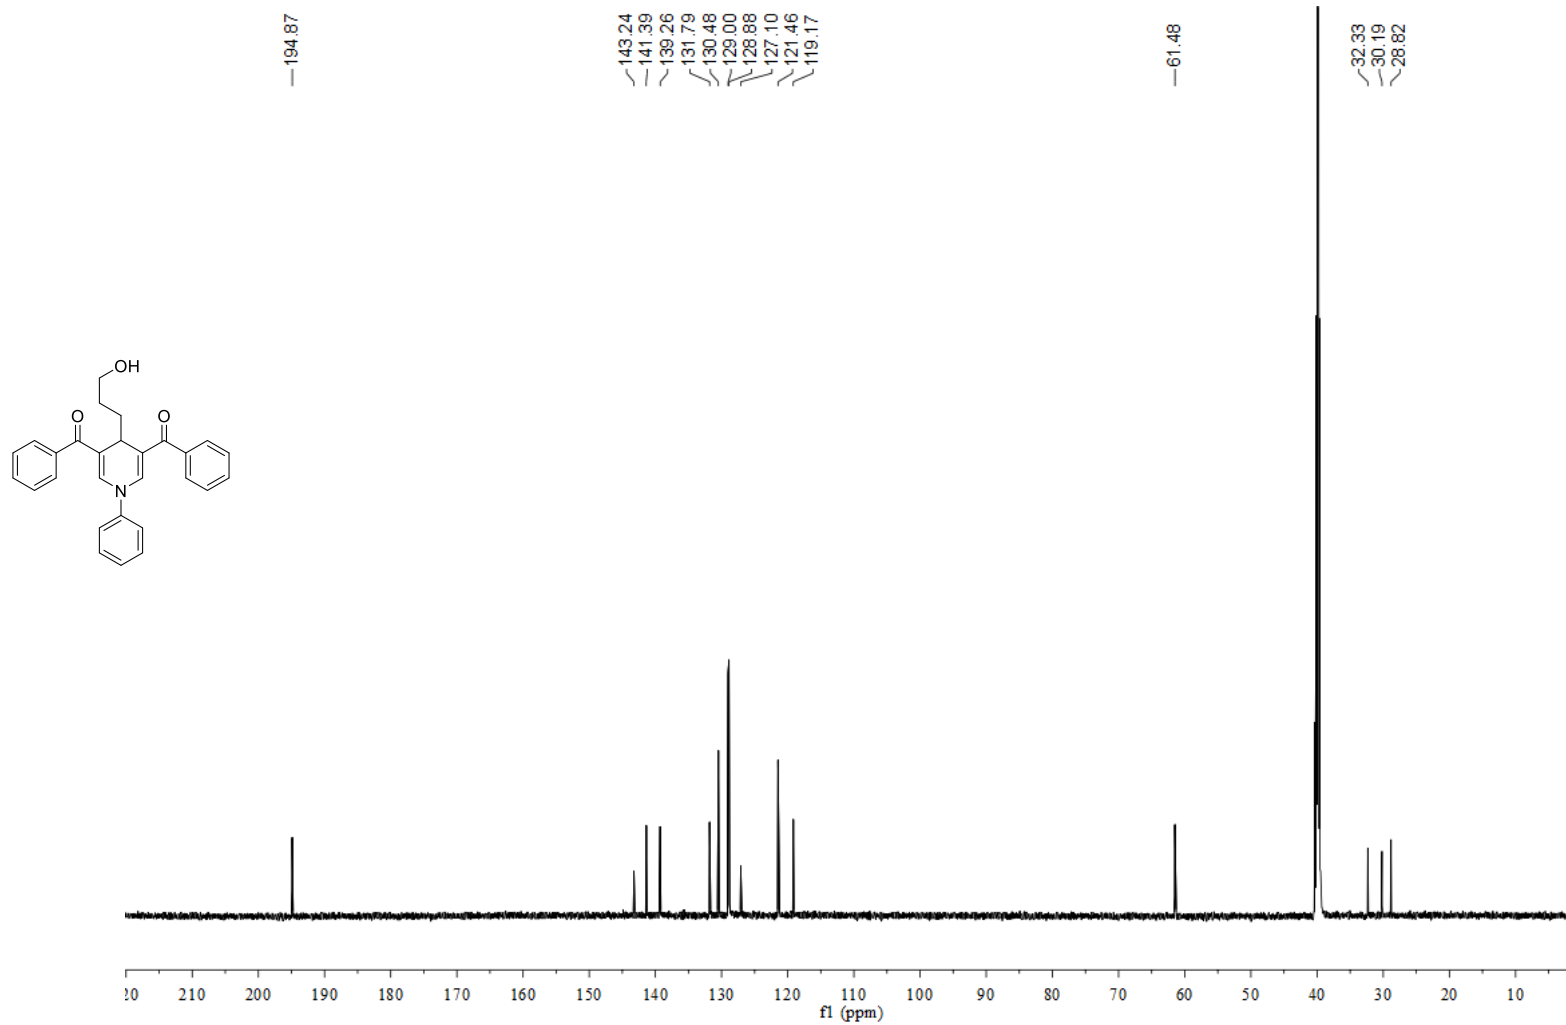

Figure S58. <sup>13</sup>C NMR (150 MHz, DMSO-*d*<sub>6</sub>) spectra of compound 5

## 5. References and notes.

1. (a) Y. Liu, R. Zhou, J.-P. Wan. *Synth. Commun.* **2013**, *43*, 2475; (b) Z.-Z. Zhou, F.-S. Liu, D.-S. Shen, C. Tan, L.-Y. Luo. *Inorg. Chem. Commun.* **2011**, *14*, 659; (c) N. A. Larina, V. Lokshin, J. Berthet, S. Delbaere, G. Vermeersch, V. Khodorkovsky, *Tetrahedron* **2010**, *66*, 8291; (d) P. Zhou, B. Hu, K. Rao, L. Li, J. Yang, C. Gao, F. Wang, F. Yu. *Synlett*, **2018**, *29*, 519.
